# Supplementary material
Source: publisher figshare collection journal article supplement (https://gsapubs.figshare.com/ndownloader/files/34070621)
Supplement: Supplementary file 1 [file 34070621]

## Sheet: Zircon RMs 20um spots
Table S6. U-Th-Pb Isotope Data for Zircon Reference Materials (20 mm spots)																													Sylvester, Souders, Liu Geology G49684
Mineral Isotope Laser Laboratory (MILL), Texas Tech University, 20 µm spots, 2.5 J/cm2, 30 sec total ablation, 8Hz, 240 shots												U-Pb Data for Wetherill plot3					U-Pb Data for Tera-Wasserburg plot3				Th-Pb Data3		Dates (Ma)5								206/238-207/235	206/238-207/206
Count	Grain-Analysis No.	Source file	Date	Duration (s)	Points	U ppm1	Th ppm1	Th/U1	204Pb cps	206Pb cps	206Pb/204Pb	207Pb/235U	2sprop4	206Pb/238U	2sprop4	Error Correlation Rho	238U/206Pb	2sint4	207Pb/206Pb	2sprop4	208Pb/232Th	2sprop4	207Pb/235U	2sprop4	206Pb/238U	2sprop4	207Pb/206Pb	2sprop4	208Pb/232Th	2sprop4	% Conc7	% Conc8
	Plešovice zircon (206Pb/238U= 337.16 ± 0.11 (2s) Ma; Sláma et al., 2008 recalculated by Horstwood et al., 2016)
1	PL-1	8462c_TRA_Data	04/11/2018 (1)	16.352	78	437	47.7	0.109153	13	319700	24592.3	0.3964	0.0097	0.05398	0.0015	0.36876	18.5254	0.16	0.05344	0.00069	0.01703	0.00057	339	7	338.9	9.2	346	15	341.2	11	99.9705	97.948
2	PL-2	8463c_TRA_Data	04/11/2018 (1)	28.142	138	628	59.2	0.0942675	84	370000	4404.76	0.3963	0.0094	0.05387	0.0015	0.29986	18.5632	0.13	0.05322	0.00062	0.01747	0.00043	338.9	6.8	338.2	9	338	14	350	8.5	99.7934	100.059
3	PL-3	8463c_TRA_Data	04/11/2018 (1)	19.386	98	706	74.3	0.105241	6	338700	56450	0.3961	0.0096	0.05407	0.0015	0.42852	18.4945	0.15	0.05336	0.00066	0.01724	0.00055	338.7	7	339.5	9.1	343	17	345.4	11	100.236	98.9796
4	PL-1	8464c_TRA_Data	04/11/2018 (1)	28.133	140	654	61.3	0.0937309	57	375000	6578.95	0.3977	0.0081	0.05338	0.0006	0.4278	18.7336	0.13	0.05359	0.00061	0.01716	0.00046	339.8	5.9	335.2	3.7	352.7	13	343.9	9.1	98.6463	95.0383
5	PL-2	8465c_TRA_Data	04/11/2018 (1)	28.138	142	653	59.4	0.0909648	32	366000	11437.5	0.3953	0.0081	0.05351	0.0006	0.36314	18.6881	0.13	0.05303	0.00062	0.01723	0.0005	338.1	5.9	336	3.7	328	14	345.3	9.9	99.3789	102.439
6	PL-3	8465c_TRA_Data	04/11/2018 (1)	8.0401	40	845	70.9	0.0839053	40	427000	10675	0.3989	0.0095	0.05412	0.00087	0.40115	18.4775	0.24	0.05355	0.00092	0.01828	0.00076	340.8	6.9	339.8	5.3	353	23	366	15	99.7066	96.2606
7	PL-1	8467c_TRA_Data	04/11/2018 (1)	17.784	89	243	22.53	0.092716	90	380000	4222.22	0.4032	0.0095	0.05668	0.0012	0.27789	17.6429	0.16	0.05272	0.0006	0.01671	0.00041	343.8	6.9	355.4	7.6	309	15	335	8.2	103.374	115.016
8	PL-2	8467c_TRA_Data	04/11/2018 (1)	15.189	77	765	70	0.0915033	103	386000	3747.57	0.3998	0.0095	0.05326	0.0012	0.54753	18.7758	0.18	0.05367	0.00053	0.01765	0.00051	341.4	6.9	334.5	7.1	356	13	354	10	97.9789	93.9607
9	PL-3	8468c_TRA_Data	04/11/2018 (1)	11.328	58	543.1	76.3	0.14049	6	399800	66633.3	0.3982	0.0094	0.05422	0.0012	0.32044	18.4434	0.15	0.05237	0.00059	0.01613	0.00046	340.3	6.8	340.4	7.1	301	13	323.3	9.2	100.029	113.09
10	PL-1	8469c_TRA_Data	04/11/2018 (1)	19.064	96	738	70.2	0.095122	39	419000	10743.6	0.4028	0.014	0.0545	0.0015	0.39534	18.3486	0.15	0.05367	0.00074	0.01774	0.0006	343.6	10	342.1	9	356	18	355.4	12	99.5634	96.0955
11	PL-2	8469c_TRA_Data	04/11/2018 (1)	16.352	83	567	60.5	0.106702	61	344300	5644.26	0.3979	0.014	0.05382	0.0015	0.59706	18.5804	0.15	0.05315	0.00073	0.01724	0.00064	340	10	337.9	8.9	335	19	345.5	13	99.3824	100.866
12	PL-1	8472c_TRA_Data	04/11/2018 (1)	21.115	107	758	72.8	0.0960422	69	426000	6173.91	0.3951	0.0052	0.0536	0.0012	0.23149	18.6567	0.19	0.05369	0.00086	0.01755	0.00067	338	3.7	336.5	7.4	358	20	351.5	13	99.5562	93.9944
13	PL-2	8473c_TRA_Data	04/11/2018 (1)	20.331	103	764	75.02	0.0981937	37	424400	11470.3	0.397	0.0053	0.05387	0.0012	0.34209	18.5632	0.17	0.0531	0.00082	0.01747	0.00067	339.4	3.8	338.2	7.3	332	21	350	13	99.6464	101.867
14	PL-3	8473c_TRA_Data	04/11/2018 (1)	28.109	141	718	73.3	0.102089	18	406400	22577.8	0.3897	0.0047	0.05386	0.0011	0.14252	18.5666	0.13	0.05302	0.00078	0.01729	0.00063	334.1	3.4	338.2	7	328	21	346.5	13	101.227	103.11
15	PL-1	8474c_TRA_Data	04/11/2018 (1)	10.478	53	824	76.7	0.0930825	32	463000	14468.8	0.3925	0.0068	0.05337	0.001	0.54266	18.7371	0.27	0.05396	0.0008	0.01753	0.00079	336.1	5	335.2	6.4	370	19	351	16	99.7322	90.5946
16	PL-2	8475c_TRA_Data	04/11/2018 (1)	13.379	68	941	88.8	0.0943677	49	531000	10836.7	0.394	0.0059	0.05417	0.001	0.56038	18.4604	0.28	0.05324	0.0007	0.01696	0.00073	337.1	4.3	340	6.3	333	17	339.9	15	100.86	102.102
17	PL-3	8475c_TRA_Data	04/11/2018 (1)	7.259	37	1091	98.4	0.0901925	140	601000	4292.86	0.3847	0.008	0.05335	0.001	0.44771	18.7441	0.28	0.05298	0.00098	0.01754	0.00083	330.3	5.8	335	6.3	328	17	351	17	101.423	102.134
18	PL-1	8477c_TRA_Data	04/11/2018 (1)	28.126	142	834	83.9	0.1006	28	459000	16392.9	0.3918	0.0031	0.05383	0.00051	0.32779	18.577	0.13	0.05266	0.00047	0.0171	0.00063	335.6	2.3	338	3.1	313	10	342.6	13	100.715	107.987
19	PL-2	8478c_TRA_Data	04/11/2018 (1)	28.122	142	881	89.4	0.101476	55	465000	8454.55	0.3975	0.003	0.05438	0.00052	0.33979	18.3891	0.12	0.0531	0.00042	0.01706	0.00062	339.8	2.2	341.4	3.2	333.2	9.6	341.8	12	100.471	102.461
20	PL-3	8478c_TRA_Data	04/11/2018 (1)	28.116	142	891	90.7	0.101796	120	467000	3891.67	0.3939	0.0033	0.05375	0.00053	0.42164	18.6046	0.13	0.05316	0.00043	0.0171	0.00064	337.1	2.4	337.5	3.2	337	10	342.7	13	100.119	100.148
21	PL-1	8479c_TRA_Data	04/11/2018 (1)	12.114	62	1125	97.2	0.0864	79	562000	7113.92	0.3856	0.0074	0.05287	0.00089	0.27868	18.9143	0.25	0.05284	0.0013	0.0186	0.00079	331.1	5.5	332.1	5.5	319	32	372	16	100.302	104.107
22	PL-2	8479c_TRA_Data	04/11/2018 (1)	21.026	106	1023	90.3	0.0882698	117	498000	4256.41	0.3863	0.0061	0.05195	0.00068	0.34619	19.2493	0.16	0.05342	0.0011	0.01747	0.0005	331.6	4.5	326.5	4.1	349	27	350	9.9	98.462	93.553
23	PL-3	8480c_TRA_Data	04/11/2018 (1)	16.68	83	1361	164	0.1205	67	656000	9791.04	0.3856	0.0064	0.05291	0.00069	0.45892	18.9	0.16	0.05332	0.0011	0.01761	0.00051	331.1	4.7	332.3	4.2	345	29	352.9	10	100.362	96.3188
24	PL-1	8481c_TRA_Data	04/11/2018 (1)	7.9715	41	1091	112	0.102658	30	588000	19600	0.4151	0.01	0.0555	0.0012	0.61561	18.018	0.33	0.05303	0.0012	0.01631	0.0012	352.4	7.2	348.1	7.6	334	24	327	24	98.7798	104.222
25	PL-2	8482c_TRA_Data	04/11/2018 (1)	4.4873	23	1035	104.9	0.101353	140	578000	4128.57	0.3999	0.0095	0.0551	0.0014	0.3266	18.1488	0.41	0.0526	0.0015	0.01588	0.0013	341.5	6.9	345.9	8.8	306	46	318	26	101.288	113.039
26	PL-3	8482c_TRA_Data	04/11/2018 (1)	4.247	21	1142	110.9	0.0971103	130	620000	4769.23	0.399	0.012	0.0566	0.0016	0.51449	17.6678	0.41	0.0526	0.0015	0.01551	0.0012	340.7	8.7	355	9.6	306	38	311	23	104.197	116.013
27	PL-1	8483c_TRA_Data	04/11/2018 (1)	3.4152	17	1234	114.9	0.0931118	120	643000	5358.33	0.3939	0.01	0.0545	0.0015	0.66853	18.3486	0.45	0.0523	0.0011	0.01521	0.001	337.1	7.5	342.3	9.1	300	19	305	20	101.543	114.1
28	PL-2	8484c_TRA_Data	04/11/2018 (1)	21.063	106	971	88.6	0.0912461	81	495000	6111.11	0.3912	0.011	0.0534	0.0014	0.93158	18.7266	0.44	0.05299	0.00065	0.01691	0.00069	334.7	7.9	335.4	8.4	328	15	338.9	14	100.209	102.256
29	PL-3	8484c_TRA_Data	04/11/2018 (1)	24.756	125	843	79.5	0.094306	40	433000	10825	0.3807	0.0082	0.05196	0.001	0.88122	19.2456	0.31	0.05324	0.00062	0.01672	0.00063	327.2	6	326.5	6.3	337	16	335.1	13	99.7861	96.8843
30	PL-1	8485c_TRA_Data	04/11/2018 (1)	28.119	141	861	84.1	0.0976771	19	450000	23684.2	0.3936	0.013	0.05396	0.002	0.38287	18.5323	0.13	0.05298	0.00067	0.01696	0.00057	336.9	9.2	338.8	12	327	17	339.9	11	100.564	103.609
31	PL-2	8485c_TRA_Data	04/11/2018 (1)	18.534	93	720	74	0.102778	9	390000	43333.3	0.3966	0.013	0.05451	0.0021	0.3794	18.3453	0.17	0.05283	0.00073	0.01736	0.00069	339.1	9.3	342.2	13	320	20	347.9	14	100.914	106.938
32	PL-1	8582c_TRA_Data	16/11/2018 (6)	25.24	127	670	62.9	0.0938806	64	535000	8359.38	0.4065	0.015	0.05372	0.00078	0.23958	18.615	0.12	0.05385	0.001	0.01706	0.00033	346.3	11	337.3	4.7	367	25	341.8	6.5	97.4011	91.9074
33	PL-2	8583c_TRA_Data	16/11/2018 (6)	16.825	85	556	58.3	0.104856	32	468000	14625	0.3973	0.015	0.05372	0.00078	0.2718	18.615	0.13	0.05378	0.001	0.01699	0.00036	339.6	11	337.3	4.8	363	24	340.4	7.2	99.3227	92.9201
34	PL-3	8583c_TRA_Data	16/11/2018 (6)	12.792	63	796	69.7	0.0875628	25	604000	24160	0.3967	0.015	0.05355	0.00089	0.32811	18.6741	0.19	0.05334	0.0011	0.01746	0.00049	339.2	11	336.2	5.4	341	24	349.8	9.8	99.1156	98.5924
35	PL-1	8584c_TRA_Data	16/11/2018 (6)	28.179	141	674	61.3	0.0909496	64	535000	8359.38	0.3947	0.022	0.05376	0.0006	0.39278	18.6012	0.11	0.05333	0.0057	0.0174	0.0031	337.7	34	337.6	3.7	341.7	14	348.6	16	99.9704	98.8001
36	PL-2	8585c_TRA_Data	16/11/2018 (6)	19.254	97	727	67.4	0.0927098	34	571000	16794.1	0.3926	0.022	0.05384	0.00063	0.26906	18.5736	0.12	0.05274	0.0057	0.01709	0.0031	336.2	34	338	3.9	317	13	342.5	16	100.535	106.625
37	PL-3	8585c_TRA_Data	16/11/2018 (6)	19.189	97	726	66.9	0.0921488	61	574000	9409.84	0.3866	0.022	0.05392	0.00067	0.30454	18.546	0.15	0.0519	0.0056	0.01667	0.003	331.8	33	338.5	4.1	281	14	334.1	16	102.019	120.463
38	PL-1	8537c_TRA_Data	13/11/2018 (3)	21.19	107	645	66	0.102326	26	461000	17730.8	0.3923	0.0033	0.05387	0.00031	0.19256	18.5632	0.11	0.05298	0.00055	0.01673	0.00034	335.9	2.4	338.2	1.9	325	14	335.3	6.8	100.685	104.062
39	PL-2	8537c_TRA_Data	13/11/2018 (3)	25.062	127	763	70.7	0.0926606	6	525000	87500	0.3954	0.0028	0.05358	0.00039	0.13191	18.6637	0.13	0.0532	0.00057	0.01698	0.00031	338.2	2.1	336.4	2.4	337	14	340.3	6.1	99.4678	99.822
40	PL-3	8538c_TRA_Data	13/11/2018 (3)	17.545	89	596	62.6	0.105034	33	440000	13333.3	0.3915	0.0035	0.05395	0.0004	0.29254	18.5357	0.14	0.05329	0.00058	0.01646	0.00037	335.4	2.6	338.7	2.5	339	15	329.9	7.3	100.984	99.9115
41	PL-1	8540c_TRA_Data	13/11/2018 (3)	28.12	142	685	64.6	0.0943066	44	494000	11227.3	0.3943	0.0028	0.0536	0.0012	0.26089	18.6567	0.12	0.05352	0.00069	0.01706	0.00037	337.4	2	336.6	7.5	350.7	14	341.9	7.4	99.7629	95.9795
42	PL-2	8541c_TRA_Data	13/11/2018 (3)	28.112	141	705	65.5	0.0929078	54	493000	9129.63	0.3939	0.0027	0.05374	0.0012	0.31578	18.6081	0.12	0.0532	0.00066	0.01613	0.00035	337.4	2	337.4	7.5	339	18	323.5	7	100	99.528
43	PL-3	8542c_TRA_Data	13/11/2018 (3)	28.121	142	712	67.9	0.0953652	22	490000	22272.7	0.3962	0.0029	0.05387	0.0012	0.41406	18.5632	0.12	0.05327	0.00066	0.01745	0.00039	338.8	2.1	338.2	7.5	340.6	15	349.7	7.7	99.8229	99.2954
44	PL-1	8543c_TRA_Data	13/11/2018 (3)	28.106	142	687	63.2	0.0919942	34	464000	13647.1	0.392	0.0075	0.05356	0.00093	0.40914	18.6706	0.11	0.05334	0.00039	0.01694	0.00058	335.8	5.4	336.3	5.7	341.8	9	339.6	12	100.149	98.3909
45	PL-2	8544c_TRA_Data	13/11/2018 (3)	26.478	133	664	64.2	0.0966867	41	457000	11146.3	0.4019	0.0077	0.05414	0.00094	0.33782	18.4706	0.1	0.05396	0.00043	0.01722	0.00059	342.9	5.6	339.9	5.7	369.7	9.2	345.1	12	99.1251	91.9394
46	PL-3	8544c_TRA_Data	13/11/2018 (3)	14.973	75	742	67.7	0.0912399	51	490000	9607.84	0.3978	0.0083	0.05355	0.00099	0.15503	18.6741	0.16	0.05397	0.00069	0.01697	0.00064	340	6	336.3	6.1	374	13	340.1	13	98.9118	89.9198
47	PL-1	8545c_TRA_Data	13/11/2018 (3)	21.5	108	727	65.5	0.0900963	28	476000	17000	0.3953	0.0098	0.05353	0.00092	0.16745	18.6811	0.14	0.05347	0.00065	0.01727	0.00063	338.2	7.1	336.1	5.6	350	16	346.1	13	99.3791	96.0286
48	PL-2	8545c_TRA_Data	13/11/2018 (3)	23.008	115	629	63.1	0.100318	3	427000	142333	0.3963	0.0097	0.05384	0.00091	0.4184	18.5736	0.12	0.05329	0.00054	0.01637	0.00058	338.9	7	338.1	5.5	340.3	12	328.3	12	99.7639	99.3535
49	PL-3	8545c_TRA_Data	13/11/2018 (3)	21.088	106	705	67.8	0.0961702	74	458000	6189.19	0.3955	0.0097	0.05338	0.00092	0.36794	18.7336	0.14	0.05352	0.0006	0.01646	0.0006	338.3	7	335.2	5.6	351	14	329.9	12	99.0837	95.4986
50	PL-1	8547c_TRA_Data	13/11/2018 (3)	28.91	146	661	62.2	0.0940998	33	409000	12393.9	0.3938	0.0084	0.05347	0.0008	0.2899	18.7021	0.12	0.05338	0.00045	0.01687	0.00032	337.1	6.1	335.8	4.9	344	11	338.1	6.3	99.6144	97.6163
51	PL-2	8547c_TRA_Data	13/11/2018 (3)	28.107	141	677	64.2	0.0948301	30	411000	13700	0.3944	0.0083	0.05373	0.00079	0.35641	18.6116	0.11	0.05327	0.00036	0.01706	0.00031	337.5	6.1	337.3	4.8	334.8	9.2	341.8	6.2	99.9407	100.747
52	PL-3	8548c_TRA_Data	13/11/2018 (3)	28.111	142	669	64.5	0.0964126	10	405000	40500	0.3962	0.0083	0.05358	0.00079	0.41083	18.6637	0.11	0.05337	0.00039	0.01654	0.00032	338.8	6.1	336.5	4.8	344.1	8.8	331.5	6.3	99.3211	97.7913
53	PL-1	8549c_TRA_Data	13/11/2018 (3)	24.461	124	648	62.3	0.096142	32	391000	12218.8	0.3935	0.013	0.05321	0.0013	0.32676	18.7935	0.12	0.05362	0.00083	0.01757	0.00043	336.8	9.2	334.2	7.7	355	19	352	8.6	99.228	94.1408
54	PL-2	8550c_TRA_Data	13/11/2018 (3)	22.476	113	584	56.7	0.097089	24	369000	15375	0.3901	0.012	0.05383	0.0013	0.31718	18.577	0.14	0.05303	0.00083	0.01681	0.00045	334.4	9.1	338	7.9	329	19	336.9	9	101.077	102.736
55	PL-3	8550c_TRA_Data	13/11/2018 (3)	25.758	130	665	63	0.0947368	12	387000	32250	0.394	0.013	0.05329	0.0013	0.43174	18.7653	0.12	0.05337	0.0008	0.01717	0.00042	337.2	9.2	334.7	7.7	342.3	17	344.1	8.3	99.2586	97.7797
56	PL-1	8551c_TRA_Data	13/11/2018 (3)	24.383	123	607	56.6	0.0932455	32	368000	11500	0.3953	0.022	0.05382	0.0017	0.24008	18.5804	0.13	0.05293	0.011	0.01697	0.0071	338.2	6.9	337.9	6	328	16	340.2	14	99.9113	103.018
57	PL-2	8552c_TRA_Data	13/11/2018 (3)	21.675	109	575	57.1	0.0993043	21	350600	16695.2	0.3958	0.022	0.05378	0.0017	0.41229	18.5943	0.13	0.05295	0.011	0.01674	0.007	338.6	6.9	337.7	7	325	15	335.5	14	99.7342	103.908
58	PL-3	8552c_TRA_Data	13/11/2018 (3)	10.577	53	827	71.3	0.0862152	27	443000	16407.4	0.3868	0.022	0.05318	0.0018	0.35889	18.8041	0.28	0.0535	0.011	0.01694	0.0071	331.9	6.9	334	7	348	14	339	14	100.633	95.977
59	PL-1	8553c_TRA_Data	13/11/2018 (3)	20.924	106	721	67.3	0.0933426	33	407000	12333.3	0.3945	0.0082	0.05426	0.00075	0.35112	18.4298	0.16	0.05288	0.0013	0.01705	0.004	337.6	6	340.6	4.6	326	35	341.6	10	100.889	104.479
60	PL-2	8554c_TRA_Data	13/11/2018 (3)	9.8869	50	816	71.2	0.0872549	24	443000	18458.3	0.4001	0.0089	0.05435	0.00081	0.47858	18.3993	0.2	0.05318	0.0014	0.01655	0.0039	341.6	6.5	341.2	5	335	42	332	11	99.8829	101.851
61	PL-3	8554c_TRA_Data	13/11/2018 (3)	28.124	142	658	63.8	0.0969605	20	375000	18750	0.3945	0.0079	0.05386	0.00066	0.24345	18.5666	0.1	0.05304	0.0013	0.0167	0.004	337.6	5.8	338.2	4.1	330	31	334.8	11	100.178	102.485
62	PL-1	8555c_TRA_Data	13/11/2018 (3)	15.115	77	743	68.7	0.092463	3	413000	137667	0.4022	0.017	0.0511	0.0018	0.26944	19.5695	0.15	0.05352	0.00079	0.01718	0.00046	343.2	6	321.3	5	351	18	344.2	9.2	93.6189	91.5385
63	PL-2	8556c_TRA_Data	13/11/2018 (3)	16.047	81	568	60.4	0.106338	8	341500	42687.5	0.396	0.016	0.054	0.0019	0.11109	18.5185	0.14	0.05342	0.00082	0.01638	0.00048	338.7	6	339	6	345	18	328.4	9.6	100.089	98.2609
64	PL-3	8556c_TRA_Data	13/11/2018 (3)	10.424	52	490	55	0.112245	51	302800	5937.25	0.3889	0.016	0.0565	0.002	0.39815	17.6991	0.17	0.0536	0.00082	0.01584	0.00057	333.5	6	354.3	6	356	20	318	11	106.237	99.5225
65	PL-1	8557c_TRA_Data	13/11/2018 (3)	28.124	142	701	73.1	0.10428	41	393000	9585.37	0.3973	0.01	0.05402	0.0012	0.36826	18.5117	0.13	0.05338	0.00077	0.01718	0.0004	339.6	7.3	339.1	7.5	343	18	344.2	7.9	99.8528	98.863
66	PL-2	8558c_TRA_Data	13/11/2018 (3)	25.376	128	683	67.6	0.0989751	6	379000	63166.7	0.3899	0.0098	0.0532	0.0012	0.36566	18.797	0.13	0.05307	0.00075	0.0171	0.00039	334.2	7.2	334.1	7.4	330	18	342.8	7.7	99.9701	101.242
67	PL-3	8558c_TRA_Data	13/11/2018 (3)	17.196	86	808	71.4	0.0883663	30	428000	14266.7	0.3939	0.01	0.05377	0.0013	0.4033	18.5977	0.16	0.05286	0.00083	0.01759	0.0005	337.1	7.5	337.6	7.7	323	22	352.4	9.9	100.148	104.52
68	PL-1	8559c_TRA_Data	13/11/2018 (3)	28.136	142	682	65.2	0.0956012	55	357000	6490.91	0.3921	0.005	0.05336	0.00097	0.31231	18.7406	0.12	0.05345	0.00075	0.01677	0.00072	335.8	3.6	335.1	5.9	348	20	336.1	14	99.7915	96.2931
69	PL-2	8560c_TRA_Data	13/11/2018 (3)	20.757	105	710	66.2	0.0932394	11	373900	33990.9	0.3958	0.0053	0.05384	0.001	0.32123	18.5736	0.14	0.05331	0.00075	0.0175	0.00078	338.5	3.8	338	6.1	344	18	350.6	16	99.8523	98.2558
70	PL-3	8560c_TRA_Data	13/11/2018 (3)	25.623	129	656	64.1	0.0977134	7	348700	49814.3	0.3935	0.0054	0.05347	0.00097	0.32813	18.7021	0.12	0.05347	0.00077	0.01661	0.00072	336.8	3.9	335.8	5.9	348	19	333	14	99.7031	96.4943
71	PL-1	8561c_TRA_Data	13/11/2018 (3)	23.818	120	672	64.9	0.0965774	9	353800	39311.1	0.3962	0.009	0.05327	0.00074	0.32987	18.7723	0.11	0.05362	0.0012	0.01673	0.00047	338.8	6.5	334.6	4.5	354	29	335.3	9.3	98.7603	94.5198
72	PL-2	8562c_TRA_Data	14/11/2018 (4)	26.05	131	647	62.8	0.0970634	19	346000	18210.5	0.3926	0.009	0.05282	0.00074	0.29063	18.9322	0.12	0.05336	0.0012	0.01699	0.00046	336.2	6.6	331.8	4.6	341	31	340.6	9.2	98.6913	97.3021
73	PL-3	8562c_TRA_Data	14/11/2018 (4)	7.8304	40	880	72	0.0818182	29	428000	14758.6	0.3922	0.01	0.0539	0.0011	0.37953	18.5529	0.29	0.05403	0.0014	0.01712	0.00075	335.9	7.3	338.4	6.6	375	33	343	15	100.744	90.24
74	PL-1	8563c_TRA_Data	14/11/2018 (4)	28.125	142	655	62.4	0.0952672	26	345000	13269.2	0.3948	0.0086	0.05351	0.0011	0.35255	18.6881	0.12	0.0535	0.00059	0.01679	0.00036	338.1	6.4	336	6.6	348	15	336.4	7.1	99.3789	96.5517
75	PL-2	8564c_TRA_Data	14/11/2018 (4)	28.123	142	663	63.1	0.0951735	22	348000	15818.2	0.3931	0.0086	0.05336	0.0011	0.31441	18.7406	0.13	0.05341	0.00059	0.01679	0.00039	336.9	6.4	335.1	6.6	349	13	336.6	7.7	99.4657	96.0172
76	PL-3	8564c_TRA_Data	14/11/2018 (4)	28.163	142	674	63.8	0.0946588	23	354000	15391.3	0.3885	0.0084	0.05312	0.0011	0.32763	18.8253	0.13	0.05301	0.00058	0.01697	0.00041	333.5	6.3	333.6	6.6	328	15	340.1	8.2	100.03	101.707
77	PL-1	8565c_TRA_Data	14/11/2018 (4)	28.132	142	641	61.5	0.0959438	35	338000	9657.14	0.3956	0.0075	0.05381	0.00081	0.18451	18.5839	0.1	0.05344	0.00073	0.01638	0.00057	338.4	5.4	337.9	5	345	19	328.3	11	99.8522	97.942
78	PL-2	8566c_TRA_Data	14/11/2018 (4)	28.02	141	642	62.4	0.0971963	20	341000	17050	0.3925	0.0074	0.05311	0.00081	0.36218	18.8288	0.11	0.0533	0.00071	0.01659	0.00056	336.1	5.4	333.6	5	340	18	332.5	11	99.2562	98.1176
79	PL-3	8566c_TRA_Data	14/11/2018 (4)	28.522	144	666	66.2	0.0993994	30	349000	11633.3	0.4009	0.0075	0.05432	0.00083	0.27535	18.4094	0.12	0.05347	0.00071	0.01643	0.00054	342.3	5.4	341	5.1	344	17	329.5	11	99.6202	99.1279
80	PL-1	8567c_TRA_Data	14/11/2018 (4)	20.296	102	655	66.5	0.101527	10	363500	36350	0.3911	0.0091	0.05334	0.0014	0.24535	18.7477	0.12	0.05304	0.00048	0.01654	0.00045	335.1	6.6	335	8.7	334	11	331.6	8.9	99.9702	100.299
81	PL-2	8568c_TRA_Data	14/11/2018 (4)	25.406	128	631	59.3	0.0939778	13	355000	27307.7	0.3941	0.0091	0.05386	0.0014	0.38455	18.5666	0.14	0.05299	0.00047	0.01629	0.0004	337.3	6.6	338.2	8.8	328	11	326.6	7.9	100.267	103.11
82	PL-3	8568c_TRA_Data	14/11/2018 (4)	14.284	72	776	71.4	0.0920103	10	421000	42100	0.3969	0.0095	0.05444	0.0015	0.4793	18.3688	0.17	0.05279	0.00053	0.01692	0.00049	339.3	6.9	341.7	9.1	319	13	339.1	9.7	100.707	107.116
83	PL-1	8506c_TRA_Data	06/11/2018 (3)	6.3685	31	1133	114.8	0.101324	30	739000	24633.3	0.4138	0.0066	0.05466	0.00091	0.43417	18.2949	0.28	0.05305	0.0011	0.01776	0.00046	351.5	4.7	343	5.6	330	28	355.7	9.1	97.5818	103.939
84	PL-2	8506c_TRA_Data	06/11/2018 (3)	5.4652	27	1380	159	0.115217	100	916000	9160	0.4181	0.0075	0.05451	0.001	0.66695	18.3453	0.34	0.05387	0.00093	0.01719	0.00057	354.6	5.4	342.1	6.4	365	19	344	11	96.4749	93.726
85	PL-3	8507c_TRA_Data	06/11/2018 (3)	25.284	128	852	84.7	0.0994131	57	612000	10736.8	0.4143	0.0045	0.05591	0.00058	0.35574	17.8859	0.14	0.05368	0.00075	0.01683	0.00033	351.9	3.2	350.7	3.6	355	20	337.4	6.6	99.659	98.7887
86	PL-1	8572c_TRA_Data	16/11/2018 (6)	28.165	142	662	63.1	0.0953172	1	594000	594000	0.3948	0.007	0.05372	0.0013	0.33675	18.615	0.1	0.05334	0.0006	0.01711	0.00046	337.8	5.1	337.3	7.7	340.9	14	342.8	9.1	99.852	98.944
87	PL-2	8573c_TRA_Data	16/11/2018 (6)	28.126	142	668	68.8	0.102994	31	602000	19419.4	0.3971	0.007	0.05358	0.0013	0.53508	18.6637	0.095	0.05358	0.00056	0.01715	0.00048	339.5	5.1	336.6	7.5	352.2	13	343.7	9.5	99.1458	95.5707
88	PL-3	8573c_TRA_Data	16/11/2018 (6)	28.124	142	646	72.1	0.11161	11	578000	52545.5	0.3966	0.007	0.05373	0.0013	0.33335	18.6116	0.12	0.0535	0.00061	0.01679	0.00045	339.1	5.1	337.4	7.8	350.6	13	336.5	9	99.4987	96.235
89	PL-1	8508c_TRA_Data	06/11/2018 (3)	22.495	110	1027	138.4	0.134761	26	711000	27346.2	0.3908	0.0092	0.05281	0.0016	0.52507	18.9358	0.12	0.05371	0.00075	0.01762	0.00035	334.9	6.7	331.7	9.6	357	23	353	7	99.0445	92.9132
90	PL-2	8509c_TRA_Data	06/11/2018 (3)	26.014	132	887	88.2	0.0994363	35	581000	16600	0.388	0.009	0.05284	0.0016	0.31032	18.9251	0.12	0.05325	0.00075	0.01699	0.00031	332.8	6.6	331.9	9.6	342.7	19	340.5	6.2	99.7296	96.8486
91	PL-3	8509c_TRA_Data	06/11/2018 (3)	24.761	125	882	86.9	0.0985261	5	579000	115800	0.3894	0.009	0.05314	0.0016	0.34124	18.8182	0.13	0.05329	0.00076	0.01671	0.00031	333.9	6.6	333.7	9.7	340	19	334.9	6.1	99.9401	98.1471
92	PL-1	8574c_TRA_Data	16/11/2018 (6)	28.128	142	632	60.1	0.0950949	5	568000	113600	0.3957	0.0071	0.05374	0.00096	0.39014	18.6081	0.11	0.05268	0.00067	0.01687	0.00036	338.5	5.2	337.4	5.9	316.6	15	338	7.1	99.675	106.57
93	PL-2	8575c_TRA_Data	16/11/2018 (6)	28.122	142	645	63.9	0.0990698	1	573000	573000	0.3977	0.0072	0.05428	0.00095	0.27463	18.423	0.087	0.05377	0.00071	0.01658	0.00034	339.9	5.2	340.7	5.8	358	16	332.3	6.7	100.235	95.1676
94	PL-3	8575c_TRA_Data	16/11/2018 (6)	18.65	94	708	75.5	0.106638	22	609000	27681.8	0.3979	0.0073	0.0541	0.00097	0.14809	18.4843	0.11	0.05322	0.00074	0.0167	0.00037	340.4	5.5	339.6	5.9	339	17	334.7	7.4	99.765	100.177
95	PL-1	8510c_TRA_Data	06/11/2018 (3)	12.653	64	1093	98.3	0.089936	36	673000	18694.4	0.3896	0.0097	0.05275	0.0014	0.34636	18.9574	0.18	0.05334	0.00054	0.0174	0.00062	334	7	331.4	8.5	346	15	348.7	12	99.2216	95.7803
96	PL-2	8511c_TRA_Data	06/11/2018 (3)	27.189	138	869	86.2	0.0991945	24	561000	23375	0.3909	0.0095	0.05315	0.0013	0.38578	18.8147	0.1	0.05333	0.00039	0.0166	0.00052	334.9	6.9	333.8	8.2	343.9	9.5	332.8	10	99.6715	97.0631
97	PL-3	8511c_TRA_Data	06/11/2018 (3)	26.511	134	873	86.3	0.0988545	30	561000	18700	0.3916	0.0096	0.05309	0.0013	0.30071	18.8359	0.1	0.05353	0.00041	0.01722	0.00054	335.5	7	333.5	8.1	350	11	345.1	11	99.4039	95.2857
98	PL-1	8577c_TRA_Data	16/11/2018 (6)	28.262	142	353	24.93	0.0706232	2	542000	271000	0.396	0.0033	0.05383	0.00072	0.40624	18.577	0.11	0.0533	0.00043	0.01615	0.00067	338.7	2.4	338	4.4	340.6	9.5	323.8	13	99.7933	99.2366
99	PL-2	8577c_TRA_Data	16/11/2018 (6)	28.124	142	608	55.7	0.0916118	12	539000	44916.7	0.3966	0.0034	0.05366	0.00071	0.39482	18.6359	0.1	0.05358	0.00043	0.01743	0.00071	339.1	2.5	336.9	4.3	353.3	10	349.2	14	99.3512	95.3581
100	PL-3	8577c_TRA_Data	16/11/2018 (6)	28.127	142	662	62.9	0.0950151	3	535000	178333	0.3973	0.0036	0.05391	0.00071	0.38777	18.5494	0.1	0.05351	0.00044	0.01614	0.00065	339.6	2.6	338.5	4.3	347.6	10	323.6	13	99.6761	97.382
101	PL-1	8512c_TRA_Data	06/11/2018 (3)	7.4049	37	1281	101.1	0.0789227	-8	712000	-89000	0.3901	0.013	0.0529	0.0014	0.44841	18.9036	0.35	0.0538	0.0012	0.01884	0.00059	334.3	9.5	332.3	8.9	361	27	377	12	99.4017	92.0499
102	PL-2	8513c_TRA_Data	06/11/2018 (3)	7.629	39	1397	121.1	0.0866858	14	688000	49142.9	0.3767	0.012	0.05165	0.0013	0.40562	19.3611	0.3	0.05318	0.0011	0.01865	0.00065	324.6	8.9	324.6	7.9	335	32	373	13	100	96.8955
103	PL-3	8513c_TRA_Data	06/11/2018 (3)	3.6015	18	1441	132	0.0916031	120	676000	5633.33	0.3872	0.013	0.05293	0.0013	0.17928	18.8929	0.28	0.053	0.0012	0.01665	0.00064	332.3	9.5	332.5	8.1	324	21	334	13	100.06	102.623
104	PL-1	8578c_TRA_Data	16/11/2018 (6)	28.081	141	660	63.9	0.0968182	3	538000	179333	0.3981	0.045	0.05436	0.0015	0.27703	18.3959	0.1	0.05308	0.0048	0.01715	0.0028	340.2	15	341.2	8.9	331.6	15	343.6	55	100.294	102.895
105	PL-2	8578c_TRA_Data	16/11/2018 (6)	27.411	138	611	56.5	0.0924714	1	538000	538000	0.3987	0.022	0.05381	0.0014	0.43354	18.5839	0.1	0.05321	0.0048	0.01693	0.0028	340.7	15	337.8	8.8	337.3	15	339.3	55	99.1488	100.148
106	PL-3	8579c_TRA_Data	16/11/2018 (6)	23.038	116	577	62.8	0.108839	26	506000	19461.5	0.3947	0.023	0.05381	0.0014	0.42982	18.5839	0.11	0.05301	0.0048	0.01662	0.0027	337.7	15	337.9	8.8	327	16	333.2	54	100.059	103.333
107	PL-1	8514c_TRA_Data	06/11/2018 (3)	7.4742	37	1253	126.5	0.100958	46	592000	12869.6	0.3991	0.0099	0.05416	0.0011	0.51287	18.4638	0.33	0.05285	0.0013	0.01595	0.00069	340.9	7.2	340	7	322	31	320	14	99.736	105.59
108	PL-2	8515c_TRA_Data	06/11/2018 (3)	3.8953	20	1294	128.9	0.0996136	100	592000	5920	0.408	0.012	0.055	0.0013	0.34169	18.1818	0.36	0.0539	0.0017	0.01615	0.00076	347	8.6	345.1	7.6	363	47	324	15	99.4524	95.0689
109	PL-3	8515c_TRA_Data	06/11/2018 (3)	3.3936	17	1434	148	0.103208	70	655000	9357.14	0.398	0.013	0.05382	0.001	0.78989	18.5804	0.3	0.0543	0.0014	0.01541	0.0009	340.2	9.8	337.9	6.3	395	35	309	18	99.3239	85.5443
110	PL-1	8580c_TRA_Data	16/11/2018 (6)	25.039	126	629	63.9	0.10159	14	526000	37571.4	0.3987	0.0036	0.05416	0.00029	0.33816	18.4638	0.099	0.0535	0.00052	0.01683	0.00054	340.6	2.6	340	1.8	349.9	12	337.3	11	99.8238	97.1706
111	PL-2	8581c_TRA_Data	16/11/2018 (6)	26.667	134	630	59	0.0936508	11	545000	49545.5	0.394	0.0036	0.05395	0.00029	0.32704	18.5357	0.1	0.05264	0.0005	0.01679	0.00053	337.3	2.6	338.7	1.8	318	14	336.5	10	100.415	106.509
112	PL-1	8516c_TRA_Data	06/11/2018 (3)	25.366	128	1122	119.8	0.106774	14	473000	33785.7	0.3883	0.0099	0.05277	0.001	0.39389	18.9502	0.11	0.05344	0.00045	0.01706	0.00035	333	7.2	331.5	6.4	347	10	341.9	6.9	99.5495	95.5331
113	PL-2	8517c_TRA_Data	06/11/2018 (3)	10.572	54	1356	133	0.0980826	47	544000	11574.5	0.3893	0.01	0.05314	0.0012	0.23884	18.8182	0.24	0.05347	0.00093	0.01686	0.00048	333.8	7.6	333.7	7.6	348	23	338	9.5	99.97	95.8908
114	PL-3	8517c_TRA_Data	06/11/2018 (3)	20.351	103	886	104.5	0.117946	42	407000	9690.48	0.3967	0.01	0.05376	0.0011	0.32256	18.6012	0.13	0.05318	0.00045	0.01658	0.00037	339.2	7.3	337.6	6.7	333	10	332.3	7.3	99.5283	101.381
115	PL-1	8518c_TRA_Data	06/11/2018 (3)	27.686	139	1017	108.7	0.106883	14	441000	31500	0.3877	0.01	0.05286	0.0011	0.17405	18.9179	0.1	0.05315	0.00087	0.0169	0.00066	332.6	7.5	332.1	6.8	338	22	338.7	13	99.8497	98.2544
116	PL-3	8519c_TRA_Data	06/11/2018 (3)	27.065	136	1040	111.8	0.1075	20	447000	22350	0.3885	0.01	0.05279	0.0011	0.17366	18.943	0.11	0.0544	0.0009	0.01686	0.00066	333.2	7.5	331.6	6.9	386	20	338	13	99.5198	85.9067
117	PL-1	8520c_TRA_Data	06/11/2018 (3)	12.083	61	1319	125.5	0.0951478	47	541000	11510.6	0.3834	0.0053	0.05228	0.00059	0.008923	19.1278	0.17	0.05354	0.0008	0.01694	0.00083	329.4	3.9	328.5	3.6	352	23	340	17	99.7268	93.3239
118	PL-2	8521c_TRA_Data	06/11/2018 (3)	25.549	128	1211	141.4	0.116763	51	527000	10333.3	0.3784	0.0044	0.05237	0.00049	0.24603	19.0949	0.13	0.05308	0.00057	0.01713	0.0007	325.8	3.2	329	3	331.3	12	343.3	14	100.982	99.3058
119	PL-3	8521c_TRA_Data	06/11/2018 (3)	9.9289	50	1322	127.1	0.0961422	34	553000	16264.7	0.4016	0.0061	0.05341	0.00065	0.06673	18.7231	0.19	0.05271	0.00086	0.01713	0.00079	342.7	4.4	335.4	4	313	22	343.4	16	97.8699	107.157
120	PL-1	8522c_TRA_Data	06/11/2018 (3)	12.09	61	1655	162	0.0978852	36	525000	14583.3	0.3861	0.0089	0.05232	0.0029	0.28216	19.1132	0.19	0.05307	0.00094	0.01689	0.00047	331.5	6.5	328.8	18	328	22	338.5	9.4	99.1855	100.244
121	PL-2	8523c_TRA_Data	06/11/2018 (3)	10.199	51	1114	105.2	0.0944345	28	536000	19142.9	0.3863	0.0084	0.0533	0.003	0.28803	18.7617	0.2	0.05293	0.00084	0.01671	0.00057	331.6	6.2	334.8	18	332	19	335	11	100.965	100.843
122	PL-1	8524c_TRA_Data	06/11/2018 (3)	15.335	78	1271	126.3	0.0993706	36	554000	15388.9	0.3887	0.011	0.05333	0.0014	0.1445	18.7512	0.15	0.05367	0.00094	0.01757	0.00084	333.3	7.7	334.9	8.6	355	24	352	17	100.48	94.338
123	PL-2	8524c_TRA_Data	06/11/2018 (3)	11.984	61	1295	123.6	0.095444	39	547000	14025.6	0.3913	0.011	0.05328	0.0014	0.26097	18.7688	0.2	0.05263	0.00099	0.0177	0.0009	335.3	7.9	334.6	8.8	313	25	354.7	18	99.7912	106.901
	Temora-2 zircon (206Pb/238U= 416.78 ± 0.33 (2s) Ma; Black et al., 2004)
1	Tem-1	8462c_TRA_Data	04/11/2018 (1)	6.4707	32	297	122.9	0.413805	192	216200	1126.04	0.5	0.016	0.0654	0.0021	0.40767	15.2905	0.29	0.0554	0.0013	0.02332	0.00087	411.3	11	408.3	13	431	39	466	17	99.2706	94.7332
2	Tem-2	8463c_TRA_Data	04/11/2018 (1)	10.639	53	290.2	99.4	0.342522	94	191200	2034.04	0.501	0.016	0.06406	0.0019	0.54441	15.6104	0.22	0.0562	0.0012	0.02324	0.00076	412.2	11	400.2	12	454	30	464	15	97.0888	88.1498
3	Tem-1	8464c_TRA_Data	04/11/2018 (1)	3.9126	20	241	63.3	0.262656	170	149200	877.647	0.504	0.02	0.0655	0.0019	0.65321	15.2672	0.4	0.0555	0.0016	0.0228	0.0015	414	13	409	11	433	30	456	30	98.7923	94.4573
4	Tem-2	8465c_TRA_Data	04/11/2018 (1)	5.8479	30	268.4	70.2	0.26155	80	165600	2070	0.492	0.016	0.065	0.0013	0.14323	15.3846	0.3	0.0545	0.0016	0.0231	0.0011	405.9	11	405.8	8.1	392	36	462	22	99.9754	103.52
5	Tem-1	8467c_TRA_Data	04/11/2018 (1)	8.3697	42	129.8	54.6	0.420647	65	163100	2509.23	0.49	0.015	0.0656	0.0017	0.32609	15.2439	0.25	0.0551	0.0013	0.02287	0.00072	404.9	10	409.6	10	415	30	457	14	101.161	98.6988
6	Tem-2	8468c_TRA_Data	04/11/2018 (1)	7.4509	38	304.5	128.8	0.422989	5	173700	34740	0.487	0.015	0.063	0.0018	0.32103	15.873	0.31	0.0554	0.0013	0.02413	0.00073	402.8	10	394.1	11	424	35	482	14	97.8401	92.9481
7	Tem-1	8469c_TRA_Data	04/11/2018 (1)	4.8982	25	335	89.3	0.266567	10	211600	21160	0.503	0.021	0.0651	0.0022	0.24317	15.361	0.33	0.0564	0.0017	0.024	0.0013	413.6	14	406.5	13	451	31	478	25	98.2834	90.133
8	Tem-2	8470c_TRA_Data	04/11/2018 (1)	2.6725	13	589	142.2	0.241426	100	364000	3640	0.513	0.024	0.0664	0.0023	0.33111	15.0602	0.34	0.0562	0.0018	0.025	0.0011	420	16	414.2	14	454	35	499	23	98.619	91.2335
9	Tem-1	8472c_TRA_Data	04/11/2018 (1)	20.801	105	509	175	0.343811	14	352800	25200	0.5026	0.0069	0.06639	0.0015	0.34714	15.0625	0.14	0.0552	0.00087	0.02174	0.00076	413.3	4.7	414.3	8.8	420	19	434.6	15	100.242	98.6429
10	Tem-2	8473c_TRA_Data	04/11/2018 (1)	20.488	104	528	170.8	0.323485	22	361100	16413.6	0.5072	0.0073	0.06643	0.0015	0.16544	15.0534	0.13	0.05506	0.00093	0.02243	0.00077	416.4	4.9	414.6	8.8	411	22	448.3	15	99.5677	100.876
11	Tem-1	8474c_TRA_Data	04/11/2018 (1)	16.243	82	554	207	0.373646	23	391000	17000	0.5042	0.0061	0.06682	0.0012	0.38093	14.9656	0.19	0.05509	0.00072	0.02177	0.00083	414.4	4.1	416.9	7	413	15	435.4	16	100.603	100.944
12	Tem-2	8475c_TRA_Data	04/11/2018 (1)	19.863	101	190.5	90.1	0.472966	10	132200	13220	0.4928	0.0081	0.06617	0.0012	0.51312	15.1126	0.2	0.05412	0.00077	0.02164	0.00085	406.5	5.5	413	7.2	375	17	432.7	17	101.599	110.133
13	Tem-1	8477c_TRA_Data	04/11/2018 (1)	17.004	86	323	124.7	0.386068	17	214500	12617.6	0.5059	0.007	0.06717	0.00082	0.35795	14.8876	0.15	0.05495	0.00074	0.02265	0.00087	415.5	4.7	419	5	404	18	453	17	100.842	103.713
14	Tem-2	8478c_TRA_Data	04/11/2018 (1)	16.009	81	371	166	0.447439	28	234700	8382.14	0.5077	0.0062	0.06716	0.00098	0.33175	14.8898	0.19	0.05547	0.00079	0.02253	0.00081	416.7	4.2	419	5.9	431	16	450.2	16	100.552	97.2158
15	Tem-1	8479c_TRA_Data	04/11/2018 (1)	28.115	142	253.2	103.8	0.409953	3	169600	56533.3	0.5129	0.0091	0.06699	0.00094	0.52463	14.9276	0.14	0.05552	0.0011	0.02337	0.00062	420.1	6.1	418	5.7	435	26	466.8	12	99.5001	96.092
16	Tem-2	8479c_TRA_Data	04/11/2018 (1)	16	80	168.8	49.6	0.293839	40	99300	2482.5	0.4893	0.011	0.06387	0.0011	0.51291	15.6568	0.22	0.05491	0.0013	0.02236	0.00067	404.1	7.6	399.1	6.5	411	38	446.8	13	98.7627	97.1046
17	Tem-1	8481c_TRA_Data	04/11/2018 (1)	24.782	125	217.2	110.7	0.509669	31	144700	4667.74	0.5108	0.01	0.06674	0.0011	0.47052	14.9835	0.14	0.05498	0.00098	0.02121	0.0014	418.7	6.9	416.5	6.4	410	23	424.1	28	99.4746	101.585
18	Tem-2	8482c_TRA_Data	04/11/2018 (1)	13.884	69	240.1	69.5	0.289463	71	168900	2378.87	0.5083	0.011	0.06752	0.0012	0.39647	14.8104	0.19	0.05473	0.0012	0.02086	0.0015	417.1	7.7	421.2	7.4	399	29	417	29	100.983	105.564
19	Tem-1	8483c_TRA_Data	04/11/2018 (1)	18.77	95	492	125.3	0.254675	24	330000	13750	0.5117	0.0088	0.06707	0.001	0.37523	14.9098	0.16	0.05575	0.00082	0.0218	0.00086	420.1	6.2	418.5	6.1	439	18	435.8	17	99.6191	95.3303
20	Tem-2	8484c_TRA_Data	04/11/2018 (1)	28.46	143	377	101	0.267905	36	241000	6694.44	0.5146	0.011	0.0673	0.0013	0.83972	14.8588	0.26	0.05551	0.00068	0.02174	0.00081	420.9	7.7	419.9	7.9	436	17	434.6	16	99.7624	96.3073
21	Tem-1	8485c_TRA_Data	04/11/2018 (1)	6.5693	33	489.7	141.3	0.288544	20	274300	13715	0.489	0.018	0.0645	0.0026	0.25111	15.5039	0.28	0.0548	0.0014	0.02278	0.00093	404.1	12	402.7	16	405	30	455	18	99.6536	99.4321
22	Tem-2	8485c_TRA_Data	04/11/2018 (1)	7.7519	39	563	197.3	0.350444	64	305000	4765.62	0.4789	0.018	0.06271	0.0025	0.58403	15.9464	0.24	0.05518	0.0011	0.02273	0.00078	397.1	12	392	15	418	22	454.2	15	98.7157	93.7799
23	Tem-1	8582c_TRA_Data	16/11/2018 (6)	11.25	57	209.8	124.9	0.595329	42	220900	5259.52	0.5099	0.019	0.06614	0.001	0.17033	15.1194	0.14	0.05561	0.0012	0.02191	0.00043	418.2	13	412.8	6.3	436	26	438.1	8.5	98.7088	94.6789
24	Tem-2	8583c_TRA_Data	16/11/2018 (6)	22.294	112	336	73.1	0.21756	22	321000	14590.9	0.5057	0.019	0.06576	0.001	0.40421	15.2068	0.14	0.05567	0.0011	0.02216	0.00045	415.4	13	410.5	6.2	436	25	443	9	98.8204	94.1514
25	Tem-1	8584c_TRA_Data	16/11/2018 (6)	11.172	56	349	155.8	0.446418	5	322500	64500	0.5054	0.03	0.06544	0.0011	0.40295	15.2812	0.21	0.05581	0.0061	0.02176	0.004	415.2	40	408.6	6.6	444	28	435	39	98.4104	92.027
26	Tem-2	8585c_TRA_Data	16/11/2018 (6)	7.824	39	322	146.4	0.454658	8	301000	37625	0.4959	0.025	0.06623	0.0011	0.27433	15.0989	0.21	0.05378	0.0058	0.0211	0.0039	408.8	40	413.4	6.9	374	28	422	35	101.125	110.535
27	Tem-1	8537c_TRA_Data	13/11/2018 (3)	26.884	135	85.2	28.02	0.328873	39	73500	1884.62	0.5089	0.0086	0.06796	0.00077	0.37059	14.7145	0.17	0.05462	0.00094	0.02023	0.00048	417.2	5.8	423.8	4.6	393	21	404.8	9.6	101.582	107.837
28	Tem-2	8537c_TRA_Data	13/11/2018 (3)	11.086	56	115.5	33.65	0.291342	42	90300	2150	0.497	0.015	0.0643	0.0013	0.47634	15.5521	0.31	0.0558	0.0016	0.02289	0.00072	409	10	401.5	7.7	437	41	457	14	98.1663	91.8764
29	Tem-1	8540c_TRA_Data	13/11/2018 (3)	16.621	83	67.9	23.28	0.342857	44	59800	1359.09	0.521	0.014	0.0678	0.0018	0.38551	14.7493	0.22	0.056	0.0015	0.02121	0.00077	424.8	9.6	422.6	11	441	43	424	15	99.4821	95.8277
30	Tem-2	8541c_TRA_Data	13/11/2018 (3)	11.345	57	122.3	32.4	0.264922	8	99400	12425	0.497	0.012	0.0655	0.0019	0.36988	15.2672	0.32	0.0551	0.0015	0.02237	0.00074	409.2	8.2	409.1	12	413	35	447	15	99.9756	99.0557
31	Tem-1	8543c_TRA_Data	13/11/2018 (3)	28.113	142	133.2	43.8	0.328829	8	111800	13975	0.5045	0.011	0.06666	0.0012	0.32996	15.0015	0.14	0.05528	0.0007	0.01951	0.00069	415	7.5	416	7.5	422	16	390.4	14	100.241	98.5782
32	Tem-2	8544c_TRA_Data	13/11/2018 (3)	13.093	66	128.4	33.41	0.260202	1	98700	98700	0.494	0.015	0.0645	0.0018	0.46319	15.5039	0.34	0.0558	0.0014	0.02405	0.001	407	10	402.7	11	442	28	480	21	98.9435	91.1086
33	Tem-1	8545c_TRA_Data	13/11/2018 (3)	14.844	75	202.1	53.29	0.263681	78	158500	2032.05	0.5008	0.014	0.06588	0.0013	0.1879	15.1791	0.19	0.05518	0.001	0.02125	0.00094	412	9.3	411.2	8.1	417	24	425	19	99.8058	98.6091
34	Tem-2	8545c_TRA_Data	13/11/2018 (3)	11.372	57	149.7	34.37	0.229593	4	112900	28225	0.497	0.017	0.0649	0.0018	0.40991	15.4083	0.35	0.0557	0.0015	0.02364	0.0012	409.3	11	405.2	11	434	36	472	23	98.9983	93.3641
35	Tem-1	8547c_TRA_Data	13/11/2018 (3)	28.166	141	273.5	140.7	0.514442	1	207700	207700	0.5072	0.011	0.06647	0.001	0.44242	15.0444	0.12	0.05512	0.00049	0.02004	0.0003	416.4	7.6	414.8	6.2	423	12	401	5.9	99.6158	98.0615
36	Tem-2	8547c_TRA_Data	13/11/2018 (3)	11.929	60	226.4	57.2	0.25265	1	154700	154700	0.496	0.014	0.0643	0.0017	0.39063	15.5521	0.36	0.056	0.0013	0.02558	0.00086	408.6	9.8	401.7	11	470	30	510	17	98.3113	85.4681
37	Tem-1	8549c_TRA_Data	13/11/2018 (3)	18.228	91	116.1	58.9	0.507321	3	87100	29033.3	0.5147	0.018	0.06495	0.0017	0.30438	15.3965	0.18	0.05731	0.0012	0.02088	0.00057	421.3	12	405.6	10	503	24	417.5	11	96.2734	80.6362
38	Tem-2	8550c_TRA_Data	13/11/2018 (3)	13.517	68	182.1	68.1	0.37397	23	129100	5613.04	0.5	0.019	0.0656	0.002	0.55224	15.2439	0.31	0.0558	0.0014	0.02383	0.0008	411.1	13	409.5	12	441	30	476	16	99.6108	92.8571
39	Tem-1	8551c_TRA_Data	13/11/2018 (3)	28.116	142	130.5	57.6	0.441379	13	94300	7253.85	0.5056	0.03	0.06701	0.0022	0.36226	14.9231	0.17	0.055	0.011	0.02	0.0084	415.1	81	418	13	404	29	400.2	17	100.699	103.465
40	Tem-2	8552c_TRA_Data	13/11/2018 (3)	7.7813	39	144.1	58.6	0.406662	24	93900	3912.5	0.485	0.03	0.0651	0.0028	0.4855	15.361	0.43	0.0552	0.012	0.02227	0.0094	401	80	407	17	416	27	445	18	101.496	97.8365
41	Tem-1	8553c_TRA_Data	13/11/2018 (3)	28.112	142	99.3	27.6	0.277946	33	69600	2109.09	0.5046	0.013	0.06612	0.00098	0.37537	15.124	0.15	0.0556	0.0015	0.02094	0.005	414.3	8.5	412.7	5.9	432	35	419	98	99.6138	95.5324
42	Tem-1	8555c_TRA_Data	13/11/2018 (3)	27.603	139	97.4	31.61	0.324538	9	64400	7155.56	0.4899	0.021	0.06151	0.0023	0.41107	16.2575	0.19	0.05486	0.001	0.02018	0.00062	404.2	15	384.7	14	411	26	404	12	95.1757	93.601
43	Tem-2	8556c_TRA_Data	13/11/2018 (3)	10.802	55	111.7	31.06	0.278066	4	70900	17725	0.496	0.023	0.0645	0.0028	0.25085	15.5039	0.37	0.0554	0.0018	0.02168	0.001	408.3	16	402.8	17	425	40	433	20	98.653	94.7765
44	Tem-1	8557c_TRA_Data	13/11/2018 (3)	25.952	131	83.2	40.4	0.485577	18	56400	3133.33	0.509	0.016	0.06601	0.0016	0.41778	15.1492	0.18	0.0561	0.0012	0.02098	0.00061	417.1	11	412	9.9	452	28	420	12	98.7773	91.1504
45	Tem-2	8558c_TRA_Data	13/11/2018 (3)	14.792	75	121.4	28.5	0.234761	47	76500	1627.66	0.482	0.016	0.0644	0.0018	0.37519	15.528	0.26	0.0543	0.0014	0.02291	0.001	399	11	402.3	11	375	32	458	20	100.827	107.28
46	Tem-1	8559c_TRA_Data	13/11/2018 (3)	25.151	127	87.7	44.96	0.512657	15	57600	3840	0.498	0.011	0.06577	0.0013	0.44191	15.2045	0.17	0.05494	0.0011	0.01994	0.00089	409.7	7.3	410.6	8.1	408	25	398.9	18	100.22	100.637
47	Tem-2	8560c_TRA_Data	13/11/2018 (3)	8.0708	41	119.8	46.3	0.386477	1	70100	70100	0.499	0.016	0.0651	0.0023	0.35121	15.361	0.46	0.0555	0.0018	0.02301	0.0013	410.5	10	406	14	445	51	460	26	98.9038	91.236
48	Tem-1	8561c_TRA_Data	13/11/2018 (3)	22.9	115	87.3	45.84	0.525086	32	57500	1796.88	0.4997	0.014	0.0647	0.0011	0.39698	15.4559	0.18	0.05563	0.0015	0.02029	0.00063	411	9.2	404.1	6.6	428	37	405.9	12	98.3212	94.4159
49	Tem-2	8562c_TRA_Data	14/11/2018 (4)	9.8585	50	122.4	49.48	0.404248	31	72900	2351.61	0.485	0.018	0.0636	0.0018	0.18456	15.7233	0.39	0.055	0.0023	0.0219	0.0011	401	12	397.3	11	405	56	438	22	99.0773	98.0988
50	Tem-1	8563c_TRA_Data	14/11/2018 (4)	28.127	142	244	72.5	0.297131	35	161300	4608.57	0.5046	0.012	0.06731	0.0014	0.35834	14.8566	0.12	0.0543	0.00072	0.02088	0.00044	414.6	7.9	419.9	8.4	381	18	417.7	8.7	101.278	110.21
51	Tem-2	8564c_TRA_Data	14/11/2018 (4)	7.7472	39	280.8	60.4	0.2151	58	167600	2889.66	0.498	0.016	0.065	0.0018	0.51212	15.3846	0.28	0.0557	0.0012	0.0226	0.0011	410.3	10	406.2	11	437	34	452	22	99.0007	92.9519
52	Tem-1	8565c_TRA_Data	14/11/2018 (4)	25.27	128	158.8	48.8	0.307305	4	103800	25950	0.51	0.011	0.06654	0.0011	0.34968	15.0285	0.14	0.05565	0.00096	0.01998	0.00072	418.1	7.4	415.3	6.7	432	21	399.8	14	99.3303	96.1343
53	Tem-1	8567c_TRA_Data	14/11/2018 (4)	28.121	142	152.5	93.8	0.615082	1	102700	102700	0.4988	0.013	0.06584	0.0018	0.33038	15.1883	0.13	0.05488	0.00072	0.02	0.0004	410.6	8.5	411	11	404	16	400.3	8	100.097	101.733
54	Tem-2	8568c_TRA_Data	14/11/2018 (4)	7.6118	39	172.4	63.9	0.37065	18	107100	5950	0.501	0.018	0.0653	0.0025	0.41454	15.3139	0.44	0.0557	0.0017	0.02301	0.00075	411.9	12	408	15	432	33	460	15	99.0532	94.4444
55	Tem-1	8506c_TRA_Data	06/11/2018 (3)	25.937	130	361	169.8	0.47036	5	305500	61100	0.5084	0.0072	0.06731	0.00082	0.48953	14.8566	0.14	0.05491	0.00086	0.02183	0.00043	417.1	4.8	419.9	5	405	22	436.4	8.5	100.671	103.679
56	Tem-2	8507c_TRA_Data	06/11/2018 (3)	23.952	121	257	69	0.268482	27	221000	8185.19	0.5107	0.008	0.06731	0.00076	0.34874	14.8566	0.13	0.05539	0.00095	0.02256	0.00053	419.3	5.6	419.9	4.6	422	22	450.8	10	100.143	99.5024
57	Tem-1	8572c_TRA_Data	16/11/2018 (6)	28.125	142	59.1	18.7	0.316413	35	66400	1897.14	0.5104	0.012	0.06762	0.0017	0.45674	14.7885	0.17	0.05497	0.00094	0.02115	0.00072	418.2	8	421.7	10	403	24	423	14	100.837	104.64
58	Tem-2	8573c_TRA_Data	16/11/2018 (6)	18.494	93	86.1	23.84	0.276887	7	93800	13400	0.5105	0.013	0.06671	0.0018	0.32651	14.9903	0.21	0.0554	0.0012	0.02333	0.00078	418.3	8.6	416.2	11	424	26	466	16	99.498	98.1604
59	Tem-1	8508c_TRA_Data	06/11/2018 (3)	10.569	53	624	295.9	0.474199	57	475000	8333.33	0.499	0.014	0.0651	0.0022	0.26087	15.361	0.25	0.0549	0.0013	0.0231	0.0006	410.8	9.5	406.3	13	410	28	462	12	98.9046	99.0976
60	Tem-2	8509c_TRA_Data	06/11/2018 (3)	15.004	76	687	310.8	0.452402	40	514000	12850	0.495	0.015	0.0644	0.0021	0.72003	15.528	0.25	0.05559	0.001	0.02282	0.00047	408	10	402.2	13	432	21	456	9.4	98.5784	93.1019
61	Tem-1	8574c_TRA_Data	16/11/2018 (6)	11.711	59	66.5	22.19	0.333684	38	70200	1847.37	0.52	0.015	0.0666	0.0015	0.50076	15.015	0.21	0.056	0.0013	0.02133	0.00081	424.5	10	415.6	8.9	449	32	426	16	97.9034	92.5612
62	Tem-2	8575c_TRA_Data	16/11/2018 (6)	5.2286	26	154.3	34.4	0.222942	63	149700	2376.19	0.495	0.017	0.0642	0.0019	0.20371	15.5763	0.37	0.0561	0.002	0.0243	0.0011	408	12	401.3	11	452	39	485	23	98.3578	88.7832
63	Tem-1	8510c_TRA_Data	06/11/2018 (3)	9.4942	47	811	135.5	0.167078	18	606000	33666.7	0.496	0.015	0.066	0.002	0.62612	15.1515	0.26	0.05435	0.00095	0.02806	0.0011	408.4	11	411.7	12	384	26	559	22	100.808	107.214
64	Tem-2	8511c_TRA_Data	06/11/2018 (3)	7.9338	40	627	134	0.213716	18	448000	24888.9	0.492	0.015	0.0647	0.0021	0.56229	15.4559	0.34	0.0554	0.0012	0.02531	0.001	406	10	404.1	13	424	29	505	20	99.532	95.3066
65	Tem-1	8577c_TRA_Data	16/11/2018 (6)	9.126	46	97.7	23.81	0.243705	68	144000	2117.65	0.508	0.012	0.0675	0.0015	0.70907	14.8148	0.28	0.05471	0.00088	0.02016	0.0011	416.8	7.8	421.1	9.1	405	19	403	21	101.032	103.975
66	Tem-2	8577c_TRA_Data	16/11/2018 (6)	12.916	65	320.7	91.6	0.285625	26	330800	12723.1	0.501	0.0074	0.06547	0.0011	0.27671	15.2742	0.19	0.05561	0.00091	0.02255	0.00098	412.2	5	408.8	6.7	429	21	451	19	99.1752	95.2914
67	Tem-1	8512c_TRA_Data	06/11/2018 (3)	13.07	66	430	139.5	0.324419	37	308000	8324.32	0.4974	0.016	0.06588	0.0016	0.46848	15.1791	0.22	0.05525	0.001	0.02254	0.00053	409.7	11	411.3	9.8	419	21	450	11	100.391	98.1623
68	Tem-2	8513c_TRA_Data	06/11/2018 (3)	5.1506	26	550	126.7	0.230364	44	326000	7409.09	0.487	0.019	0.0638	0.0019	0.27624	15.674	0.32	0.0552	0.0018	0.02316	0.00078	402.4	13	398.7	11	418	46	463	15	99.0805	95.3828
69	Tem-1	8578c_TRA_Data	16/11/2018 (6)	3.5518	18	92.4	28.8	0.311688	40	84300	2107.5	0.506	0.04	0.0667	0.0039	0.52647	14.9925	0.81	0.0542	0.0059	0.0173	0.0031	415	45	416	24	357	45	347	62	100.241	116.527
70	Tem-1	8514c_TRA_Data	06/11/2018 (3)	28.122	142	336	130.7	0.388988	42	202200	4814.29	0.5041	0.009	0.06616	0.00095	0.46703	15.1149	0.15	0.05462	0.0011	0.02164	0.00062	414.3	6.1	412.9	5.7	398	25	432.6	12	99.6621	103.744
71	Tem-2	8515c_TRA_Data	06/11/2018 (3)	15.458	78	428	221.5	0.517523	1	249500	249500	0.5155	0.011	0.06835	0.0012	0.46945	14.6306	0.19	0.05467	0.0012	0.0222	0.00071	421.9	7.2	426.2	7	402	32	444	14	101.019	106.02
72	Tem-1	8580c_TRA_Data	16/11/2018 (6)	7.0094	35	152.3	50.4	0.330926	60	148300	2471.67	0.524	0.014	0.0692	0.0011	0.36308	14.4509	0.26	0.0552	0.0014	0.02195	0.00093	427.3	9.3	431.3	6.4	417	38	439	18	100.936	103.429
73	Tem-2	8581c_TRA_Data	16/11/2018 (6)	24.159	121	147.5	51.53	0.349356	25	152400	6096	0.4991	0.0073	0.0657	0.00054	0.21896	15.2207	0.13	0.05496	0.00086	0.02129	0.00069	410.8	4.9	410.2	3.3	411	18	425.7	14	99.8539	99.8054
74	Tem-1	8516c_TRA_Data	06/11/2018 (3)	6.4809	32	316	128.9	0.407911	22	149900	6813.64	0.496	0.018	0.0644	0.0018	0.35232	15.528	0.29	0.0561	0.0015	0.0227	0.0011	408.4	12	402.1	11	448	36	454	21	98.4574	89.7545
75	Tem-2	8517c_TRA_Data	06/11/2018 (3)	6.739	34	322	125.2	0.38882	41	153600	3746.34	0.485	0.018	0.0648	0.0019	0.33157	15.4321	0.33	0.0544	0.0016	0.02381	0.00094	401	12	404.7	11	382	38	475	19	100.923	105.942
76	Tem-1	8518c_TRA_Data	06/11/2018 (3)	7.5854	38	189.4	46.3	0.244456	19	88800	4673.68	0.49	0.018	0.0632	0.0018	0.084558	15.8228	0.29	0.0564	0.0019	0.0215	0.0014	404.7	12	395	11	459	46	430	27	97.6032	86.0566
77	Tem-2	8519c_TRA_Data	06/11/2018 (3)	13.617	69	164	46.25	0.282012	32	81900	2559.38	0.486	0.016	0.0645	0.0017	0.37538	15.5039	0.26	0.0546	0.0014	0.02139	0.0011	401.5	11	402.9	10	395	29	428	22	100.349	102
78	Tem-1	8520c_TRA_Data	06/11/2018 (3)	5.9356	30	355	151.1	0.425634	70	174400	2491.43	0.492	0.015	0.0653	0.0013	0.32643	15.3139	0.28	0.0549	0.0016	0.02358	0.0013	405.7	10	407.7	7.7	401	33	471	25	100.493	101.671
79	Tem-2	8521c_TRA_Data	06/11/2018 (3)	5.8405	30	186.6	48.4	0.259378	1	93200	93200	0.477	0.012	0.0659	0.0018	0.25874	15.1745	0.41	0.0539	0.0018	0.0214	0.0014	396.1	8.3	412	11	369	37	427	28	104.014	111.653
80	Tem-1	8522c_TRA_Data	06/11/2018 (3)	7.6175	38	347	80.3	0.231412	81	136600	1686.42	0.496	0.017	0.0657	0.0039	0.47926	15.2207	0.34	0.0547	0.0016	0.0242	0.0013	408.7	12	410.2	24	396	42	483	25	100.367	103.586
81	Tem-2	8523c_TRA_Data	06/11/2018 (3)	11.565	58	419	124.3	0.296659	9	242000	26888.9	0.505	0.014	0.067	0.0039	0.45652	14.9254	0.28	0.0551	0.0013	0.02526	0.00083	414.9	9.5	418.1	24	417	31	504	16	100.771	100.264
82	Tem-1	8524c_TRA_Data	06/11/2018 (3)	7.5128	38	190.6	45.7	0.239769	16	98400	6150	0.5	0.02	0.0658	0.0024	0.43836	15.1976	0.41	0.0557	0.0019	0.0247	0.0016	411	14	411	15	440	49	494	32	100	93.4091
83	Tem-2	8524c_TRA_Data	06/11/2018 (3)	8.7878	44	268.8	128.6	0.478423	11	133000	12090.9	0.507	0.019	0.0637	0.002	0.40026	15.6986	0.28	0.0571	0.0016	0.02399	0.0013	415.9	13	398.1	12	474	44	479	26	95.7201	83.9873
	Oracle zircon (207Pb/206Pb= 1437.05 ± 0.77 (2s) Ma; Arizona LaserChron Center website, laserchron.org)
1	Oracle-1	8462c_TRA_Data	04/11/2018 (1)	24.794	125	223.1	161.7	0.724787	202	633000	3133.66	2.957	0.07	0.2387	0.0066	0.63084	4.18936	0.035	0.0902	0.00093	0.07534	0.0015	1396.2	18	1380	34	1430.9	9.6	1468	29	98.8397	96.4428
2	Oracle-2	8463c_TRA_Data	04/11/2018 (1)	9.1711	46	428	235.4	0.55	90	858000	9533.33	3.057	0.084	0.2446	0.0076	0.74154	4.08831	0.066	0.0907	0.0012	0.0784	0.002	1421	21	1410	39	1439	16	1525	37	99.2259	97.9847
3	Oracle-1	8464c_TRA_Data	04/11/2018 (1)	7.9907	40	173	103.9	0.600578	63	477000	7571.43	3.093	0.084	0.2467	0.0049	0.75505	4.05351	0.07	0.0901	0.0014	0.0778	0.0021	1430	21	1421	25	1429	17	1513	40	99.3706	99.4402
4	Oracle-2	8465c_TRA_Data	04/11/2018 (1)	13.699	70	276	183	0.663043	63	639000	10142.9	3.008	0.063	0.2411	0.0033	0.61086	4.14766	0.043	0.0907	0.0011	0.076	0.0018	1409.3	16	1392	17	1439	12	1481	34	98.7724	96.7338
5	Oracle-1	8467c_TRA_Data	04/11/2018 (1)	6.7127	34	154	81.1	0.526623	28	548000	19571.4	3.003	0.085	0.2446	0.0065	0.57721	4.08831	0.071	0.0895	0.0015	0.0725	0.0014	1408	21	1410	33	1416	19	1415	27	100.142	99.5763
6	Oracle-2	8468c_TRA_Data	04/11/2018 (1)	22.576	114	209.8	112.7	0.537178	78	592000	7589.74	2.942	0.067	0.2354	0.005	0.62717	4.24809	0.034	0.08948	0.00066	0.07192	0.00094	1392.2	17	1362.3	26	1415.8	8.4	1404	18	97.8523	96.2212
7	Oracle-1	8469c_TRA_Data	04/11/2018 (1)	11.546	59	108.8	99.9	0.918199	70	308000	4400	3.112	0.11	0.2471	0.0072	0.67394	4.04695	0.052	0.0906	0.0014	0.0716	0.0024	1435	28	1423	37	1438	17	1398	45	99.1638	98.9569
8	Oracle-2	8470c_TRA_Data	04/11/2018 (1)	15.008	76	387	194.3	0.502067	66	834000	12636.4	2.958	0.1	0.2355	0.0065	0.552	4.24629	0.043	0.09147	0.0012	0.0717	0.0022	1396.5	26	1363	34	1454.9	12	1399	42	97.6011	93.6834
9	Oracle-1	8472c_TRA_Data	04/11/2018 (1)	13.03	63	231	138.8	0.600866	91	600000	6593.41	3.137	0.046	0.2511	0.0056	0.56363	3.98248	0.043	0.09086	0.0014	0.0708	0.0024	1441.2	11	1444	29	1442	17	1382	45	100.194	100.139
10	Oracle-2	8473c_TRA_Data	04/11/2018 (1)	11.934	60	170.5	95.4	0.559531	2	475100	237550	3.191	0.047	0.2561	0.0059	0.65313	3.90473	0.043	0.09055	0.0013	0.0725	0.0025	1454.5	11	1470	30	1435	16	1414	47	101.066	102.439
11	Oracle-1	8477c_TRA_Data	04/11/2018 (1)	6.4324	33	179.4	172.1	0.959309	10	430000	43000	3.046	0.059	0.2496	0.0039	0.62618	4.00641	0.056	0.09	0.0013	0.0735	0.0026	1419	15	1436	20	1423	16	1434	50	101.198	100.914
12	Oracle-2	8478c_TRA_Data	04/11/2018 (1)	10.736	54	136.3	108.5	0.796038	32	353000	11031.2	3.166	0.045	0.2509	0.004	0.78259	3.98565	0.058	0.09049	0.00083	0.0689	0.0024	1448	11	1443	21	1436.6	8.7	1346	45	99.6547	100.445
13	Oracle-2	8480c_TRA_Data	04/11/2018 (1)	19.431	98	440	131.6	0.299091	38	1092000	28736.8	3.368	0.052	0.2537	0.0035	0.74044	3.94166	0.037	0.09762	0.0018	0.07775	0.0018	1496.5	12	1457	18	1577.9	20	1513	35	97.3605	92.3379
14	Oracle-1	8481c_TRA_Data	04/11/2018 (1)	8.8193	44	265.3	258.8	0.975499	21	653000	31095.2	3.209	0.072	0.2539	0.0047	0.69057	3.93856	0.055	0.091	0.0016	0.0682	0.0044	1459	17	1458	24	1444	15	1333	83	99.9315	100.97
15	Oracle-2	8482c_TRA_Data	04/11/2018 (1)	16.852	85	522	910	1.7433	91	1270000	13956	3.036	0.055	0.2473	0.0038	0.56616	4.04367	0.036	0.09156	0.0015	0.0622	0.0043	1416.2	14	1424	20	1457.8	15	1219	81	100.551	97.6814
16	Oracle-1	8483c_TRA_Data	04/11/2018 (1)	5.4216	28	431	149.3	0.346404	40	1051000	26275	3.171	0.084	0.253	0.0062	0.78357	3.95257	0.084	0.0907	0.0015	0.0678	0.0027	1449	20	1454	32	1440	19	1326	51	100.345	100.972
17	Oracle-2	8484c_TRA_Data	04/11/2018 (1)	8.9934	45	292	200.2	0.685616	57	698000	12245.6	3.176	0.065	0.2528	0.0045	0.56036	3.9557	0.049	0.0906	0.0014	0.0696	0.0026	1451	16	1452	23	1436	17	1360	50	100.069	101.114
18	Oracle-1	8485c_TRA_Data	04/11/2018 (1)	8.7612	44	591	116.9	0.1978	9	1291000	143444	3.127	0.1	0.2505	0.0099	0.59996	3.99202	0.054	0.0902	0.0013	0.0722	0.0027	1438.9	26	1441	51	1430.6	11	1410	51	100.146	100.727
	Tan Brown zircon (207Pb/206Pb= 2512.24 ± 0.71 (2s) Ma; Bauer et al., 2020)
1	Tan BrA-1	8582c_TRA_Data	16/11/2018 (6)	16.226	82	121.4	109.2	0.899506	10	840000	84000	11.12	0.42	0.4768	0.0083	0.69276	2.09732	0.025	0.1677	0.0032	0.1399	0.0024	2532.6	35	2512	36	2536	23	2645	43	99.1866	99.0536
2	Tan BrA-2	8583c_TRA_Data	16/11/2018 (6)	9.9433	50	266.1	127.7	0.479895	8	1746000	218250	10.95	0.44	0.475	0.012	0.53217	2.10526	0.046	0.166	0.0041	0.1573	0.0044	2518	37	2506	52	2525	25	2950	77	99.5234	99.2475
3	Tan BrA-1	8537c_TRA_Data	13/11/2018 (3)	5.7576	29	239.1	120.5	0.503973	75	1305000	17400	10.67	0.16	0.4663	0.0098	0.63462	2.14454	0.045	0.1669	0.0029	0.1456	0.0037	2494	14	2467	43	2526	15	2769	77	98.9174	97.6643
4	Tan BrA-2	8538c_TRA_Data	13/11/2018 (3)	28.807	145	186	116.2	0.624731	101	1133000	11217.8	10.587	0.089	0.4683	0.0042	0.77808	2.13538	0.02	0.16565	0.0013	0.1419	0.0017	2487.5	7.9	2475	18	2513.4	6.9	2681	29	99.4975	98.4722
5	Tan BrA-1	8540c_TRA_Data	13/11/2018 (3)	10.968	56	194.5	181.7	0.93419	142	1150000	8098.59	10.88	0.16	0.4726	0.012	0.45688	2.11595	0.028	0.1679	0.0029	0.1476	0.0034	2515	15	2494	54	2540	18	2782	59	99.165	98.189
6	Tan BrA-2	8542c_TRA_Data	13/11/2018 (3)	10.744	54	194.9	156.6	0.803489	3	1113000	371000	10.93	0.15	0.4763	0.012	0.58288	2.09952	0.031	0.1667	0.0027	0.1428	0.0031	2516	12	2510	54	2523	15	2697	55	99.7615	99.4847
7	Tan BrA-1	8543c_TRA_Data	13/11/2018 (3)	7.9425	39	236.3	191.8	0.81168	22	1314000	59727.3	10.66	0.25	0.4729	0.011	0.49097	2.11461	0.035	0.1639	0.0023	0.1442	0.0054	2493	22	2495	48	2501	16	2738	110	100.08	99.7601
8	Tan BrA-2	8544c_TRA_Data	13/11/2018 (3)	17.562	89	104	102.1	0.981731	101	593000	5871.29	10.95	0.23	0.4733	0.0099	0.63272	2.11282	0.027	0.1679	0.0018	0.135	0.0045	2517.8	19	2497	43	2536.7	9.8	2559	80	99.1739	98.435
9	Tan BrA-1	8545c_TRA_Data	13/11/2018 (3)	21.484	109	222.2	233.8	1.05221	79	1289000	16316.5	10.931	0.27	0.4782	0.0085	0.70717	2.09117	0.018	0.1654	0.0015	0.1268	0.0041	2516.5	23	2519	37	2513.6	9.9	2412	73	100.099	100.215
10	Tan BrA-2	8545c_TRA_Data	13/11/2018 (3)	10.615	51	228.7	213.8	0.934849	37	1244000	33621.6	10.96	0.3	0.4747	0.011	0.77857	2.10659	0.035	0.1675	0.0026	0.1371	0.0052	2519	26	2503	47	2529	14	2596	92	99.3648	98.9719
11	Tan BrA-1	8547c_TRA_Data	13/11/2018 (3)	23.723	119	225	212	0.942222	16	1196000	74750	10.95	0.24	0.4805	0.0078	0.74946	2.08116	0.019	0.16561	0.00086	0.1284	0.0018	2518.1	20	2528	34	2510.7	5.4	2446	33	100.393	100.689
12	Tan BrA-1	8549c_TRA_Data	13/11/2018 (3)	7.8668	40	335	254	0.758209	26	1676000	64461.5	11.19	0.42	0.489	0.016	0.83803	2.04499	0.044	0.1655	0.0031	0.1301	0.0033	2537	36	2567	69	2514	19	2471	60	101.182	102.108
13	Tan BrA-1	8553c_TRA_Data	13/11/2018 (3)	2.9109	15	212.7	199.5	0.937941	10	1168000	116800	10.36	0.23	0.4658	0.0095	0.62242	2.14684	0.036	0.1621	0.0043	0.1204	0.028	2467	21	2465	42	2477	28	2297	510	99.9189	99.5155
14	Tan BrA-2	8556c_TRA_Data	13/11/2018 (3)	29.588	148	325	213.4	0.656615	27	1557000	57666.7	10.28	0.42	0.4751	0.017	0.59344	2.10482	0.017	0.1661	0.002	0.1377	0.0024	2459.6	37	2505	74	2519.8	11	2607	43	101.846	99.4127
15	Tan BrA-1	8557c_TRA_Data	13/11/2018 (3)	16.112	81	371	263.2	0.709434	19	1796000	94526.3	10.95	0.28	0.4796	0.011	0.75127	2.08507	0.019	0.165	0.0022	0.1292	0.0024	2518.5	24	2525	49	2505.7	12	2456	42	100.258	100.77
16	Tan BrA-2	8558c_TRA_Data	13/11/2018 (3)	8.7994	43	440	279	0.634091	14	1938000	138429	10.74	0.31	0.4672	0.013	0.42128	2.14041	0.04	0.1665	0.0037	0.1493	0.0039	2500	27	2470	58	2520	20	2811	68	98.8	98.0159
17	Tan BrA-1	8559c_TRA_Data	13/11/2018 (3)	21.599	109	287	151.3	0.527178	1	1367000	1367000	10.86	0.2	0.4757	0.01	0.93791	2.10216	0.03	0.16536	0.002	0.1264	0.005	2509	17	2507	46	2511.3	12	2405	90	99.9203	99.8288
18	Tan BrA-2	8562c_TRA_Data	14/11/2018 (4)	19.737	99	261.2	157	0.601072	3	1163000	387667	10.473	0.24	0.47	0.0075	0.55807	2.12766	0.021	0.1655	0.0037	0.1469	0.0036	2478.1	22	2483	33	2513.1	25	2770	63	100.198	98.8023
19	Tan BrA-1	8563c_TRA_Data	14/11/2018 (4)	20.271	102	362	320.3	0.884807	19	1686000	88736.8	11.106	0.23	0.4848	0.01	0.62204	2.06271	0.017	0.1662	0.0015	0.129	0.0017	2531.6	20	2548	43	2518.8	9.5	2452	30	100.648	101.159
20	Tan BrA-2	8564c_TRA_Data	14/11/2018 (4)	9.4837	48	486.6	338.9	0.696465	47	2020000	42978.7	10.17	0.23	0.4501	0.011	0.34137	2.22173	0.03	0.1649	0.0026	0.1361	0.003	2449.8	21	2395	47	2502	14	2578	53	97.7631	95.7234
21	Tan BrA-1	8565c_TRA_Data	14/11/2018 (4)	22.56	111	267.8	317.1	1.18409	173	1276000	7375.72	11.115	0.21	0.4822	0.0081	0.74123	2.07383	0.019	0.167	0.0021	0.1312	0.0039	2532.1	17	2536	35	2528.3	11	2492	69	100.154	100.305
22	Tan BrA-2	8566c_TRA_Data	14/11/2018 (4)	5.732	29	464.8	499	1.07358	740	1953000	2639.19	10.99	0.28	0.479	0.012	0.55567	2.08768	0.042	0.1671	0.0035	0.1572	0.0062	2521	23	2522	51	2530	20	2950	55	100.04	99.6838
23	Tan BrA-2	8507c_TRA_Data	06/11/2018 (3)	23.022	114	227.1	139.8	0.615588	143	1407000	9839.16	10.573	0.13	0.4663	0.0052	0.62404	2.14454	0.019	0.1663	0.0022	0.1381	0.0019	2486.6	12	2467	23	2522	15	2613	34	99.2118	97.8192
24	Tan BrA-1	8567c_TRA_Data	14/11/2018 (4)	20.642	104	246.4	268	1.08766	73	1212000	16602.7	10.862	0.25	0.4748	0.013	0.61079	2.10615	0.017	0.1656	0.0011	0.1315	0.0022	2510.9	21	2504	56	2516.3	5.4	2496	39	99.7252	99.5112
25	Tan BrA-1	8572c_TRA_Data	16/11/2018 (6)	23.304	117	265.5	234.3	0.882486	62	2097000	33822.6	10.931	0.19	0.479	0.011	0.62991	2.08768	0.016	0.1661	0.0017	0.1357	0.0032	2517.6	17	2522	50	2517	8.2	2571	57	100.175	100.199
26	Tan BrA-2	8573c_TRA_Data	16/11/2018 (6)	10.705	54	246.3	182.9	0.74259	100	2098000	20980	10.91	0.21	0.4752	0.012	0.73052	2.10438	0.025	0.166	0.002	0.1552	0.0042	2514.5	18	2506	53	2519.6	12	2915	73	99.662	99.4602
27	Tan BrA-1	8574c_TRA_Data	16/11/2018 (6)	19.754	99	196	224.7	1.14643	78	1530000	19615.4	10.961	0.2	0.4792	0.0092	0.68026	2.08681	0.02	0.1649	0.0021	0.1351	0.002	2519.1	17	2523	40	2506.9	12	2560	36	100.155	100.642
28	Tan BrA-2	8575c_TRA_Data	16/11/2018 (6)	7.5113	37	340.3	290.7	0.854246	60	2405000	40083.3	11.01	0.23	0.4747	0.011	0.73623	2.10659	0.032	0.1676	0.003	0.1427	0.0038	2523	20	2503	47	2533	14	2695	67	99.2073	98.8156
29	Tan BrA-1	8577c_TRA_Data	16/11/2018 (6)	12.395	62	209.7	142.3	0.678588	29	1908000	65793.1	11.08	0.12	0.4844	0.0078	0.71094	2.06441	0.023	0.1664	0.0016	0.1298	0.0051	2529.4	10	2546	34	2521.4	9.9	2466	91	100.656	100.976
30	Tan BrA-2	8577c_TRA_Data	16/11/2018 (6)	8.2886	42	279.5	212.4	0.759928	11	1876000	170545	10.77	0.18	0.467	0.0089	0.59921	2.14133	0.034	0.1673	0.0025	0.1401	0.0059	2502	15	2470	39	2529	11	2650	50	98.721	97.6671
31	Tan BrA-1	8512c_TRA_Data	06/11/2018 (3)	6.6901	34	229.1	206.9	0.903099	10	1107000	110700	10.66	0.34	0.4709	0.014	0.37797	2.12359	0.043	0.1661	0.0033	0.1569	0.006	2493	29	2487	59	2511	19	2940	55	99.7593	99.0442
32	Tan BrA-1	8578c_TRA_Data	16/11/2018 (6)	21.62	109	303.7	216.7	0.713533	1	2194000	2194000	11.02	1.2	0.4811	0.013	0.54953	2.07857	0.016	0.1661	0.015	0.1343	0.022	2524.4	55	2532	57	2517.8	93	2547	35	100.301	100.564
33	Tan BrA-2	8579c_TRA_Data	16/11/2018 (6)	13.773	70	249.3	198.4	0.795828	5	2000000	400000	10.97	1.2	0.4775	0.014	0.69211	2.09424	0.023	0.1664	0.015	0.1563	0.025	2520	55	2516	59	2520.5	91	2935	44	99.8413	99.8215
34	Tan BrA-2	8515c_TRA_Data	06/11/2018 (3)	21.912	109	453	262.4	0.579249	9	2004000	222667	11.104	0.19	0.4823	0.0067	0.71508	2.0734	0.018	0.1681	0.0031	0.1336	0.0032	2531.3	16	2537	29	2538.8	16	2534	56	100.225	99.9291
35	Tan BrA-1	8580c_TRA_Data	16/11/2018 (6)	28.127	142	300	178.9	0.596333	45	2193000	48733.3	10.852	0.09	0.4746	0.003	0.64999	2.10704	0.013	0.16614	0.0013	0.1323	0.0036	2510.1	7.7	2503	13	2518.7	7.5	2511	64	99.7171	99.3767
36	Tan BrA-2	8581c_TRA_Data	16/11/2018 (6)	8.7655	45	362.1	166.5	0.459818	58	2233000	38500	10.9	0.18	0.461	0.0059	0.38931	2.1692	0.028	0.1728	0.0027	0.1454	0.0058	2514	16	2444	26	2577	17	2742	50	97.2156	94.839
37	Tan BrA-2	8517c_TRA_Data	06/11/2018 (3)	14.26	71	361	232.3	0.64349	26	1324000	50923.1	10.96	0.29	0.4732	0.011	0.53252	2.11327	0.027	0.1671	0.002	0.1454	0.0027	2519	25	2497	47	2526	11	2742	48	99.1266	98.8519
38	Tan BrA-1	8520c_TRA_Data	06/11/2018 (3)	8.3809	42	401	277.1	0.691022	47	1470000	31276.6	10.89	0.25	0.4776	0.0095	0.43743	2.0938	0.04	0.1655	0.0036	0.1476	0.0064	2512	21	2516	42	2512	19	2782	55	100.159	100.159
39	Tan BrA-2	8521c_TRA_Data	06/11/2018 (3)	5.6403	28	431	278.6	0.646404	50	1514000	30280	10.91	0.2	0.462	0.011	0.42748	2.1645	0.047	0.1674	0.0039	0.1443	0.0061	2515	17	2447	47	2531	25	2723	55	97.2962	96.6812
40	Tan BrA-1	8524c_TRA_Data	06/11/2018 (3)	10.23	51	317.2	310.7	0.979508	13	1159000	89153.8	10.46	0.31	0.4561	0.014	0.63202	2.1925	0.036	0.1673	0.0031	0.1455	0.0069	2475	28	2421	61	2530	22	2746	60	97.8182	95.6917
41	Tan BrA-2	8524c_TRA_Data	06/11/2018 (3)	6.9408	35	390	310.6	0.79641	9	1384000	153778	10.68	0.33	0.468	0.016	0.57301	2.13675	0.049	0.1651	0.0038	0.1468	0.0074	2495	29	2473	70	2509	27	2768	30	99.1182	98.5652
	91500 zircon (207Pb/206Pb= 1065.4 ± 0.6 (2s); Wiedenbeck et al., 1995)
1	91500-1	8462c_TRA_Data	04/11/2018 (1)	28.118	141	79.8	29.98	0.375689	80	155000	1937.5	1.86	0.047	0.1793	0.005	0.61171	5.57724	0.054	0.07552	0.00095	0.05266	0.0013	1065.8	17	1062.7	28	1081	13	1037	24	99.7091	98.3071
2	91500-2	8462c_TRA_Data	04/11/2018 (1)	28.112	142	81	30.28	0.373827	39	159700	4094.87	1.831	0.047	0.1774	0.005	0.6336	5.63698	0.059	0.07487	0.00097	0.0532	0.0013	1055.3	17	1052.6	27	1063	15	1048	26	99.7441	99.0216
3	91500-3	8462c_TRA_Data	04/11/2018 (1)	28.104	142	79.3	29.72	0.374779	17	160700	9452.94	1.844	0.047	0.1808	0.0052	0.66004	5.53097	0.064	0.07396	0.00091	0.05476	0.0013	1061.2	16	1071	28	1044	13	1077	24	100.923	102.586
4	91500-4	8462c_TRA_Data	04/11/2018 (1)	28.115	142	80.1	30.17	0.376654	29	164600	5675.86	1.863	0.046	0.1808	0.005	0.62829	5.53097	0.05	0.07486	0.00089	0.0537	0.0014	1068.4	16	1070.9	27	1067.2	13	1057	26	100.234	100.347
5	91500-5	8462c_TRA_Data	04/11/2018 (1)	28.117	142	80.2	29.97	0.373691	50	167600	3352	1.845	0.046	0.1779	0.005	0.53098	5.62113	0.051	0.07509	0.00093	0.0544	0.0014	1060.5	16	1055.5	27	1072	14	1070	27	99.5285	98.4608
6	91500-6	8462c_TRA_Data	04/11/2018 (1)	28.114	141	80	30.01	0.375125	3	159200	53066.7	1.839	0.047	0.1787	0.005	0.61894	5.59597	0.052	0.07487	0.00093	0.0536	0.0013	1058.2	17	1059.8	27	1063	15	1055	25	100.151	99.699
7	91500-7	8462c_TRA_Data	04/11/2018 (1)	28.128	142	79.7	29.95	0.375784	12	151300	12608.3	1.862	0.047	0.1796	0.005	0.64093	5.56793	0.055	0.07537	0.00092	0.05347	0.0012	1066.7	17	1064.5	28	1076	14	1053	23	99.7938	98.9312
8	91500-9	8463c_TRA_Data	04/11/2018 (1)	28.114	142	80	30	0.375	54	157200	2911.11	1.853	0.046	0.1797	0.0051	0.6171	5.56483	0.059	0.07459	0.0009	0.05461	0.0012	1064.6	17	1065	28	1056	14	1075	24	100.038	100.852
9	91500-8	8463c_TRA_Data	04/11/2018 (1)	28.119	141	79.9	30	0.375469	20	153600	7680	1.844	0.046	0.1786	0.005	0.55847	5.5991	0.059	0.07462	0.00097	0.05371	0.0012	1060.2	16	1059	28	1056	14	1057	23	99.8868	100.284
10	91500-10	8463c_TRA_Data	04/11/2018 (1)	28.161	142	80.1	29.96	0.374032	27	146700	5433.33	1.866	0.048	0.1803	0.0051	0.58345	5.54631	0.054	0.07516	0.00095	0.05384	0.0012	1067.8	17	1068.6	28	1065	14	1060	24	100.075	100.338
11	91500-11	8463c_TRA_Data	04/11/2018 (1)	28.114	141	80.3	30.17	0.375716	23	162400	7060.87	1.833	0.048	0.1772	0.005	0.70418	5.64334	0.053	0.07513	0.00091	0.05348	0.0012	1056	17	1052.6	27	1071	14	1053	23	99.678	98.282
12	91500-12	8463c_TRA_Data	04/11/2018 (1)	17.32	88	80.1	29.97	0.374157	30	177900	5930	1.851	0.048	0.1803	0.0052	0.56385	5.54631	0.062	0.07443	0.001	0.0532	0.0014	1063	17	1068	28	1052	16	1048	27	100.47	101.521
13	91500-1	8464c_TRA_Data	04/11/2018 (1)	28.163	142	78	28.86	0.37	17	149500	8794.12	1.826	0.042	0.1775	0.0027	0.7272	5.6338	0.067	0.07514	0.00092	0.0533	0.0014	1053.4	15	1053	15	1071	14	1053	27	99.962	98.3193
14	91500-2	8464c_TRA_Data	04/11/2018 (1)	28.136	141	81.1	30.63	0.377682	7	157300	22471.4	1.855	0.041	0.1792	0.0025	0.63963	5.58036	0.059	0.07517	0.00093	0.0539	0.0014	1064.1	15	1062	13	1074	16	1061	28	99.8027	98.8827
15	91500-3	8464c_TRA_Data	04/11/2018 (1)	28.215	143	78.8	29.78	0.377919	46	153400	3334.78	1.857	0.042	0.1801	0.0026	0.67844	5.55247	0.062	0.07513	0.00095	0.0539	0.0014	1064.7	15	1067	14	1074	15	1061	26	100.216	99.3482
16	91500-4	8464c_TRA_Data	04/11/2018 (1)	28.184	142	79.5	29.82	0.375094	26	153000	5884.62	1.825	0.041	0.1785	0.0025	0.60006	5.60224	0.06	0.07428	0.00097	0.05355	0.0013	1053.4	15	1060	14	1051	15	1054	26	100.627	100.856
17	91500-5	8464c_TRA_Data	04/11/2018 (1)	28.18	143	79.4	30.23	0.38073	47	154800	3293.62	1.858	0.041	0.1806	0.0025	0.62146	5.5371	0.058	0.07483	0.00094	0.05461	0.0014	1066.3	15	1070	14	1062	14	1074	26	100.347	100.753
18	91500-6	8464c_TRA_Data	04/11/2018 (1)	28.157	142	83.6	30.69	0.367105	50	158100	3162	1.842	0.042	0.1777	0.0025	0.68676	5.62746	0.058	0.07443	0.00092	0.05274	0.0013	1059.3	15	1054	14	1054	17	1039	25	99.4997	100
19	91500-7	8464c_TRA_Data	04/11/2018 (1)	28.138	142	80.9	30.11	0.372188	33	154500	4681.82	1.882	0.042	0.18	0.0023	0.55902	5.55556	0.051	0.07505	0.00097	0.05361	0.0013	1073.5	15	1066.7	13	1069	15	1055	25	99.3666	99.7848
20	91500-8	8465c_TRA_Data	04/11/2018 (1)	28.271	143	78.7	29.49	0.374714	28	147600	5271.43	1.861	0.041	0.1798	0.0025	0.59197	5.56173	0.057	0.07441	0.00094	0.05349	0.0014	1067.3	15	1066	13	1054	15	1053	26	99.8782	101.139
21	91500-9	8465c_TRA_Data	04/11/2018 (1)	28.199	142	81.9	31.15	0.380342	6	152600	25433.3	1.867	0.042	0.179	0.0024	0.62852	5.58659	0.057	0.0752	0.00095	0.05469	0.0013	1068.3	15	1061.5	13	1073.7	12	1076	25	99.3635	98.8637
22	91500-10	8465c_TRA_Data	04/11/2018 (1)	28.236	142	77	28.43	0.369221	19	138300	7278.95	1.828	0.043	0.1781	0.0025	0.74867	5.61482	0.062	0.07478	0.00091	0.0534	0.0014	1054.1	15	1056	14	1062	13	1051	27	100.18	99.435
23	91500-11	8465c_TRA_Data	04/11/2018 (1)	28.129	140	80.5	30.61	0.380248	61	145700	2388.52	1.853	0.04	0.1794	0.0024	0.57364	5.57414	0.059	0.0754	0.00098	0.05369	0.0014	1064.3	15	1064	13	1078	14	1057	26	99.9718	98.7013
24	91500-12	8465c_TRA_Data	04/11/2018 (1)	28.208	142	81.1	30.6	0.377312	43	145700	3388.37	1.837	0.04	0.1795	0.0025	0.57961	5.57103	0.058	0.07477	0.00093	0.0539	0.0014	1057.9	14	1064	14	1066	15	1061	28	100.577	99.8124
25	91500-1	8467c_TRA_Data	04/11/2018 (1)	19.757	100	80	30.05	0.375625	5	161400	32280	1.849	0.046	0.1788	0.0041	0.6464	5.59284	0.063	0.07497	0.00081	0.0533	0.0011	1062	17	1060	22	1069	10	1050	22	99.8117	99.1581
26	91500-2	8467c_TRA_Data	04/11/2018 (1)	21.182	107	79	29.56	0.374177	30	159100	5303.33	1.873	0.048	0.1797	0.004	0.41462	5.56483	0.059	0.0747	0.001	0.0542	0.0011	1070.5	17	1065	22	1057	15	1067	20	99.4862	100.757
27	91500-3	8467c_TRA_Data	04/11/2018 (1)	20.783	105	83.6	31.45	0.376196	9	161200	17911.1	1.864	0.045	0.1791	0.0041	0.6464	5.58347	0.064	0.0749	0.00076	0.0538	0.0012	1067.4	16	1062	22	1064	13	1058	22	99.4941	99.812
28	91500-5	8467c_TRA_Data	04/11/2018 (1)	20.749	105	84.8	31.6	0.372642	27	156000	5777.78	1.81	0.045	0.1791	0.0041	0.6395	5.58347	0.066	0.0749	0.0008	0.0536	0.0011	1048	16	1062	22	1066	11	1055	21	101.336	99.6248
29	91500-6	8467c_TRA_Data	04/11/2018 (1)	20.007	101	79.7	29.88	0.374906	45	159200	3537.78	1.847	0.047	0.1792	0.0042	0.64378	5.58036	0.068	0.07493	0.00092	0.0541	0.0011	1061.3	17	1062	23	1064	15	1066	21	100.066	99.812
30	91500-7	8467c_TRA_Data	04/11/2018 (1)	20.764	105	80.1	30.05	0.375156	26	158600	6100	1.846	0.046	0.1791	0.004	0.55798	5.58347	0.06	0.07483	0.00087	0.05345	0.00098	1061	16	1062	22	1064	13	1052	19	100.094	99.812
31	91500-9	8468c_TRA_Data	04/11/2018 (1)	20.252	101	80	30.01	0.375125	4	146000	36500	1.877	0.05	0.1792	0.0041	0.70677	5.58036	0.068	0.07487	0.00087	0.0537	0.0011	1072	18	1063	23	1067	14	1058	21	99.1604	99.6251
32	91500-8	8468c_TRA_Data	04/11/2018 (1)	20.763	103	80.1	30.02	0.374782	41	153000	3731.71	1.857	0.045	0.1791	0.0041	0.61759	5.58347	0.064	0.07488	0.00083	0.0536	0.0012	1065.1	16	1062	23	1064	12	1055	24	99.7089	99.812
33	91500-10	8468c_TRA_Data	04/11/2018 (1)	20.505	102	80	30.07	0.375875	4	158300	39575	1.859	0.046	0.1793	0.0041	0.49399	5.57724	0.063	0.07475	0.00094	0.0539	0.0012	1065.6	16	1063	22	1057	14	1060	22	99.756	100.568
34	91500-11	8468c_TRA_Data	04/11/2018 (1)	20.378	102	79.9	29.96	0.374969	29	147300	5079.31	1.844	0.046	0.1789	0.0041	0.64562	5.58971	0.065	0.07512	0.00083	0.0544	0.0011	1060.3	16	1061	22	1070	13	1071	20	100.066	99.1589
35	91500-12	8468c_TRA_Data	04/11/2018 (1)	20.765	104	80	30	0.375	23	144300	6273.91	1.833	0.046	0.1793	0.0041	0.67483	5.57724	0.066	0.07477	0.00079	0.053	0.0011	1056.3	16	1063	23	1062	12	1044	21	100.634	100.094
36	91500-2	8469c_TRA_Data	04/11/2018 (1)	20.492	103	79.9	30.41	0.380601	16	155500	9718.75	1.862	0.067	0.1818	0.0053	0.65004	5.50055	0.071	0.07435	0.0011	0.0526	0.0018	1066.7	24	1077	29	1050	17	1035	35	100.966	102.571
37	91500-3	8469c_TRA_Data	04/11/2018 (1)	20.879	105	79.5	29.59	0.372201	9	151600	16844.4	1.844	0.065	0.1783	0.005	0.57985	5.60853	0.06	0.07495	0.0011	0.0532	0.0019	1060.5	23	1057	27	1065	17	1046	36	99.67	99.2488
38	91500-4	8469c_TRA_Data	04/11/2018 (1)	20.648	104	81.2	29.73	0.366133	1	154100	154100	1.836	0.066	0.178	0.0051	0.58637	5.61798	0.07	0.07477	0.0011	0.0548	0.0018	1057.5	24	1056	28	1063	21	1078	35	99.8582	99.3415
39	91500-5	8469c_TRA_Data	04/11/2018 (1)	20.964	105	79.7	30.3	0.380176	16	152600	9537.5	1.846	0.066	0.1793	0.005	0.60082	5.57724	0.063	0.07472	0.0011	0.0534	0.0019	1061	24	1063	28	1059	18	1052	36	100.189	100.378
40	91500-6	8469c_TRA_Data	04/11/2018 (1)	20.546	103	79.3	29.57	0.372888	29	148700	5127.59	1.849	0.067	0.1783	0.0051	0.62379	5.60853	0.074	0.07527	0.0012	0.0555	0.002	1062	24	1058	28	1073	17	1092	38	99.6234	98.6021
41	91500-7	8469c_TRA_Data	04/11/2018 (1)	20.435	103	80.5	30.35	0.377019	21	151500	7214.29	1.868	0.068	0.1785	0.0051	0.59726	5.60224	0.072	0.07596	0.0012	0.0535	0.0019	1068.7	24	1059	28	1093	19	1053	36	99.0924	96.8893
42	91500-9	8470c_TRA_Data	04/11/2018 (1)	20.23	102	79.7	29.77	0.373526	13	145000	11153.8	1.848	0.066	0.1796	0.005	0.6283	5.56793	0.064	0.07466	0.0011	0.0539	0.0018	1063.1	23	1064	28	1058	16	1060	35	100.085	100.567
43	91500-8	8470c_TRA_Data	04/11/2018 (1)	20.448	103	80.6	30.29	0.375806	28	146800	5242.86	1.864	0.066	0.1807	0.0051	0.53345	5.53403	0.067	0.07488	0.0012	0.0539	0.0019	1067.6	24	1071	28	1064	17	1061	36	100.318	100.658
44	91500-10	8470c_TRA_Data	04/11/2018 (1)	20.129	101	79.3	29.82	0.37604	27	138900	5144.44	1.818	0.067	0.1769	0.0051	0.65323	5.65291	0.071	0.07442	0.0012	0.0537	0.0018	1051	24	1050	28	1051	18	1056	34	99.9049	99.9049
45	91500-11	8470c_TRA_Data	04/11/2018 (1)	19.9	100	78.2	29.73	0.380179	26	143800	5530.77	1.908	0.068	0.1834	0.0051	0.5859	5.45256	0.06	0.07513	0.0011	0.0534	0.0018	1083	24	1085	28	1068	18	1055	37	100.185	101.592
46	91500-12	8470c_TRA_Data	04/11/2018 (1)	18.805	95	82.4	30.46	0.36966	11	149800	13618.2	1.81	0.064	0.1758	0.005	0.59406	5.68828	0.069	0.07474	0.0011	0.0535	0.0018	1048.2	23	1044	27	1059	17	1053	35	99.5993	98.5836
47	91500-1	8472c_TRA_Data	04/11/2018 (1)	20.861	105	82	31.64	0.385854	17	155900	9170.59	1.849	0.031	0.1802	0.0043	0.70613	5.54939	0.071	0.07517	0.0011	0.05272	0.0019	1061.9	11	1068	24	1073	17	1038	36	100.574	99.534
48	91500-2	8472c_TRA_Data	04/11/2018 (1)	20.449	103	78	29.7	0.380769	61	148600	2436.07	1.86	0.031	0.1805	0.0043	0.63498	5.54017	0.068	0.07509	0.0012	0.0543	0.002	1067.2	11	1070	23	1069	18	1068	38	100.262	100.094
49	91500-3	8472c_TRA_Data	04/11/2018 (1)	20.662	104	77.8	29.29	0.376478	13	147000	11307.7	1.843	0.03	0.1789	0.0041	0.57072	5.58971	0.062	0.07468	0.0012	0.0532	0.002	1062.8	11	1061	22	1058	18	1047	38	99.8306	100.284
50	91500-4	8472c_TRA_Data	04/11/2018 (1)	20.447	103	81.9	30.05	0.366911	55	154000	2800	1.838	0.032	0.1784	0.0044	0.7322	5.60538	0.079	0.07434	0.0011	0.0536	0.0019	1057.9	11	1058	24	1052	18	1055	36	100.009	100.57
51	91500-5	8472c_TRA_Data	04/11/2018 (1)	20.458	103	81	29.71	0.36679	6	153100	25516.7	1.858	0.03	0.1793	0.0043	0.58993	5.57724	0.074	0.07456	0.0012	0.0552	0.002	1065.3	10	1063	23	1057	18	1086	39	99.7841	100.568
52	91500-6	8472c_TRA_Data	04/11/2018 (1)	20.247	102	79.7	29.29	0.367503	9	147800	16422.2	1.851	0.032	0.178	0.0042	0.57982	5.61798	0.065	0.07557	0.0013	0.054	0.0019	1062.5	11	1056	23	1083	21	1063	37	99.3882	97.5069
53	91500-7	8472c_TRA_Data	04/11/2018 (1)	20.439	103	83.4	31.66	0.379616	50	155800	3116	1.849	0.034	0.1795	0.0043	0.51929	5.57103	0.071	0.0748	0.0013	0.05368	0.0019	1062	12	1064	23	1060	21	1057	36	100.188	100.377
54	91500-8	8473c_TRA_Data	04/11/2018 (1)	20.268	101	77.8	28.05	0.36054	11	140900	12809.1	1.847	0.03	0.1763	0.004	0.57108	5.67215	0.063	0.07561	0.0012	0.0539	0.0021	1061.3	10	1047	22	1083	19	1061	40	98.6526	96.6759
55	91500-9	8473c_TRA_Data	04/11/2018 (1)	20.248	102	80.6	30.05	0.372829	56	149900	2676.79	1.854	0.033	0.1804	0.0042	0.6568	5.54324	0.062	0.07462	0.0012	0.054	0.0021	1063.7	12	1069	23	1056	20	1062	41	100.498	101.231
56	91500-10	8473c_TRA_Data	04/11/2018 (1)	20.66	104	80.9	31.1	0.384425	32	153300	4790.62	1.853	0.032	0.1817	0.0041	0.56011	5.50358	0.059	0.07417	0.0012	0.0541	0.0021	1063.3	11	1076	23	1045	18	1064	40	101.194	102.967
57	91500-11	8473c_TRA_Data	04/11/2018 (1)	20.244	102	81.2	30.73	0.378448	35	150900	4311.43	1.845	0.032	0.1785	0.0044	0.74954	5.60224	0.083	0.07509	0.0011	0.0533	0.002	1060.6	11	1058	24	1070	20	1049	38	99.7549	98.8785
58	91500-12	8473c_TRA_Data	04/11/2018 (1)	20.65	104	79.7	30.37	0.381054	42	149100	3550	1.851	0.031	0.1787	0.0042	0.45797	5.59597	0.067	0.0748	0.0013	0.0536	0.0019	1062.8	11	1059	23	1063	20	1054	37	99.6425	99.6237
59	91500-1	8474c_TRA_Data	04/11/2018 (1)	20.163	101	82.1	30.25	0.368453	32	155300	4853.12	1.848	0.029	0.1772	0.003	0.62552	5.64334	0.066	0.07548	0.00083	0.0538	0.0021	1061.5	10	1052	16	1085	12	1059	39	99.105	96.9585
60	91500-2	8474c_TRA_Data	04/11/2018 (1)	20.155	102	79.5	29.67	0.373208	26	151400	5823.08	1.845	0.028	0.1786	0.003	0.57824	5.5991	0.068	0.07495	0.00091	0.0527	0.002	1060.6	10	1059	17	1067	12	1038	39	99.8491	99.2502
61	91500-3	8474c_TRA_Data	04/11/2018 (1)	19.794	100	78.5	29.94	0.381401	68	150700	2216.18	1.854	0.031	0.1802	0.0032	0.589	5.54939	0.073	0.07448	0.00094	0.055	0.0022	1063	11	1068	17	1059	15	1081	42	100.47	100.85
62	91500-4	8474c_TRA_Data	04/11/2018 (1)	20.377	102	78.7	30.02	0.381449	60	151700	2528.33	1.862	0.03	0.1809	0.0031	0.57506	5.52792	0.066	0.07453	0.00087	0.0533	0.002	1066.5	11	1072	17	1057	15	1049	39	100.516	101.419
63	91500-5	8474c_TRA_Data	04/11/2018 (1)	18.687	95	80.1	30.08	0.375531	28	152100	5432.14	1.845	0.031	0.179	0.0031	0.65444	5.58659	0.069	0.07505	0.00091	0.0544	0.0021	1062	11	1061	17	1068	14	1071	40	99.9058	99.3446
64	91500-6	8474c_TRA_Data	04/11/2018 (1)	20.053	101	79.4	29.82	0.375567	31	151900	4900	1.863	0.033	0.1811	0.0034	0.66223	5.52181	0.076	0.0747	0.00093	0.0535	0.002	1068	11	1073	19	1060	15	1054	39	100.468	101.226
65	91500-7	8474c_TRA_Data	04/11/2018 (1)	20.475	103	81	30.22	0.373086	1	153600	153600	1.84	0.029	0.1786	0.003	0.55348	5.5991	0.067	0.0747	0.001	0.053	0.0021	1058.6	10	1061	17	1057	15	1044	41	100.227	100.378
66	91500-8	8475c_TRA_Data	04/11/2018 (1)	20.381	103	83	30.04	0.361928	8	154400	19300	1.834	0.028	0.1774	0.0031	0.59856	5.63698	0.073	0.07504	0.00091	0.0549	0.0021	1058	9.8	1053	17	1069	14	1080	40	99.5274	98.5033
67	91500-9	8475c_TRA_Data	04/11/2018 (1)	20.171	102	80	29.93	0.374125	6	151300	25216.7	1.855	0.03	0.1804	0.0031	0.60884	5.54324	0.068	0.07462	0.00091	0.05376	0.002	1064	11	1069	17	1058	15	1058	38	100.47	101.04
68	91500-10	8475c_TRA_Data	04/11/2018 (1)	20.477	103	79.7	30.36	0.380928	14	150400	10742.9	1.873	0.031	0.181	0.0032	0.54206	5.52486	0.073	0.075	0.001	0.0545	0.0021	1070	11	1072	18	1065	14	1072	40	100.187	100.657
69	91500-11	8475c_TRA_Data	04/11/2018 (1)	20.266	102	78.9	29.62	0.375412	47	146700	3121.28	1.846	0.027	0.1789	0.0029	0.45862	5.58971	0.063	0.07498	0.00096	0.053	0.0021	1060.9	9.6	1061	16	1067	14	1043	39	100.009	99.4377
70	91500-12	8475c_TRA_Data	04/11/2018 (1)	20.47	103	80.5	30.19	0.375031	36	149300	4147.22	1.843	0.031	0.1778	0.0031	0.63135	5.6243	0.071	0.07491	0.00091	0.0533	0.002	1060	11	1055	17	1066	13	1050	39	99.5283	98.9681
71	91500-1	8477c_TRA_Data	04/11/2018 (1)	28.115	141	81.5	30.21	0.370675	5	154800	30960	1.843	0.024	0.1793	0.0022	0.55902	5.57724	0.056	0.07465	0.00082	0.0539	0.002	1059.8	8.6	1062.6	12	1057	13	1062	38	100.264	100.53
72	91500-2	8477c_TRA_Data	04/11/2018 (1)	28.118	142	77.9	29.17	0.374454	3	147900	49300	1.854	0.027	0.1794	0.0022	0.63815	5.57414	0.058	0.07471	0.00079	0.0537	0.002	1063.2	9.6	1063.4	12	1062	13	1057	38	100.019	100.132
73	91500-3	8477c_TRA_Data	04/11/2018 (1)	28.112	142	85	31.62	0.372	16	159700	9981.25	1.855	0.025	0.1791	0.0022	0.52156	5.58347	0.059	0.07515	0.00085	0.0547	0.002	1063.9	8.8	1062	12	1072	13	1075	38	99.8214	99.0672
74	91500-4	8477c_TRA_Data	04/11/2018 (1)	28.11	141	78.4	29.55	0.376913	34	146500	4308.82	1.841	0.024	0.1785	0.0025	0.68931	5.60224	0.068	0.07488	0.00072	0.0529	0.002	1060.2	8.4	1060	14	1066	11	1041	38	99.9811	99.4371
75	91500-5	8477c_TRA_Data	04/11/2018 (1)	28.126	142	77.7	29.58	0.380695	80	145700	1821.25	1.858	0.025	0.1797	0.0024	0.55622	5.56483	0.064	0.07502	0.00088	0.0534	0.002	1064.9	8.8	1065	13	1067	14	1050	38	100.009	99.8126
76	91500-6	8477c_TRA_Data	04/11/2018 (1)	28.11	142	82.4	30.53	0.37051	43	148000	3441.86	1.84	0.023	0.1778	0.0024	0.63363	5.6243	0.066	0.07501	0.00075	0.05365	0.0019	1058.7	8.1	1054	13	1067	12	1056	36	99.5561	98.7816
77	91500-7	8477c_TRA_Data	04/11/2018 (1)	28.108	142	78.8	29.54	0.374873	67	142100	2120.9	1.858	0.02	0.1793	0.0021	0.47572	5.57724	0.053	0.07489	0.00081	0.0537	0.0019	1065.2	7.2	1062.9	11	1062	11	1057	37	99.7841	100.085
78	91500-9	8478c_TRA_Data	04/11/2018 (1)	28.123	142	80.2	30.18	0.376309	1	138100	138100	1.848	0.021	0.1785	0.0021	0.54384	5.60224	0.051	0.07529	0.00075	0.05381	0.0019	1061.9	7.6	1058.6	11	1074	13	1059	37	99.6892	98.5661
79	91500-8	8478c_TRA_Data	04/11/2018 (1)	28.112	142	79.1	29.88	0.37775	43	137700	3202.33	1.851	0.024	0.1814	0.0023	0.49445	5.51268	0.056	0.07424	0.00085	0.05391	0.0019	1062.7	8.4	1074	12	1046	12	1061	37	101.063	102.677
80	91500-10	8478c_TRA_Data	04/11/2018 (1)	28.118	141	78.9	29.36	0.372117	29	140100	4831.03	1.848	0.023	0.18	0.0023	0.58349	5.55556	0.058	0.07448	0.00079	0.05448	0.0019	1061.6	8.4	1067	13	1057	12	1072	37	100.509	100.946
81	91500-11	8478c_TRA_Data	04/11/2018 (1)	28.112	142	82.5	31.12	0.377212	15	146500	9766.67	1.851	0.023	0.1791	0.0023	0.60082	5.58347	0.061	0.07492	0.00081	0.05305	0.0019	1062.7	8.3	1062	13	1065	12	1044	36	99.9341	99.7183
82	91500-12	8478c_TRA_Data	04/11/2018 (1)	28.121	141	79.1	29.56	0.373704	32	139800	4368.75	1.849	0.024	0.1777	0.0023	0.56299	5.62746	0.062	0.07524	0.00081	0.05365	0.0019	1061.9	8.6	1054	13	1076	14	1056	37	99.2561	97.9554
83	91500-1	8479c_TRA_Data	04/11/2018 (1)	28.11	142	80.3	29.99	0.373474	16	138200	8637.5	1.848	0.034	0.179	0.0026	0.60029	5.58659	0.059	0.075	0.0015	0.05341	0.0014	1061.4	12	1061	14	1067	24	1051	28	99.9623	99.4377
84	91500-2	8479c_TRA_Data	04/11/2018 (1)	28.117	142	80.1	29.91	0.373408	53	137600	2596.23	1.85	0.033	0.179	0.0025	0.59088	5.58659	0.057	0.07519	0.0015	0.0542	0.0015	1063.3	12	1062.3	14	1072	23	1066	28	99.906	99.0951
85	91500-3	8479c_TRA_Data	04/11/2018 (1)	28.119	142	79.5	30.15	0.379245	41	136900	3339.02	1.854	0.036	0.1802	0.0026	0.67295	5.54939	0.058	0.07476	0.0015	0.05263	0.0014	1066	13	1068	14	1061	21	1036	27	100.188	100.66
86	91500-4	8479c_TRA_Data	04/11/2018 (1)	28.117	142	80.1	30	0.374532	71	137100	1930.99	1.846	0.034	0.1787	0.0026	0.63847	5.59597	0.057	0.07483	0.0015	0.0544	0.0015	1060.7	12	1059.6	14	1062	22	1071	28	99.8963	99.774
87	91500-5	8479c_TRA_Data	04/11/2018 (1)	28.205	142	80	29.94	0.37425	61	137100	2247.54	1.853	0.034	0.1791	0.0025	0.65472	5.58347	0.056	0.07511	0.0015	0.054	0.0015	1063.2	12	1062	14	1069	24	1062	28	99.8871	99.3452
88	91500-6	8479c_TRA_Data	04/11/2018 (1)	28.125	142	81	29.87	0.368765	8	144200	18025	1.836	0.033	0.1789	0.0026	0.60603	5.58971	0.059	0.0742	0.0015	0.05424	0.0014	1058.4	11	1061	14	1045	25	1067	27	100.246	101.531
89	91500-7	8479c_TRA_Data	04/11/2018 (1)	28.13	142	79.2	30.2	0.381313	38	140700	3702.63	1.865	0.033	0.1794	0.0025	0.62106	5.57414	0.052	0.07501	0.0015	0.05335	0.0014	1067.5	12	1063.4	14	1068	21	1053	29	99.6159	99.5693
90	91500-8	8480c_TRA_Data	04/11/2018 (1)	28.119	141	80.2	29.96	0.373566	15	136100	9073.33	1.855	0.034	0.1794	0.0025	0.57544	5.57414	0.056	0.07476	0.0015	0.05401	0.0014	1065.2	12	1063.7	14	1058	22	1063	27	99.8592	100.539
91	91500-9	8480c_TRA_Data	04/11/2018 (1)	28.124	141	79.8	30.01	0.376065	72	134600	1869.44	1.842	0.032	0.1789	0.0026	0.61573	5.58971	0.059	0.07445	0.0015	0.05404	0.0015	1059.7	11	1061	14	1054	23	1063	28	100.123	100.664
92	91500-10	8480c_TRA_Data	04/11/2018 (1)	28.108	142	79.8	30.24	0.378947	19	135200	7115.79	1.865	0.034	0.1785	0.0026	0.64634	5.60224	0.058	0.07612	0.0015	0.0543	0.0015	1067.4	12	1058	14	1096	23	1068	29	99.1194	96.5328
93	91500-11	8480c_TRA_Data	04/11/2018 (1)	28.105	141	80.6	29.62	0.367494	21	138400	6590.48	1.841	0.034	0.1803	0.0027	0.61223	5.54631	0.062	0.07435	0.0015	0.0533	0.0015	1059	12	1068	15	1054	25	1050	30	100.85	101.328
94	91500-12	8480c_TRA_Data	04/11/2018 (1)	28.128	142	79.7	30.19	0.378795	53	136000	2566.04	1.846	0.034	0.1788	0.0027	0.66258	5.59284	0.062	0.07481	0.0015	0.05322	0.0014	1060.7	12	1060	15	1061	25	1048	26	99.934	99.9057
95	91500-1	8481c_TRA_Data	04/11/2018 (1)	28.126	142	78.7	29.55	0.375476	84	143000	1702.38	1.838	0.037	0.179	0.0029	0.43066	5.58659	0.056	0.07511	0.0014	0.05441	0.0035	1058.1	13	1061.4	16	1069	21	1071	68	100.312	99.2891
96	91500-2	8481c_TRA_Data	04/11/2018 (1)	28.114	141	80.8	30.32	0.375248	36	147800	4105.56	1.836	0.036	0.1796	0.0029	0.50751	5.56793	0.055	0.07425	0.0013	0.0538	0.0036	1058.5	12	1064.5	16	1049	19	1059	68	100.567	101.478
97	91500-3	8481c_TRA_Data	04/11/2018 (1)	28.134	142	82.3	30.89	0.375334	76	149700	1969.74	1.842	0.036	0.1787	0.003	0.57807	5.59597	0.061	0.07489	0.0013	0.05317	0.0034	1059.5	13	1060	16	1066	19	1047	66	100.047	99.4371
98	91500-4	8481c_TRA_Data	04/11/2018 (1)	28.119	142	79.2	29.62	0.37399	52	144700	2782.69	1.876	0.038	0.1792	0.003	0.61715	5.58036	0.062	0.07564	0.0013	0.05327	0.0035	1071.4	13	1063	16	1084	19	1049	67	99.216	98.0627
99	91500-5	8481c_TRA_Data	04/11/2018 (1)	28.118	142	79.4	29.8	0.375315	28	145900	5210.71	1.861	0.038	0.1792	0.003	0.68547	5.58036	0.065	0.07436	0.0012	0.0542	0.0036	1066.1	13	1062	17	1051	20	1066	68	99.6154	101.047
100	91500-6	8481c_TRA_Data	04/11/2018 (1)	28.117	142	80.3	30.39	0.378456	31	144400	4658.06	1.863	0.038	0.1792	0.0029	0.53688	5.58036	0.059	0.07549	0.0013	0.05411	0.0035	1066.7	13	1062	16	1080	21	1065	67	99.5594	98.3333
101	91500-7	8481c_TRA_Data	04/11/2018 (1)	28.117	142	79.1	29.47	0.372566	73	142300	1949.32	1.841	0.037	0.1792	0.003	0.50173	5.58036	0.06	0.07464	0.0013	0.0543	0.0036	1059	13	1062	16	1059	24	1069	69	100.283	100.283
102	91500-8	8482c_TRA_Data	04/11/2018 (1)	28.127	142	80	30.24	0.378	17	153700	9041.18	1.845	0.037	0.1791	0.003	0.57346	5.58347	0.058	0.07474	0.0013	0.05285	0.0034	1061.6	13	1062	16	1060	22	1041	66	100.038	100.189
103	91500-9	8482c_TRA_Data	04/11/2018 (1)	28.12	141	80.1	29.64	0.370037	13	154200	11861.5	1.871	0.037	0.1792	0.003	0.58552	5.58036	0.062	0.07552	0.0013	0.0534	0.0035	1070.9	14	1062	16	1081	18	1052	67	99.1689	98.2424
104	91500-10	8482c_TRA_Data	04/11/2018 (1)	28.118	142	85.1	32.02	0.376263	18	147500	8194.44	1.834	0.038	0.179	0.0029	0.63352	5.58659	0.06	0.07514	0.0013	0.05274	0.0034	1056.5	13	1061	16	1071	22	1039	66	100.426	99.0663
105	91500-11	8482c_TRA_Data	04/11/2018 (1)	28.126	141	76.2	26.84	0.352231	36	130400	3622.22	1.842	0.039	0.1795	0.0032	0.624	5.57103	0.071	0.07437	0.0013	0.0574	0.0038	1059.3	14	1064	17	1054	19	1128	72	100.444	100.949
106	91500-12	8482c_TRA_Data	04/11/2018 (1)	28.119	141	78.5	30.49	0.388408	49	132700	2708.16	1.855	0.038	0.179	0.0032	0.58631	5.58659	0.075	0.07461	0.0014	0.0529	0.0035	1064.1	13	1061	18	1061	20	1042	67	99.7087	100
107	91500-1	8483c_TRA_Data	04/11/2018 (1)	28.118	142	78.6	29.95	0.381043	55	145100	2638.18	1.852	0.035	0.1796	0.0027	0.50527	5.56793	0.056	0.07448	0.0011	0.0543	0.0021	1062.8	12	1064.4	14	1053	18	1069	41	100.151	101.083
108	91500-2	8483c_TRA_Data	04/11/2018 (1)	28.119	141	82.3	30.11	0.365857	22	151600	6890.91	1.858	0.035	0.1805	0.0027	0.59305	5.54017	0.057	0.07444	0.00099	0.05371	0.002	1065	12	1069	15	1055	15	1057	39	100.376	101.327
109	91500-3	8483c_TRA_Data	04/11/2018 (1)	28.127	142	82.3	30.13	0.3661	42	149000	3547.62	1.837	0.034	0.177	0.0027	0.57481	5.64972	0.063	0.07529	0.001	0.053	0.0021	1057.8	12	1050	15	1074	14	1044	40	99.2626	97.7654
110	91500-4	8483c_TRA_Data	04/11/2018 (1)	28.127	142	77.4	29.77	0.384625	35	143300	4094.29	1.864	0.036	0.1803	0.0028	0.66057	5.54631	0.064	0.07493	0.001	0.05264	0.002	1067.2	13	1068	15	1066	15	1037	38	100.075	100.188
111	91500-5	8483c_TRA_Data	04/11/2018 (1)	28.116	142	79.2	30.07	0.379672	46	145000	3152.17	1.838	0.033	0.1787	0.0026	0.631	5.59597	0.058	0.0746	0.00093	0.0551	0.0021	1058.1	12	1059.5	14	1059	14	1084	40	100.132	100.047
112	91500-6	8483c_TRA_Data	04/11/2018 (1)	28.126	142	81.6	30.02	0.367892	24	148600	6191.67	1.838	0.034	0.179	0.0026	0.62795	5.58659	0.055	0.07487	0.00095	0.05457	0.0021	1058.3	12	1061.1	14	1064	15	1074	40	100.265	99.7274
113	91500-7	8483c_TRA_Data	04/11/2018 (1)	28.106	141	79.7	29.97	0.376035	19	144600	7610.53	1.852	0.033	0.1786	0.0027	0.59958	5.5991	0.061	0.07572	0.00099	0.05361	0.002	1064.2	11	1059	15	1084	13	1055	39	99.5114	97.6937
114	91500-8	8484c_TRA_Data	04/11/2018 (1)	28.125	142	79.6	30.01	0.37701	17	142600	8388.24	1.878	0.033	0.1797	0.0025	0.43971	5.56483	0.048	0.07547	0.001	0.0525	0.002	1072.5	12	1066	13	1078	14	1034	39	99.3939	98.8868
115	91500-9	8484c_TRA_Data	04/11/2018 (1)	28.12	141	79.7	29.99	0.376286	41	142200	3468.29	1.848	0.033	0.1793	0.0026	0.44815	5.57724	0.054	0.07461	0.001	0.05372	0.002	1062	12	1063.2	14	1057	16	1057	39	100.113	100.587
116	91500-10	8484c_TRA_Data	04/11/2018 (1)	28.114	142	80	30.04	0.3755	3	142400	47466.7	1.849	0.034	0.1795	0.0026	0.51938	5.57103	0.053	0.07471	0.001	0.05343	0.002	1061.9	12	1063.9	14	1058	15	1052	38	100.188	100.558
117	91500-11	8484c_TRA_Data	04/11/2018 (1)	28.118	142	79.8	29.94	0.375188	7	141600	20228.6	1.843	0.033	0.1787	0.0026	0.53759	5.59597	0.056	0.07487	0.00098	0.05429	0.0021	1060.1	12	1059.5	14	1064	14	1068	39	99.9434	99.5771
118	91500-12	8484c_TRA_Data	04/11/2018 (1)	28.123	142	80.4	30.03	0.373507	13	143100	11007.7	1.842	0.035	0.1791	0.0027	0.59706	5.58347	0.058	0.07453	0.00099	0.0541	0.0021	1059.2	12	1062	15	1060	15	1064	39	100.264	100.189
119	91500-1	8485c_TRA_Data	04/11/2018 (1)	28.129	140	78.8	29.73	0.377284	75	142300	1897.33	1.863	0.031	0.1818	0.007	0.6474	5.50055	0.057	0.07437	0.001	0.0533	0.0019	1067	22	1078	39	1051	14	1048	36	101.031	102.569
120	91500-2	8485c_TRA_Data	04/11/2018 (1)	28.126	142	82.3	30.21	0.367072	37	144500	3905.41	1.834	0.03	0.1769	0.0068	0.63735	5.65291	0.063	0.07526	0.001	0.0538	0.0019	1056.6	22	1050	37	1075	16	1058	37	99.3754	97.6744
121	91500-3	8485c_TRA_Data	04/11/2018 (1)	28.116	141	79.7	29.88	0.374906	45	141600	3146.67	1.878	0.032	0.1805	0.0069	0.61689	5.54017	0.056	0.07561	0.0011	0.0537	0.0019	1073.4	21	1069.6	38	1084	15	1057	37	99.646	98.6716
122	91500-4	8485c_TRA_Data	04/11/2018 (1)	28.139	142	79.3	29.85	0.376419	89	141500	1589.89	1.851	0.03	0.1807	0.007	0.71859	5.53403	0.062	0.07439	0.00099	0.055	0.0019	1063.6	22	1071	38	1051	15	1083	37	100.696	101.903
123	91500-5	8485c_TRA_Data	04/11/2018 (1)	28.107	142	82.4	30.7	0.372573	50	143300	2866	1.822	0.03	0.1762	0.0068	0.66932	5.67537	0.063	0.07482	0.0011	0.05307	0.0019	1052	22	1046	37	1061	18	1045	36	99.4297	98.5862
124	91500-6	8485c_TRA_Data	04/11/2018 (1)	28.128	142	77.4	29.72	0.383979	46	133900	2910.87	1.864	0.03	0.1803	0.007	0.70735	5.54631	0.058	0.07496	0.001	0.05398	0.0019	1067.1	22	1068	38	1066	14	1062	36	100.084	100.188
125	91500-7	8485c_TRA_Data	04/11/2018 (1)	28.111	141	80.1	30.04	0.375031	32	134900	4215.62	1.824	0.03	0.1761	0.0068	0.66621	5.67859	0.063	0.0752	0.0011	0.05319	0.0019	1052.7	22	1045	37	1074	18	1047	36	99.2685	97.2998
126	91500-9	8485c_TRA_Data	04/11/2018 (1)	28.111	142	78.5	29.73	0.378726	11	132300	12027.3	1.871	0.03	0.1822	0.0071	0.64341	5.48847	0.065	0.07486	0.001	0.0542	0.0019	1069.9	22	1078	38	1062	16	1067	37	100.757	101.507
127	91500-8	8485c_TRA_Data	04/11/2018 (1)	28.119	141	81.7	30.23	0.370012	96	135400	1410.42	1.834	0.03	0.1781	0.0069	0.6737	5.61482	0.06	0.07469	0.001	0.05353	0.0018	1056.3	22	1056	38	1060	16	1054	35	99.9716	99.6226
128	91500-1	8582c_TRA_Data	16/11/2018 (6)	28.121	142	83.2	31.49	0.378486	37	221100	5975.68	1.849	0.03	0.1793	0.0029	0.52297	5.57724	0.055	0.07473	0.0015	0.05391	0.00088	1062.3	25	1062.8	16	1059	22	1061	17	100.047	100.359
129	91500-2	8582c_TRA_Data	16/11/2018 (6)	28.151	142	78.6	29.91	0.380534	17	209100	12300	1.847	0.03	0.1798	0.0028	0.48625	5.56173	0.05	0.07477	0.0015	0.05342	0.00078	1061.5	25	1065.6	15	1061	22	1052	15	100.386	100.434
130	91500-3	8582c_TRA_Data	16/11/2018 (6)	28.111	141	79.3	29.58	0.373014	42	210900	5021.43	1.856	0.03	0.1799	0.0028	0.57835	5.55864	0.05	0.07535	0.0015	0.05365	0.00083	1064.7	25	1066	15	1075	24	1056	16	100.122	99.1628
131	91500-4	8582c_TRA_Data	16/11/2018 (6)	28.164	142	78.6	29.49	0.375191	61	209100	3427.87	1.851	0.03	0.1794	0.0029	0.63007	5.57414	0.055	0.07478	0.0015	0.05394	0.0009	1062.9	25	1063.4	16	1063	24	1062	17	100.047	100.038
132	91500-5	8582c_TRA_Data	16/11/2018 (6)	28.244	142	80.3	29.71	0.369988	29	211300	7286.21	1.846	0.03	0.1771	0.0028	0.49077	5.64653	0.05	0.07464	0.0015	0.05381	0.00077	1061	25	1051.1	15	1058	23	1059	15	99.0669	99.3478
133	91500-6	8582c_TRA_Data	16/11/2018 (6)	28.113	142	80.5	29.97	0.372298	24	214300	8929.17	1.85	0.03	0.1791	0.0028	0.59355	5.58347	0.052	0.07486	0.0015	0.05443	0.00093	1062.6	25	1061.7	15	1067	22	1071	18	99.9153	99.5033
134	91500-7	8582c_TRA_Data	16/11/2018 (6)	28.156	142	79.9	30.16	0.377472	32	213500	6671.88	1.85	0.03	0.1801	0.0028	0.6076	5.55247	0.047	0.0749	0.0014	0.05342	0.00082	1063.5	24	1067.1	15	1062.3	20	1052	16	100.339	100.452
135	91500-9	8583c_TRA_Data	16/11/2018 (6)	28.121	142	80.6	29.94	0.371464	6	213000	35500	1.85	0.03	0.1785	0.0028	0.60248	5.60224	0.054	0.07488	0.0015	0.05348	0.00081	1062.6	25	1059.8	16	1063	24	1053	16	99.7365	99.699
136	91500-10	8583c_TRA_Data	16/11/2018 (6)	28.13	142	80	30.11	0.376375	1	210800	210800	1.845	0.03	0.1796	0.0028	0.49818	5.56793	0.051	0.0745	0.0015	0.05399	0.00085	1060.5	25	1064.9	15	1053	24	1063	16	100.415	101.13
137	91500-11	8583c_TRA_Data	16/11/2018 (6)	28.282	142	79	29.89	0.378354	28	207100	7396.43	1.861	0.03	0.1794	0.0029	0.59207	5.57414	0.056	0.07548	0.0015	0.05337	0.00092	1066.3	25	1063.2	16	1080	24	1051	18	99.7093	98.4444
138	91500-12	8583c_TRA_Data	16/11/2018 (6)	28.111	142	80.5	30.09	0.373789	4	210200	52550	1.846	0.03	0.1785	0.0029	0.64954	5.60224	0.052	0.07464	0.0015	0.05392	0.00084	1061	25	1058.8	16	1056	24	1063	16	99.7926	100.265
139	91500-1	8584c_TRA_Data	16/11/2018 (6)	28.147	142	79.3	29.97	0.377932	43	207200	4818.6	1.847	0.03	0.1792	0.0023	0.53345	5.58036	0.046	0.07494	0.0081	0.05426	0.0098	1061.4	25	1062.7	13	1065	24	1068	190	100.122	99.784
140	91500-3	8584c_TRA_Data	16/11/2018 (6)	28.122	141	79.7	30.01	0.376537	8	208500	26062.5	1.844	0.03	0.1794	0.0024	0.54432	5.57414	0.052	0.07445	0.008	0.05343	0.0097	1060.6	25	1063.7	13	1056	26	1052	190	100.292	100.729
141	91500-5	8584c_TRA_Data	16/11/2018 (6)	28.118	142	80.1	30.04	0.375031	29	209200	7213.79	1.833	0.03	0.1785	0.0023	0.57116	5.60224	0.046	0.07469	0.008	0.05311	0.0096	1056.7	25	1059.5	12	1059	26	1046	180	100.265	100.047
142	91500-7	8585c_TRA_Data	16/11/2018 (6)	28.16	142	80.1	29.83	0.372409	32	215400	6731.25	1.845	0.03	0.1808	0.0025	0.6189	5.53097	0.055	0.07422	0.008	0.05306	0.0096	1060.5	25	1071.3	14	1047	26	1045	180	101.018	102.321
143	91500-8	8585c_TRA_Data	16/11/2018 (6)	28.121	142	80.7	29.92	0.370756	8	214800	26850	1.809	0.03	0.1785	0.0025	0.51073	5.60224	0.054	0.07359	0.0079	0.05309	0.0096	1047.8	25	1058.8	13	1028	26	1045	180	101.05	102.996
144	91500-9	8585c_TRA_Data	16/11/2018 (6)	28.116	142	78.9	30.04	0.380735	5	211800	42360	1.842	0.03	0.1796	0.0023	0.59491	5.56793	0.052	0.07425	0.008	0.05278	0.0096	1059.6	25	1064.6	13	1050	24	1039	180	100.472	101.39
145	91500-12	8585c_TRA_Data	16/11/2018 (6)	28.158	142	79.4	29.62	0.373048	14	211900	15135.7	1.819	0.03	0.1788	0.0023	0.49724	5.59284	0.05	0.07379	0.008	0.05264	0.0095	1051.6	25	1060.4	13	1033	24	1037	180	100.837	102.652
146	91500-1	8537c_TRA_Data	13/11/2018 (3)	28.145	141	79.6	29.7	0.373116	36	182200	5061.11	1.851	0.021	0.1806	0.0017	0.52858	5.5371	0.054	0.07395	0.00083	0.05391	0.00099	1062.7	7.4	1069.9	9.5	1046	13	1061	19	100.678	102.285
147	91500-2	8537c_TRA_Data	13/11/2018 (3)	28.112	141	81.4	30.11	0.369902	2	183800	91900	1.848	0.02	0.1782	0.0019	0.63481	5.61167	0.058	0.0752	0.0008	0.05395	0.00083	1061.8	7	1057	10	1072	12	1062	16	99.5479	98.6007
148	91500-3	8537c_TRA_Data	13/11/2018 (3)	28.168	142	80.9	30.24	0.373795	12	183600	15300	1.851	0.019	0.1789	0.0018	0.56257	5.58971	0.055	0.07508	0.00079	0.05352	0.00094	1062.9	6.8	1060.6	9.6	1070	12	1054	18	99.7836	99.1215
149	91500-4	8537c_TRA_Data	13/11/2018 (3)	28.15	142	81.2	30.58	0.376601	30	184800	6160	1.851	0.021	0.1785	0.0018	0.5944	5.60224	0.058	0.07532	0.00082	0.05415	0.00092	1062.8	7.4	1059	10	1075	12	1066	18	99.6425	98.5116
150	91500-5	8537c_TRA_Data	13/11/2018 (3)	28.19	142	79.5	29.68	0.373333	23	182900	7952.17	1.85	0.02	0.1805	0.0019	0.64167	5.54017	0.061	0.07443	0.00078	0.05326	0.00081	1062.4	7	1069	10	1052	12	1049	16	100.621	101.616
151	91500-6	8537c_TRA_Data	13/11/2018 (3)	28.122	142	76.9	29.43	0.382705	14	176300	12592.9	1.849	0.018	0.1783	0.0017	0.47769	5.60853	0.053	0.07551	0.00083	0.05403	0.00085	1062.5	6.3	1057.4	9.1	1080	13	1063	16	99.52	97.9074
152	91500-7	8537c_TRA_Data	13/11/2018 (3)	28.111	142	80.7	30.84	0.382156	13	185400	14261.5	1.851	0.02	0.1791	0.0018	0.54702	5.58347	0.056	0.07513	0.00084	0.05336	0.0009	1062.9	7	1062	10	1070	12	1050	17	99.9153	99.2523
153	91500-8	8537c_TRA_Data	13/11/2018 (3)	28.114	141	77.4	28.59	0.36938	21	178600	8504.76	1.847	0.023	0.1784	0.0019	0.59838	5.60538	0.06	0.07464	0.00085	0.05376	0.00083	1061.3	8.2	1058	10	1058	12	1058	16	99.6891	100
154	91500-9	8537c_TRA_Data	13/11/2018 (3)	28.161	142	80.3	29.98	0.37335	9	185200	20577.8	1.851	0.021	0.1792	0.0018	0.59561	5.58036	0.054	0.07469	0.00081	0.05382	0.00095	1062.7	7.5	1062.1	9.7	1059	12	1059	18	99.9435	100.293
155	91500-10	8538c_TRA_Data	13/11/2018 (3)	28.151	142	79.8	29.89	0.374561	18	188100	10450	1.856	0.021	0.1804	0.0021	0.66714	5.54324	0.064	0.07507	0.00079	0.05367	0.00093	1064.5	7.4	1069	11	1069	12	1056	18	100.423	100
156	91500-11	8538c_TRA_Data	13/11/2018 (3)	28.148	142	82.4	31.15	0.378034	37	194700	5262.16	1.848	0.02	0.1803	0.0018	0.64797	5.54631	0.056	0.07463	0.00078	0.05356	0.00091	1061.7	7.1	1068	10	1058	12	1054	17	100.593	100.945
157	91500-12	8538c_TRA_Data	13/11/2018 (3)	28.14	142	80.6	29.73	0.368859	11	188900	17172.7	1.847	0.022	0.1781	0.0017	0.51636	5.61482	0.056	0.07493	0.00091	0.05396	0.00088	1061.3	8	1057.9	9.8	1064	14	1064	17	99.6796	99.4267
158	91500-1	8540c_TRA_Data	13/11/2018 (3)	28.12	142	79.8	30.08	0.376942	34	193000	5676.47	1.849	0.02	0.1789	0.0043	0.65579	5.58971	0.052	0.07502	0.001	0.05364	0.0011	1062.2	7	1060.7	23	1069	15	1056	21	99.8588	99.2236
159	91500-2	8540c_TRA_Data	13/11/2018 (3)	28.149	142	79.3	29.77	0.37541	9	194400	21600	1.855	0.023	0.1794	0.0044	0.64109	5.57414	0.066	0.07493	0.0011	0.05396	0.0011	1063.9	8.3	1064	24	1064	17	1062	22	100.009	100
160	91500-3	8540c_TRA_Data	13/11/2018 (3)	28.125	141	79.9	29.95	0.374844	9	196100	21788.9	1.842	0.02	0.1785	0.0042	0.45592	5.60224	0.052	0.07478	0.001	0.05361	0.0011	1059.6	7.1	1058.5	23	1069	16	1057	20	99.8962	99.0178
161	91500-4	8540c_TRA_Data	13/11/2018 (3)	28.141	142	81.3	30.4	0.373924	5	202700	40540	1.851	0.019	0.1805	0.0043	0.53433	5.54017	0.053	0.07428	0.001	0.05365	0.0011	1063	6.7	1069.7	24	1052	16	1056	20	100.63	101.683
162	91500-5	8540c_TRA_Data	13/11/2018 (3)	28.151	142	80.5	30.02	0.372919	64	199600	3118.75	1.854	0.019	0.1786	0.0043	0.54996	5.5991	0.057	0.07542	0.0011	0.05379	0.0011	1064	6.7	1059	23	1077	14	1059	21	99.5301	98.3287
163	91500-6	8540c_TRA_Data	13/11/2018 (3)	28.126	142	78.2	29.37	0.375575	2	183100	91550	1.843	0.019	0.1781	0.0043	0.59151	5.61482	0.056	0.07506	0.001	0.05368	0.0011	1060.3	6.9	1056.2	23	1071	15	1057	22	99.6133	98.6181
164	91500-7	8540c_TRA_Data	13/11/2018 (3)	28.119	141	81.5	30.51	0.374356	12	193100	16091.7	1.855	0.02	0.1795	0.0042	0.66435	5.57103	0.049	0.07495	0.00095	0.05378	0.0011	1065.3	6.9	1064.3	23	1063	17	1059	21	99.9061	100.122
165	91500-8	8541c_TRA_Data	13/11/2018 (3)	28.121	142	80.5	29.98	0.372422	4	188900	47225	1.85	0.02	0.1801	0.0044	0.58309	5.55247	0.058	0.07471	0.001	0.0539	0.0012	1062.8	7	1067	24	1059	16	1060	23	100.395	100.755
166	91500-9	8541c_TRA_Data	13/11/2018 (3)	28.126	142	79.5	30	0.377358	10	185900	18590	1.855	0.021	0.1798	0.0043	0.59721	5.56173	0.054	0.07463	0.001	0.05363	0.0011	1064.1	7.5	1065.6	23	1060	16	1056	22	100.141	100.528
167	91500-10	8542c_TRA_Data	13/11/2018 (3)	28.126	142	80.4	30.1	0.374378	50	180900	3618	1.846	0.019	0.1774	0.0042	0.64078	5.63698	0.058	0.07537	0.001	0.05369	0.001	1061.3	6.9	1054	23	1079	16	1057	20	99.3122	97.683
168	91500-11	8542c_TRA_Data	13/11/2018 (3)	28.111	142	79.1	29.88	0.37775	18	180600	10033.3	1.854	0.021	0.1807	0.0043	0.48196	5.53403	0.053	0.07433	0.0011	0.05385	0.0012	1065	7.3	1070.4	23	1051	17	1060	23	100.507	101.846
169	91500-12	8542c_TRA_Data	13/11/2018 (3)	28.122	142	80.5	30.05	0.373292	20	181000	9050	1.846	0.021	0.1783	0.0042	0.51205	5.60853	0.052	0.07496	0.001	0.0537	0.0012	1061.1	7.5	1057.5	23	1065	16	1057	22	99.6607	99.2958
170	91500-1	8543c_TRA_Data	13/11/2018 (3)	28.114	141	78.9	29.94	0.379468	21	178800	8514.29	1.863	0.039	0.179	0.0035	0.59539	5.58659	0.059	0.07514	0.00074	0.0536	0.0018	1067	14	1061	19	1070	11	1055	35	99.4377	99.1589
171	91500-2	8543c_TRA_Data	13/11/2018 (3)	28.121	141	80.4	29.94	0.372388	6	180400	30066.7	1.83	0.038	0.1764	0.0033	0.60168	5.66893	0.053	0.07481	0.00071	0.05414	0.0018	1055.4	14	1047.2	18	1061	11	1065	34	99.223	98.6993
172	91500-3	8543c_TRA_Data	13/11/2018 (3)	28.167	141	79.8	30.26	0.379198	26	182100	7003.85	1.852	0.039	0.1803	0.0034	0.62264	5.54631	0.055	0.0745	0.0007	0.05318	0.0018	1063	14	1068.5	19	1053	11	1047	35	100.517	101.472
173	91500-4	8543c_TRA_Data	13/11/2018 (3)	28.109	141	83	31.2	0.375904	26	189400	7284.62	1.867	0.037	0.1809	0.0033	0.55748	5.52792	0.048	0.07503	0.00064	0.05383	0.0018	1068.7	13	1071.4	18	1067.8	9.5	1059	34	100.253	100.337
174	91500-5	8543c_TRA_Data	13/11/2018 (3)	28.111	142	79.5	29.43	0.370189	53	178600	3369.81	1.832	0.038	0.1784	0.0034	0.5291	5.60538	0.055	0.0749	0.00074	0.05382	0.0018	1056.4	13	1057.9	19	1064	12	1059	35	100.142	99.4267
175	91500-6	8543c_TRA_Data	13/11/2018 (3)	28.114	142	80.6	29.73	0.368859	29	182000	6275.86	1.85	0.038	0.1801	0.0036	0.5091	5.55247	0.062	0.07492	0.00082	0.05376	0.0017	1062.7	14	1067	19	1065	11	1058	33	100.405	100.188
176	91500-7	8543c_TRA_Data	13/11/2018 (3)	28.113	142	78.6	29.47	0.374936	1	177600	177600	1.857	0.039	0.1801	0.0034	0.58159	5.55247	0.054	0.07488	0.00069	0.05371	0.0018	1065.1	14	1067.3	19	1070	11	1057	35	100.207	99.7477
177	91500-8	8544c_TRA_Data	13/11/2018 (3)	28.112	142	77.9	29.11	0.373684	35	174200	4977.14	1.841	0.039	0.1785	0.0035	0.54931	5.60224	0.058	0.07482	0.00076	0.05371	0.0018	1059.2	14	1058	19	1067	12	1057	34	99.8867	99.1565
178	91500-9	8544c_TRA_Data	13/11/2018 (3)	28.122	142	80	30.35	0.379375	39	179800	4610.26	1.855	0.04	0.179	0.0034	0.71744	5.58659	0.059	0.07492	0.00064	0.05377	0.0018	1064.2	14	1061.3	19	1067.2	9.9	1058	34	99.7275	99.4472
179	91500-10	8544c_TRA_Data	13/11/2018 (3)	28.117	142	80.9	30.38	0.375525	12	180000	15000	1.849	0.039	0.1789	0.0034	0.67295	5.58971	0.058	0.07485	0.00066	0.05371	0.0018	1062	14	1060.9	19	1062.7	9.6	1057	35	99.8964	99.8306
180	91500-11	8544c_TRA_Data	13/11/2018 (3)	28.113	141	80.5	29.98	0.372422	21	179300	8538.1	1.839	0.038	0.1785	0.0034	0.60966	5.60224	0.056	0.07484	0.00071	0.05378	0.0018	1058.6	14	1058	19	1061.3	9.8	1059	34	99.9433	99.6891
181	91500-12	8544c_TRA_Data	13/11/2018 (3)	28.121	142	80.3	30.24	0.376588	9	179100	19900	1.862	0.039	0.1797	0.0034	0.4862	5.56483	0.05	0.07496	0.00075	0.05372	0.0018	1066.8	14	1065.3	18	1069	12	1057	34	99.8594	99.6539
182	91500-1	8545c_TRA_Data	13/11/2018 (3)	28.163	142	79.8	30.34	0.380201	35	180500	5157.14	1.88	0.048	0.1803	0.0032	0.59042	5.54631	0.05	0.07553	0.00084	0.05409	0.0019	1073.3	17	1068.2	18	1084	13	1064	36	99.5248	98.5424
183	91500-2	8545c_TRA_Data	13/11/2018 (3)	28.121	142	80.3	30.41	0.378705	1	180500	180500	1.854	0.048	0.1797	0.0032	0.53235	5.56483	0.051	0.07482	0.00088	0.05315	0.0018	1064	17	1065	18	1064	14	1047	35	100.094	100.094
184	91500-3	8545c_TRA_Data	13/11/2018 (3)	28.119	142	79.5	29.89	0.375975	10	176700	17670	1.831	0.047	0.1771	0.0032	0.56192	5.64653	0.056	0.07486	0.00089	0.0533	0.0019	1055.9	17	1051.2	18	1064	14	1049	36	99.5549	98.797
185	91500-4	8545c_TRA_Data	13/11/2018 (3)	28.204	143	81.5	30.5	0.374233	15	184300	12286.7	1.872	0.048	0.1808	0.0033	0.59186	5.53097	0.05	0.07517	0.00088	0.05495	0.0019	1070.4	17	1071	18	1070	12	1081	36	100.056	100.093
186	91500-5	8545c_TRA_Data	13/11/2018 (3)	28.182	142	78.6	29.21	0.371628	34	175000	5147.06	1.83	0.046	0.1782	0.0032	0.65363	5.61167	0.048	0.07434	0.00078	0.05314	0.0019	1055.8	16	1056.9	17	1050.2	11	1046	36	100.104	100.638
187	91500-6	8545c_TRA_Data	13/11/2018 (3)	28.113	141	81.1	29.59	0.364858	5	178700	35740	1.819	0.046	0.1774	0.0034	0.55939	5.63698	0.059	0.07421	0.00088	0.05333	0.0018	1051.5	17	1052	18	1052	16	1050	35	100.048	100
188	91500-7	8545c_TRA_Data	13/11/2018 (3)	28.12	142	80.1	29.93	0.373658	47	178700	3802.13	1.859	0.048	0.18	0.0034	0.58264	5.55556	0.059	0.07503	0.00093	0.05425	0.0019	1066.5	17	1067	19	1068	14	1070	35	100.047	99.9064
189	91500-8	8545c_TRA_Data	13/11/2018 (3)	28.124	142	79	29.58	0.37443	2	173500	86750	1.85	0.048	0.179	0.0034	0.63918	5.58659	0.059	0.07512	0.00084	0.05403	0.0019	1063.6	18	1061	18	1067	14	1063	36	99.7555	99.4377
190	91500-9	8545c_TRA_Data	13/11/2018 (3)	28.128	141	80.5	30.67	0.380994	38	177500	4671.05	1.867	0.048	0.18	0.0034	0.6227	5.55556	0.059	0.07498	0.00086	0.05339	0.0019	1068.6	17	1066	18	1071	14	1051	36	99.7567	99.5331
191	91500-1	8547c_TRA_Data	13/11/2018 (3)	28.119	142	79.1	29.71	0.375601	8	169000	21125	1.862	0.043	0.1802	0.0031	0.59245	5.54939	0.061	0.07501	0.00079	0.0541	0.001	1066.5	15	1068	17	1068	13	1064	19	100.141	100
192	91500-2	8547c_TRA_Data	13/11/2018 (3)	28.107	142	80.4	30.31	0.37699	20	171500	8575	1.85	0.043	0.179	0.0031	0.61162	5.58659	0.059	0.07488	0.00073	0.05358	0.00086	1062.2	15	1061	17	1066	11	1055	16	99.887	99.531
193	91500-3	8547c_TRA_Data	13/11/2018 (3)	28.121	142	80.3	29.83	0.371482	6	170600	28433.3	1.834	0.043	0.1774	0.003	0.47506	5.63698	0.06	0.07483	0.00085	0.054	0.001	1057.6	15	1053	16	1067	13	1062	20	99.5651	98.6879
194	91500-4	8547c_TRA_Data	13/11/2018 (3)	28.124	141	80.6	30.39	0.377047	1	173000	173000	1.853	0.043	0.1801	0.0029	0.58362	5.55247	0.051	0.07485	0.00078	0.05373	0.00097	1064.4	16	1067.6	16	1063	12	1058	19	100.301	100.433
195	91500-5	8547c_TRA_Data	13/11/2018 (3)	28.11	142	80	29.96	0.3745	11	171600	15600	1.847	0.042	0.1793	0.003	0.66058	5.57724	0.055	0.07465	0.0007	0.05314	0.00097	1061.6	15	1062.8	16	1057	11	1046	19	100.113	100.549
196	91500-6	8547c_TRA_Data	13/11/2018 (3)	28.117	142	79.9	29.92	0.374468	31	159900	5158.06	1.837	0.042	0.1775	0.003	0.65052	5.6338	0.058	0.07502	0.00071	0.05386	0.00093	1057.7	15	1053	16	1067	13	1060	18	99.5556	98.6879
197	91500-7	8547c_TRA_Data	13/11/2018 (3)	28.113	141	79.6	29.96	0.376382	38	160400	4221.05	1.867	0.043	0.1803	0.0031	0.65179	5.54631	0.059	0.07495	0.00071	0.0539	0.001	1069.5	15	1068	17	1065	11	1062	19	99.8597	100.282
198	91500-8	8547c_TRA_Data	13/11/2018 (3)	28.13	142	80.9	30.16	0.372806	18	164100	9116.67	1.86	0.044	0.1794	0.003	0.52821	5.57414	0.057	0.07507	0.00083	0.05406	0.00099	1065.7	15	1064	17	1068	13	1064	19	99.8405	99.6255
199	91500-9	8547c_TRA_Data	13/11/2018 (3)	28.123	141	79.4	29.87	0.376196	15	161000	10733.3	1.844	0.042	0.1789	0.0031	0.5183	5.58971	0.062	0.07483	0.00085	0.05366	0.00086	1061.2	15	1061	17	1062	13	1056	17	99.9812	99.9058
200	91500-10	8548c_TRA_Data	13/11/2018 (3)	28.13	142	79.1	29.83	0.377118	6	161900	26983.3	1.875	0.043	0.1809	0.0031	0.55724	5.52792	0.06	0.07512	0.00079	0.05372	0.00091	1071.2	15	1072	17	1069	11	1057	18	100.075	100.281
201	91500-11	8548c_TRA_Data	13/11/2018 (3)	28.114	142	80.9	30.3	0.374536	60	163900	2731.67	1.826	0.041	0.1781	0.003	0.46624	5.61482	0.058	0.07433	0.0008	0.0536	0.0011	1054.2	15	1057	16	1049	13	1055	20	100.266	100.763
202	91500-12	8548c_TRA_Data	13/11/2018 (3)	28.116	142	79.9	29.89	0.374093	24	162900	6787.5	1.854	0.042	0.179	0.003	0.52022	5.58659	0.055	0.07504	0.0008	0.05367	0.00084	1064.7	15	1061	16	1068	13	1057	16	99.6525	99.3446
203	91500-1	8549c_TRA_Data	13/11/2018 (3)	28.122	142	78.3	29.46	0.376245	61	157600	2583.61	1.859	0.03	0.1792	0.0045	0.62761	5.58036	0.056	0.07483	0.0011	0.0539	0.0013	1066.8	22	1062.6	24	1065	16	1061	24	99.6063	99.7746
204	91500-2	8549c_TRA_Data	13/11/2018 (3)	28.124	142	82	30.71	0.374512	23	165500	7195.65	1.829	0.03	0.1784	0.0044	0.51859	5.60538	0.051	0.07427	0.0012	0.05349	0.0011	1055.2	22	1057.9	24	1047	19	1053	21	100.256	101.041
205	91500-3	8549c_TRA_Data	13/11/2018 (3)	28.113	142	78.3	29.68	0.379055	4	161100	40275	1.887	0.03	0.1822	0.0046	0.68807	5.48847	0.059	0.07505	0.0012	0.05378	0.0011	1075.6	22	1079	25	1069	18	1059	21	100.316	100.935
206	91500-4	8549c_TRA_Data	13/11/2018 (3)	28.12	142	82.3	30.64	0.372296	21	166600	7933.33	1.845	0.03	0.1781	0.0044	0.58957	5.61482	0.054	0.07505	0.0012	0.05389	0.0012	1060.6	22	1056.2	24	1070	19	1061	23	99.5851	98.7103
207	91500-5	8549c_TRA_Data	13/11/2018 (3)	28.139	142	79.6	29.61	0.371985	4	161100	40275	1.821	0.03	0.1783	0.0045	0.57916	5.60853	0.063	0.07452	0.0012	0.05368	0.0012	1053.1	22	1057	25	1053	20	1057	23	100.37	100.38
208	91500-6	8549c_TRA_Data	13/11/2018 (3)	28.126	142	79.6	29.77	0.373995	10	156800	15680	1.862	0.03	0.1787	0.0044	0.58781	5.59597	0.056	0.0752	0.0012	0.05372	0.0012	1067.7	22	1060.8	25	1072	19	1057	22	99.3538	98.9552
209	91500-7	8549c_TRA_Data	13/11/2018 (3)	28.117	142	79.8	30.12	0.377444	24	158400	6600	1.884	0.03	0.1803	0.0046	0.62783	5.54631	0.059	0.07524	0.0012	0.05376	0.0012	1074.3	22	1068	25	1073	20	1058	22	99.4136	99.534
210	91500-8	8550c_TRA_Data	13/11/2018 (3)	28.205	142	81.4	30.15	0.370393	13	165100	12700	1.811	0.03	0.1777	0.0044	0.56879	5.62746	0.053	0.07475	0.0012	0.05375	0.0012	1049.7	22	1054.2	24	1066	19	1058	23	100.429	98.8931
211	91500-9	8550c_TRA_Data	13/11/2018 (3)	28.152	142	79	29.94	0.378987	62	161600	2606.45	1.86	0.03	0.1803	0.0045	0.56996	5.54631	0.054	0.07553	0.0012	0.05374	0.0011	1066.1	21	1068.4	24	1083	20	1058	22	100.216	98.6519
212	91500-10	8550c_TRA_Data	13/11/2018 (3)	28.118	141	80.1	29.93	0.373658	29	154500	5327.59	1.858	0.03	0.1786	0.0045	0.6839	5.5991	0.06	0.07491	0.0012	0.05376	0.0012	1065	22	1059	24	1062	19	1058	23	99.4366	99.7175
213	91500-11	8550c_TRA_Data	13/11/2018 (3)	28.119	142	78.2	29.68	0.37954	20	153300	7665	1.859	0.03	0.1814	0.0045	0.67014	5.51268	0.053	0.07407	0.0012	0.0537	0.0011	1065.7	22	1074.1	24	1039.1	17	1057	22	100.788	103.368
214	91500-12	8550c_TRA_Data	13/11/2018 (3)	28.114	141	81.6	30.28	0.371078	37	155400	4200	1.847	0.03	0.177	0.0045	0.57374	5.64972	0.065	0.07521	0.0012	0.0538	0.0012	1061.2	22	1050	25	1076	19	1058	24	98.9446	97.5836
215	91500-1	8551c_TRA_Data	13/11/2018 (3)	28.116	142	84.1	30.16	0.358621	8	164200	20525	1.836	0.03	0.1775	0.0058	0.56414	5.6338	0.057	0.07509	0.016	0.05453	0.023	1057.4	16	1053	32	1069	20	1073	28	99.5839	98.5033
216	91500-2	8551c_TRA_Data	13/11/2018 (3)	28.109	142	78.7	29.76	0.378145	7	156700	22385.7	1.863	0.035	0.181	0.0059	0.5908	5.52486	0.056	0.07467	0.016	0.05478	0.023	1067.1	16	1072	32	1064	22	1078	28	100.459	100.752
217	91500-3	8551c_TRA_Data	13/11/2018 (3)	28.113	142	78.5	29.96	0.381656	17	153800	9047.06	1.841	0.035	0.1773	0.0058	0.56549	5.64016	0.054	0.07541	0.016	0.05398	0.023	1058.9	16	1051.7	32	1077	20	1062	36	99.32	97.6509
218	91500-4	8551c_TRA_Data	13/11/2018 (3)	28.122	141	79.6	30.15	0.378769	1	157300	157300	1.842	0.035	0.1791	0.0058	0.5217	5.58347	0.054	0.07467	0.016	0.0537	0.022	1059.6	16	1061.6	32	1056	22	1057	20	100.189	100.53
219	91500-5	8551c_TRA_Data	13/11/2018 (3)	28.126	142	81.1	30	0.369914	9	161300	17922.2	1.866	0.045	0.1808	0.006	0.68899	5.53097	0.061	0.07488	0.016	0.054	0.023	1067.9	16	1073	33	1064	20	1064	21	100.478	100.846
220	91500-6	8551c_TRA_Data	13/11/2018 (3)	28.117	141	79.4	30.01	0.37796	20	156900	7845	1.883	0.045	0.181	0.0059	0.57785	5.52486	0.056	0.07537	0.016	0.05254	0.022	1073.8	16	1072	32	1078	22	1035	34	99.8324	99.4434
221	91500-7	8551c_TRA_Data	13/11/2018 (3)	28.112	142	79.9	29.99	0.375344	58	157000	2706.9	1.849	0.045	0.1795	0.006	0.65605	5.57103	0.064	0.07463	0.016	0.05302	0.022	1062	16	1064	33	1060	19	1044	34	100.188	100.377
222	91500-8	8552c_TRA_Data	13/11/2018 (3)	28.112	142	79.9	30.02	0.37572	27	154400	5718.52	1.828	0.044	0.1782	0.0059	0.55666	5.61167	0.062	0.0744	0.015	0.053	0.022	1055.6	16	1057	32	1050	47	1044	20	100.133	100.667
223	91500-9	8552c_TRA_Data	13/11/2018 (3)	28.117	141	78.1	29.96	0.383611	28	151000	5392.86	1.829	0.044	0.1778	0.0058	0.44715	5.6243	0.059	0.07427	0.015	0.05162	0.022	1055	16	1054	32	1050	18	1017	34	99.9052	100.381
224	91500-10	8552c_TRA_Data	13/11/2018 (3)	28.106	142	80.3	29.99	0.373474	14	153600	10971.4	1.822	0.03	0.1782	0.0059	0.62833	5.61167	0.061	0.07381	0.015	0.05366	0.022	1052.4	16	1057	32	1037.8	19	1056	38	100.437	101.85
225	91500-12	8552c_TRA_Data	13/11/2018 (3)	28.128	142	80.2	29.98	0.373815	1	151900	151900	1.813	0.022	0.1765	0.0058	0.55721	5.66572	0.055	0.07413	0.015	0.0537	0.022	1049.4	16	1047.8	32	1046	22	1057	36	99.8475	100.172
226	91500-1	8553c_TRA_Data	13/11/2018 (3)	28.107	141	79	29.42	0.372405	37	151800	4102.7	1.835	0.04	0.178	0.0028	0.53261	5.61798	0.065	0.07478	0.0019	0.05389	0.013	1058.1	15	1056	15	1060	30	1061	24	99.8015	99.6226
227	91500-2	8553c_TRA_Data	13/11/2018 (3)	28.114	142	81.2	30.36	0.373892	21	156600	7457.14	1.851	0.041	0.1787	0.0026	0.635	5.59597	0.054	0.07499	0.0018	0.05352	0.013	1062.8	15	1059.3	14	1071	27	1054	24	99.6707	98.9076
228	91500-3	8553c_TRA_Data	13/11/2018 (3)	28.225	142	80.4	30.15	0.375	22	155600	7072.73	1.855	0.041	0.1795	0.0027	0.58898	5.57103	0.057	0.07477	0.0019	0.0542	0.013	1064	14	1064	15	1061	30	1067	24	100	100.283
229	91500-4	8553c_TRA_Data	13/11/2018 (3)	28.13	141	80.9	30.63	0.378616	37	157300	4251.35	1.858	0.041	0.1806	0.0027	0.47651	5.5371	0.056	0.07454	0.0019	0.05335	0.013	1066.5	15	1070.2	15	1060	30	1050	24	100.347	100.962
230	91500-5	8553c_TRA_Data	13/11/2018 (3)	28.11	142	79.3	29.9	0.377049	17	153400	9023.53	1.858	0.041	0.1795	0.0025	0.61699	5.57103	0.048	0.07492	0.0018	0.0538	0.013	1065.1	15	1064	14	1067	28	1059	24	99.8967	99.7188
231	91500-6	8553c_TRA_Data	13/11/2018 (3)	28.176	142	80.2	29.82	0.37182	30	151700	5056.67	1.841	0.041	0.1782	0.0027	0.51867	5.61167	0.056	0.07529	0.0019	0.05361	0.013	1059.1	15	1057	14	1074	31	1055	24	99.8017	98.4171
232	91500-7	8553c_TRA_Data	13/11/2018 (3)	28.117	142	79.3	29.61	0.373392	16	151000	9437.5	1.847	0.04	0.1788	0.0026	0.57266	5.59284	0.053	0.07517	0.0019	0.0539	0.013	1061.6	14	1060.4	14	1075	30	1061	24	99.887	98.6419
233	91500-8	8554c_TRA_Data	13/11/2018 (3)	28.119	142	80.8	30.17	0.373391	21	153600	7314.29	1.829	0.04	0.1783	0.0028	0.56633	5.60853	0.064	0.07438	0.0019	0.0539	0.013	1055	14	1058	16	1050	29	1062	24	100.284	100.762
234	91500-9	8554c_TRA_Data	13/11/2018 (3)	28.118	142	78.7	29.77	0.378272	19	151000	7947.37	1.873	0.04	0.1807	0.0027	0.52609	5.53403	0.058	0.07498	0.0019	0.05356	0.013	1071.8	15	1070.7	15	1067	29	1054	24	99.8974	100.347
235	91500-11	8554c_TRA_Data	13/11/2018 (3)	28.119	142	79.6	29.82	0.374623	19	150400	7915.79	1.844	0.04	0.1793	0.0028	0.52532	5.57724	0.063	0.0746	0.0019	0.05388	0.013	1060.3	14	1063	15	1053	29	1060	24	100.255	100.95
236	91500-12	8554c_TRA_Data	13/11/2018 (3)	28.118	141	80.8	30.38	0.37599	35	152900	4368.57	1.853	0.04	0.1788	0.0026	0.53555	5.59284	0.055	0.07515	0.0019	0.05362	0.013	1064.6	15	1060.4	14	1071	28	1055	24	99.6055	99.0103
237	91500-1	8555c_TRA_Data	13/11/2018 (3)	28.13	141	79.7	29.85	0.374529	19	153500	8078.95	1.868	0.078	0.1792	0.0065	0.63424	5.58036	0.059	0.07521	0.001	0.05343	0.0011	1070.9	26	1062	35	1071	16	1052	22	99.1689	99.1597
238	91500-3	8555c_TRA_Data	13/11/2018 (3)	28.111	141	81	30.6	0.377778	16	154900	9681.25	1.832	0.076	0.1794	0.0065	0.54192	5.57414	0.052	0.07439	0.0011	0.054	0.0012	1057.2	28	1063.4	35	1048	14	1063	23	100.586	101.469
239	91500-4	8555c_TRA_Data	13/11/2018 (3)	28.135	142	79.8	29.66	0.371679	13	150600	11584.6	1.843	0.077	0.1786	0.0065	0.64156	5.5991	0.059	0.07526	0.0011	0.05402	0.0011	1060.6	28	1059	35	1075	15	1063	22	99.8491	98.5116
240	91500-5	8555c_TRA_Data	13/11/2018 (3)	28.124	142	79.4	30.02	0.378086	9	152000	16888.9	1.854	0.077	0.1794	0.0065	0.5094	5.57414	0.055	0.07448	0.0011	0.0534	0.0012	1064.1	27	1063.5	35	1053	19	1051	22	99.9436	100.997
241	91500-6	8555c_TRA_Data	13/11/2018 (3)	28.114	141	78.5	29.69	0.378217	12	147100	12258.3	1.878	0.079	0.1793	0.0065	0.64803	5.57724	0.058	0.07523	0.0011	0.05396	0.0012	1073.1	28	1063	36	1076	20	1062	23	99.0588	98.7918
242	91500-7	8555c_TRA_Data	13/11/2018 (3)	28.129	141	81.5	30.15	0.369939	5	150600	30120	1.818	0.076	0.1791	0.0065	0.68616	5.58347	0.059	0.0747	0.001	0.05366	0.0012	1051	27	1062	35	1056	18	1056	23	101.047	100.568
243	91500-8	8556c_TRA_Data	13/11/2018 (3)	28.11	142	79.5	29.92	0.376352	6	150800	25133.3	1.876	0.079	0.1792	0.0066	0.67027	5.58036	0.063	0.07502	0.0011	0.05388	0.0012	1071.5	28	1062	36	1069	15	1061	23	99.1134	99.3452
244	91500-9	8556c_TRA_Data	13/11/2018 (3)	28.126	142	80.3	30.13	0.375218	23	152400	6626.09	1.854	0.077	0.1792	0.0065	0.57419	5.58036	0.058	0.07469	0.0011	0.05381	0.0012	1064.8	28	1062	35	1059	17	1059	23	99.737	100.283
245	91500-11	8556c_TRA_Data	13/11/2018 (3)	28.113	142	80.9	30.04	0.371323	30	151300	5043.33	1.814	0.076	0.1791	0.0066	0.59021	5.58347	0.061	0.07487	0.0011	0.05362	0.0012	1050.7	27	1062	36	1060	15	1055	23	101.075	100.189
246	91500-12	8556c_TRA_Data	13/11/2018 (3)	28.12	142	79.1	29.96	0.378761	50	150200	3004	1.872	0.078	0.1792	0.0065	0.54875	5.58036	0.056	0.07491	0.0011	0.05366	0.0012	1070.4	28	1062	35	1066	15	1056	23	99.2152	99.6248
247	91500-1	8557c_TRA_Data	13/11/2018 (3)	28.112	142	82.5	30.07	0.364485	48	155000	3229.17	1.847	0.049	0.1787	0.0043	0.61488	5.59597	0.055	0.07501	0.0011	0.05349	0.0012	1061.5	18	1059.7	23	1065	17	1053	22	99.8304	99.5023
248	91500-2	8557c_TRA_Data	13/11/2018 (3)	28.12	141	81.5	30.47	0.373865	13	153700	11823.1	1.858	0.05	0.1797	0.0043	0.55488	5.56483	0.056	0.07494	0.0012	0.0532	0.0012	1066.3	17	1064.9	23	1063	19	1048	23	99.8687	100.179
249	91500-3	8557c_TRA_Data	13/11/2018 (3)	28.114	141	79.2	29.6	0.373737	11	148800	13527.3	1.849	0.051	0.1789	0.0044	0.66252	5.58971	0.065	0.075	0.0012	0.05408	0.0012	1061.8	18	1061	24	1067	17	1064	23	99.9247	99.4377
250	91500-4	8557c_TRA_Data	13/11/2018 (3)	28.201	142	78.4	29.75	0.379464	18	146800	8155.56	1.844	0.05	0.1787	0.0043	0.59043	5.59597	0.062	0.07501	0.0012	0.0531	0.0013	1059.9	18	1059	24	1066	19	1045	24	99.9151	99.3433
251	91500-5	8557c_TRA_Data	13/11/2018 (3)	28.121	142	78.9	30.04	0.380735	14	148400	10600	1.843	0.051	0.18	0.0044	0.68192	5.55556	0.063	0.07429	0.0011	0.0544	0.0013	1059.7	18	1067	24	1047	18	1071	24	100.689	101.91
252	91500-6	8557c_TRA_Data	13/11/2018 (3)	28.129	142	77.1	29.84	0.38703	31	144600	4664.52	1.888	0.05	0.1815	0.0044	0.64304	5.50964	0.058	0.07556	0.0011	0.05405	0.0011	1076	18	1075	24	1082	18	1064	22	99.9071	99.353
253	91500-7	8557c_TRA_Data	13/11/2018 (3)	28.116	142	80.8	30.21	0.373886	17	148300	8723.53	1.812	0.049	0.1767	0.0042	0.58966	5.65931	0.055	0.07434	0.0011	0.05406	0.0011	1048.9	18	1048.8	23	1049	17	1066	21	99.9905	99.9809
254	91500-8	8558c_TRA_Data	13/11/2018 (3)	28.204	142	80	29.7	0.37125	36	148500	4125	1.855	0.051	0.1814	0.0044	0.58545	5.51268	0.06	0.07406	0.0012	0.0538	0.0012	1063.9	18	1075	24	1043	19	1059	23	101.043	103.068
255	91500-9	8558c_TRA_Data	13/11/2018 (3)	28.224	142	82	30.23	0.368659	55	150000	2727.27	1.852	0.05	0.1785	0.0044	0.70161	5.60224	0.064	0.07528	0.0011	0.0531	0.0012	1063	18	1058	24	1072	19	1046	23	99.5296	98.694
256	91500-10	8558c_TRA_Data	13/11/2018 (3)	28.131	141	82.1	30.23	0.36821	14	147000	10500	1.826	0.048	0.1766	0.0043	0.61439	5.66251	0.062	0.07497	0.0012	0.05414	0.0011	1053.8	17	1048	24	1064	17	1065	21	99.4496	98.4962
257	91500-11	8558c_TRA_Data	13/11/2018 (3)	28.126	142	78.3	29.66	0.378799	9	143200	15911.1	1.86	0.05	0.1807	0.0044	0.56129	5.53403	0.061	0.07454	0.0012	0.05368	0.0012	1065.9	18	1070	24	1055	20	1056	23	100.385	101.422
258	91500-12	8558c_TRA_Data	13/11/2018 (3)	28.12	142	79	30.1	0.381013	20	143000	7150	1.862	0.05	0.1795	0.0043	0.55548	5.57103	0.061	0.07519	0.0012	0.0532	0.0012	1067.6	18	1064	24	1072	19	1048	24	99.6628	99.2537
259	91500-1	8559c_TRA_Data	13/11/2018 (3)	28.108	142	78.9	29.61	0.375285	17	137600	8094.12	1.837	0.029	0.1779	0.0035	0.56052	5.62113	0.052	0.0751	0.0012	0.05338	0.0022	1057.6	10	1056.4	18	1069	17	1051	43	99.8865	98.8213
260	91500-2	8559c_TRA_Data	13/11/2018 (3)	28.112	142	79.4	30.13	0.379471	33	141400	4284.85	1.864	0.03	0.182	0.0036	0.62602	5.49451	0.057	0.07439	0.0011	0.0547	0.0023	1067.4	10	1077	20	1052	15	1076	44	100.899	102.376
261	91500-3	8559c_TRA_Data	13/11/2018 (3)	28.118	142	81.3	30.82	0.37909	37	142600	3854.05	1.864	0.029	0.1791	0.0035	0.50243	5.58347	0.052	0.07546	0.0012	0.05307	0.0022	1067.4	10	1061.7	19	1079	19	1045	42	99.466	98.3967
262	91500-4	8559c_TRA_Data	13/11/2018 (3)	28.113	142	81.8	30.39	0.371516	34	143600	4223.53	1.837	0.028	0.1792	0.0035	0.55465	5.58036	0.051	0.07425	0.0011	0.05395	0.0023	1058.1	10	1062.1	19	1047	16	1062	43	100.378	101.442
263	91500-5	8559c_TRA_Data	13/11/2018 (3)	28.131	142	78.8	29.54	0.374873	50	138000	2760	1.858	0.03	0.1782	0.0036	0.59383	5.61167	0.059	0.0757	0.0011	0.0538	0.0023	1065.1	11	1057	20	1089	16	1059	44	99.2395	97.0615
264	91500-6	8559c_TRA_Data	13/11/2018 (3)	28.132	142	78.4	28.96	0.369388	5	139300	27860	1.859	0.032	0.1808	0.0036	0.60761	5.53097	0.061	0.07464	0.0012	0.05436	0.0023	1065.5	11	1071	20	1058	18	1070	44	100.516	101.229
265	91500-7	8559c_TRA_Data	13/11/2018 (3)	28.118	142	80.7	30.03	0.372119	1	141600	141600	1.832	0.031	0.1779	0.0037	0.6655	5.62113	0.067	0.07472	0.0011	0.05366	0.0023	1056.8	12	1055	20	1062	17	1056	43	99.8297	99.3409
266	91500-8	8560c_TRA_Data	13/11/2018 (3)	28.132	141	78.8	29.51	0.374492	31	138900	4480.65	1.849	0.029	0.1797	0.0036	0.43037	5.56483	0.057	0.07461	0.0012	0.05293	0.0022	1062.3	10	1065	20	1059	19	1042	43	100.254	100.567
267	91500-9	8560c_TRA_Data	13/11/2018 (3)	28.126	140	83.3	30.84	0.370228	11	146000	13272.7	1.835	0.029	0.1771	0.0035	0.52526	5.64653	0.061	0.07503	0.0011	0.05409	0.0023	1057.2	10	1051	19	1072	17	1064	43	99.4135	98.041
268	91500-10	8560c_TRA_Data	13/11/2018 (3)	28.109	142	80.2	30.32	0.378055	12	143300	11941.7	1.861	0.031	0.1804	0.0037	0.54035	5.54324	0.062	0.07501	0.0012	0.05329	0.0022	1066.3	11	1069	20	1067	17	1049	43	100.253	100.187
269	91500-11	8560c_TRA_Data	13/11/2018 (3)	28.136	141	80.9	30.3	0.374536	39	142600	3656.41	1.843	0.028	0.1781	0.0035	0.55428	5.61482	0.056	0.07514	0.0011	0.0546	0.0023	1061.1	10	1057.8	20	1072	17	1074	44	99.689	98.6754
270	91500-12	8560c_TRA_Data	13/11/2018 (3)	28.108	142	77.7	29.5	0.379665	7	138500	19785.7	1.861	0.03	0.1807	0.0037	0.5858	5.53403	0.062	0.07466	0.0012	0.0535	0.0023	1066.5	11	1070	20	1061	17	1053	44	100.328	100.848
271	91500-1	8561c_TRA_Data	13/11/2018 (3)	28.112	142	79.9	29.7	0.371715	32	137500	4296.88	1.822	0.045	0.1787	0.003	0.6015	5.59597	0.061	0.07481	0.0017	0.05445	0.0014	1052	16	1060	16	1062	24	1071	27	100.76	99.8117
272	91500-2	8561c_TRA_Data	13/11/2018 (3)	28.106	141	79.5	30.2	0.379874	11	138200	12563.6	1.857	0.043	0.1803	0.0029	0.52929	5.54631	0.054	0.07527	0.0017	0.05332	0.0014	1065.1	15	1068.2	16	1075	26	1050	27	100.291	99.3674
273	91500-3	8561c_TRA_Data	13/11/2018 (3)	28.113	141	81.7	30.21	0.369767	6	141400	23566.7	1.834	0.044	0.1776	0.003	0.58432	5.63063	0.062	0.07503	0.0017	0.05373	0.0015	1057.6	16	1053	16	1070	25	1058	28	99.5651	98.4112
274	91500-4	8561c_TRA_Data	13/11/2018 (3)	28.115	141	80.4	30.27	0.376493	5	141600	28320	1.861	0.045	0.18	0.0029	0.65076	5.55556	0.057	0.07462	0.0017	0.05338	0.0014	1066.4	16	1068	16	1058	25	1051	26	100.15	100.945
275	91500-5	8561c_TRA_Data	13/11/2018 (3)	28.116	141	79.5	29.69	0.373459	20	139800	6990	1.852	0.045	0.179	0.003	0.67855	5.58659	0.06	0.0747	0.0017	0.05365	0.0014	1063.1	16	1061	16	1059.2	25	1056	27	99.8025	100.17
276	91500-6	8561c_TRA_Data	13/11/2018 (3)	28.111	142	80.3	30.05	0.374222	22	141900	6450	1.871	0.046	0.179	0.0029	0.61162	5.58659	0.059	0.07536	0.0017	0.05437	0.0014	1069.6	16	1061	16	1076	28	1070	27	99.196	98.6059
277	91500-7	8561c_TRA_Data	13/11/2018 (3)	28.127	142	78.7	29.89	0.379797	10	139800	13980	1.853	0.046	0.1793	0.0029	0.61683	5.57724	0.056	0.07439	0.0017	0.05333	0.0014	1064.5	16	1062.9	16	1052	27	1050	27	99.8497	101.036
278	91500-8	8562c_TRA_Data	14/11/2018 (4)	28.12	141	79.6	30.05	0.377513	2	141900	70950	1.853	0.045	0.1792	0.003	0.59706	5.58036	0.062	0.07455	0.0017	0.05431	0.0015	1063.4	16	1062	16	1055	26	1069	28	99.8683	100.664
279	91500-9	8562c_TRA_Data	14/11/2018 (4)	28.121	142	79.3	29.99	0.378184	44	141100	3206.82	1.868	0.046	0.1792	0.003	0.584	5.58036	0.061	0.07543	0.0017	0.0531	0.0015	1068.5	16	1062	16	1078	29	1044	28	99.3917	98.5158
280	91500-10	8562c_TRA_Data	14/11/2018 (4)	28.136	142	81.3	30.15	0.370849	10	143000	14300	1.845	0.046	0.179	0.003	0.56541	5.58659	0.061	0.07569	0.0018	0.0534	0.0015	1060.4	16	1061	16	1084	27	1051	28	100.057	97.8782
281	91500-11	8562c_TRA_Data	14/11/2018 (4)	28.128	141	80.3	29.79	0.370984	11	142300	12936.4	1.811	0.044	0.1791	0.0029	0.57992	5.58347	0.06	0.07357	0.0017	0.0538	0.0015	1048.3	16	1062	16	1031	28	1059	29	101.307	103.007
282	91500-12	8562c_TRA_Data	14/11/2018 (4)	28.121	142	79.5	30.09	0.378491	4	142000	35500	1.869	0.045	0.1794	0.003	0.68161	5.57414	0.063	0.07543	0.0017	0.05396	0.0014	1069	16	1063	17	1078	28	1062	27	99.4387	98.6085
283	91500-1	8563c_TRA_Data	14/11/2018 (4)	28.114	142	79.9	29.88	0.373967	15	140400	9360	1.859	0.044	0.1781	0.0039	0.52263	5.61482	0.061	0.07567	0.00099	0.05349	0.0011	1065.6	15	1056	21	1084	16	1053	20	99.0991	97.417
284	91500-2	8563c_TRA_Data	14/11/2018 (4)	28.118	142	80.6	30.28	0.375682	13	142700	10976.9	1.83	0.042	0.1792	0.0039	0.54181	5.58036	0.059	0.07424	0.00093	0.05382	0.0011	1055.3	15	1062	21	1042	14	1059	21	100.635	101.919
285	91500-3	8563c_TRA_Data	14/11/2018 (4)	28.119	142	79.7	29.88	0.374906	1	141100	141100	1.858	0.043	0.1786	0.0038	0.56316	5.5991	0.059	0.07527	0.00094	0.0535	0.0012	1066.2	16	1058.9	21	1070	14	1052	22	99.3153	98.9626
286	91500-4	8563c_TRA_Data	14/11/2018 (4)	28.112	142	80.4	29.96	0.372637	13	142000	10923.1	1.852	0.042	0.1788	0.0039	0.51008	5.59284	0.055	0.07528	0.00094	0.054	0.0012	1064.1	15	1060.4	21	1074	17	1063	22	99.6523	98.7337
287	91500-5	8563c_TRA_Data	14/11/2018 (4)	28.119	141	78.6	30.01	0.381807	43	140900	3276.74	1.865	0.043	0.1816	0.0039	0.60366	5.50661	0.058	0.07427	0.00088	0.05333	0.001	1067.6	15	1075	21	1050	16	1050	20	100.693	102.381
288	91500-6	8563c_TRA_Data	14/11/2018 (4)	28.123	142	80.3	30.15	0.375467	18	142800	7933.33	1.856	0.043	0.1805	0.0039	0.57617	5.54017	0.057	0.07446	0.00092	0.05387	0.00097	1064.5	15	1069.6	21	1052	14	1060	19	100.479	101.673
289	91500-7	8563c_TRA_Data	14/11/2018 (4)	28.124	142	81.2	29.86	0.367734	23	143200	6226.09	1.84	0.043	0.1787	0.0039	0.56599	5.59597	0.06	0.07499	0.00097	0.055	0.0012	1058.8	15	1060	21	1067	14	1081	23	100.113	99.344
290	91500-8	8564c_TRA_Data	14/11/2018 (4)	28.12	142	80.9	30.04	0.371323	5	140000	28000	1.812	0.042	0.1755	0.0038	0.57857	5.69801	0.06	0.07498	0.00092	0.0536	0.0011	1049.8	16	1042	21	1065	14	1054	22	99.257	97.8404
291	91500-9	8564c_TRA_Data	14/11/2018 (4)	28.117	142	78.6	29.97	0.381298	25	139100	5564	1.869	0.043	0.1807	0.0039	0.59503	5.53403	0.056	0.07502	0.00087	0.05361	0.0011	1069.2	15	1071	21	1072	14	1055	21	100.168	99.9067
292	91500-10	8564c_TRA_Data	14/11/2018 (4)	28.112	141	79.7	29.98	0.376161	6	140200	23366.7	1.845	0.043	0.1785	0.0038	0.59172	5.60224	0.057	0.07481	0.00089	0.05353	0.001	1060.6	15	1058.6	21	1063	13	1054	19	99.8114	99.5861
293	91500-11	8564c_TRA_Data	14/11/2018 (4)	28.123	142	79.6	29.95	0.376256	7	140900	20128.6	1.86	0.043	0.1796	0.0039	0.60141	5.56793	0.056	0.07509	0.00087	0.05367	0.00098	1066.1	15	1064.3	21	1067	15	1056	19	99.8312	99.747
294	91500-12	8564c_TRA_Data	14/11/2018 (4)	28.128	141	80.5	30.08	0.373665	5	142600	28520	1.861	0.045	0.1803	0.0039	0.64058	5.54631	0.056	0.07469	0.00092	0.05385	0.001	1066	16	1068.1	21	1063	13	1060	20	100.197	100.48
295	91500-1	8565c_TRA_Data	14/11/2018 (4)	28.114	142	79.8	30.01	0.376065	66	141500	2143.94	1.861	0.039	0.1809	0.0032	0.5874	5.52792	0.059	0.07443	0.0011	0.05361	0.0017	1066.3	14	1072	17	1055	17	1055	32	100.535	101.611
296	91500-2	8565c_TRA_Data	14/11/2018 (4)	28.12	141	80	30.02	0.37525	22	139800	6354.55	1.853	0.037	0.1781	0.003	0.61879	5.61482	0.053	0.0757	0.0011	0.054	0.0018	1065.7	14	1056.2	16	1089	16	1063	34	99.1086	96.9881
297	91500-3	8565c_TRA_Data	14/11/2018 (4)	28.12	141	80.5	29.88	0.37118	16	140600	8787.5	1.842	0.039	0.1791	0.0031	0.48105	5.58347	0.056	0.07464	0.0012	0.05419	0.0018	1059.6	14	1061.7	17	1061	17	1066	34	100.198	100.066
298	91500-4	8565c_TRA_Data	14/11/2018 (4)	28.123	141	80.3	30.11	0.374969	6	139400	23233.3	1.831	0.038	0.1785	0.0031	0.54084	5.60224	0.054	0.07446	0.0011	0.05299	0.0017	1055.8	14	1058.4	17	1053	16	1043	33	100.246	100.513
299	91500-5	8565c_TRA_Data	14/11/2018 (4)	28.126	141	79.2	29.98	0.378535	21	137900	6566.67	1.858	0.039	0.1796	0.0031	0.64231	5.56793	0.056	0.07513	0.0011	0.05394	0.0017	1065.3	14	1064.5	17	1070	18	1062	33	99.9249	99.486
300	91500-6	8565c_TRA_Data	14/11/2018 (4)	28.131	142	79.9	29.93	0.374593	13	143300	11023.1	1.839	0.04	0.1792	0.0032	0.62706	5.58036	0.064	0.0743	0.0011	0.0541	0.0019	1058.3	14	1062	18	1051	19	1064	36	100.35	101.047
301	91500-7	8565c_TRA_Data	14/11/2018 (4)	28.131	142	80.2	30.06	0.374813	26	144400	5553.85	1.858	0.039	0.1791	0.0032	0.60523	5.58347	0.061	0.07544	0.0011	0.05352	0.0018	1066.3	14	1062	17	1077	16	1053	34	99.5967	98.6072
302	91500-8	8566c_TRA_Data	14/11/2018 (4)	28.206	143	80.3	30.08	0.374595	28	142500	5089.29	1.862	0.039	0.1795	0.0032	0.6695	5.57103	0.063	0.07458	0.0011	0.05363	0.0017	1066.4	14	1064	17	1056	18	1056	33	99.7749	100.758
303	91500-9	8566c_TRA_Data	14/11/2018 (4)	28.137	142	79.7	29.93	0.375533	49	139800	2853.06	1.849	0.039	0.1791	0.0032	0.57486	5.58347	0.059	0.07474	0.0011	0.05389	0.0018	1062	14	1062	17	1060	18	1061	34	100	100.189
304	91500-10	8566c_TRA_Data	14/11/2018 (4)	28.126	142	79.6	29.87	0.375251	29	139600	4813.79	1.857	0.04	0.1802	0.0032	0.61417	5.54939	0.059	0.07497	0.0011	0.0537	0.0018	1064.8	14	1068	17	1068	17	1057	34	100.301	100
305	91500-11	8566c_TRA_Data	14/11/2018 (4)	28.117	142	80.5	30.14	0.37441	4	140100	35025	1.834	0.037	0.1777	0.0031	0.5341	5.62746	0.058	0.07504	0.0011	0.05362	0.0018	1057.8	14	1054	17	1067	17	1055	34	99.6408	98.7816
306	91500-12	8566c_TRA_Data	14/11/2018 (4)	28.126	142	79.9	29.98	0.375219	12	141700	11808.3	1.856	0.039	0.1796	0.0032	0.54368	5.56793	0.059	0.07494	0.0011	0.0539	0.0018	1065.6	14	1065	17	1069	15	1060	35	99.9437	99.6258
307	91500-1	8567c_TRA_Data	14/11/2018 (4)	28.136	142	79.6	29.9	0.375628	11	149600	13600	1.862	0.045	0.1805	0.005	0.59574	5.54017	0.054	0.07488	0.0007	0.0537	0.0012	1066.8	16	1069.7	27	1064	13	1057	23	100.272	100.536
308	91500-2	8567c_TRA_Data	14/11/2018 (4)	28.115	142	81	30.17	0.372469	13	154200	11861.5	1.833	0.045	0.1773	0.0049	0.63973	5.64016	0.062	0.07483	0.00072	0.05354	0.0012	1058.7	16	1052	27	1068	13	1054	23	99.3671	98.5019
309	91500-3	8567c_TRA_Data	14/11/2018 (4)	28.117	142	79.3	29.9	0.377049	18	151700	8427.78	1.836	0.045	0.1785	0.0049	0.61948	5.60224	0.052	0.0746	0.00068	0.05299	0.0011	1057.4	16	1058.7	27	1057	11	1043	22	100.123	100.161
310	91500-4	8567c_TRA_Data	14/11/2018 (4)	28.138	142	80.3	30.11	0.374969	33	153000	4636.36	1.859	0.046	0.1803	0.005	0.68652	5.54631	0.059	0.07469	0.0007	0.05387	0.0011	1065.4	16	1068	27	1060	10	1060	21	100.244	100.755
311	91500-5	8567c_TRA_Data	14/11/2018 (4)	28.113	142	79.8	29.91	0.374812	4	146600	36650	1.86	0.047	0.1785	0.0049	0.64681	5.60224	0.059	0.0756	0.00076	0.054	0.0012	1065.9	17	1059	27	1083	11	1064	24	99.3527	97.7839
312	91500-6	8567c_TRA_Data	14/11/2018 (4)	28.12	142	80.1	30.03	0.374906	3	147900	49300	1.856	0.046	0.1799	0.005	0.64069	5.55864	0.057	0.07489	0.0007	0.05471	0.0011	1064.5	16	1066	27	1060.2	9.9	1076	21	100.141	100.547
313	91500-7	8567c_TRA_Data	14/11/2018 (4)	28.13	142	79.9	29.98	0.375219	1	147300	147300	1.852	0.047	0.1801	0.005	0.59019	5.55247	0.062	0.07463	0.00087	0.05339	0.0012	1062.9	16	1067	27	1057	14	1051	22	100.386	100.946
314	91500-8	8568c_TRA_Data	14/11/2018 (4)	28.113	142	80	30.04	0.3755	13	152200	11707.7	1.88	0.046	0.1814	0.005	0.58719	5.51268	0.055	0.07496	0.00071	0.05357	0.0012	1073.1	16	1074.6	27	1066.4	8.4	1055	23	100.14	100.769
315	91500-9	8568c_TRA_Data	14/11/2018 (4)	28.106	142	80.1	29.94	0.373783	40	149300	3732.5	1.809	0.044	0.175	0.0049	0.61612	5.71429	0.064	0.07493	0.00076	0.05402	0.0012	1048.8	17	1039	27	1067	11	1063	23	99.0656	97.3758
316	91500-10	8568c_TRA_Data	14/11/2018 (4)	28.117	142	80.1	30.03	0.374906	15	148700	9913.33	1.85	0.046	0.1787	0.005	0.55858	5.59597	0.062	0.07505	0.00081	0.0535	0.0012	1062.1	16	1059	27	1063	14	1054	24	99.7081	99.6237
317	91500-11	8568c_TRA_Data	14/11/2018 (4)	28.128	142	79.9	29.97	0.375094	25	150000	6000	1.855	0.046	0.1801	0.005	0.58996	5.55247	0.056	0.07479	0.00078	0.0541	0.0012	1065	17	1067	27	1061	12	1065	23	100.188	100.566
318	91500-12	8568c_TRA_Data	14/11/2018 (4)	28.11	142	80.1	30.03	0.374906	26	152400	5861.54	1.85	0.046	0.1792	0.005	0.56965	5.58036	0.059	0.07475	0.0008	0.05314	0.0012	1062.3	16	1062	27	1062	12	1046	23	99.9718	100
319	91500-1	8506c_TRA_Data	06/11/2018 (3)	25.493	129	80.1	29.94	0.373783	19	168600	8873.68	1.833	0.029	0.1783	0.0024	0.54865	5.60853	0.063	0.07471	0.0013	0.05315	0.0011	1055.9	10	1057	13	1061	20	1047	20	100.104	99.623
320	91500-2	8506c_TRA_Data	06/11/2018 (3)	26.491	134	80.6	30.15	0.374069	6	171500	28583.3	1.866	0.029	0.1795	0.0022	0.51353	5.57103	0.057	0.07557	0.0012	0.0535	0.0011	1068	10	1064	12	1079	18	1054	22	99.6255	98.6098
321	91500-3	8506c_TRA_Data	06/11/2018 (3)	26.939	136	79.6	30.02	0.377136	45	169800	3773.33	1.855	0.028	0.1789	0.0023	0.59389	5.58971	0.058	0.07521	0.0012	0.05432	0.0011	1064.1	9.9	1061	12	1071	18	1069	20	99.7087	99.0663
322	91500-4	8506c_TRA_Data	06/11/2018 (3)	25.925	131	78.9	29.87	0.37858	28	168700	6025	1.837	0.026	0.1786	0.0022	0.54899	5.5991	0.056	0.07464	0.0011	0.05372	0.0011	1058.8	9.5	1059.1	12	1060	19	1057	20	100.028	99.9151
323	91500-5	8506c_TRA_Data	06/11/2018 (3)	25.825	130	79.4	30.05	0.378463	45	171300	3806.67	1.853	0.029	0.1802	0.0024	0.49483	5.54939	0.06	0.07453	0.0012	0.0542	0.0011	1063.4	10	1068	13	1053	21	1066	21	100.433	101.425
324	91500-6	8506c_TRA_Data	06/11/2018 (3)	25.738	130	80.8	29.98	0.37104	21	183500	8738.1	1.837	0.028	0.1793	0.0024	0.56891	5.57724	0.061	0.07421	0.0011	0.05343	0.001	1057.6	10	1063	13	1049	18	1052	20	100.511	101.335
325	91500-7	8506c_TRA_Data	06/11/2018 (3)	25.932	131	83	30.05	0.362048	8	189900	23737.5	1.868	0.025	0.1796	0.0022	0.55228	5.56793	0.055	0.07545	0.0012	0.05389	0.001	1070	8.8	1064.3	12	1078	20	1061	20	99.4673	98.7291
326	91500-8	8507c_TRA_Data	06/11/2018 (3)	25.778	129	80.4	30.08	0.374129	40	185300	4632.5	1.845	0.027	0.1792	0.0023	0.59927	5.58036	0.059	0.07461	0.0011	0.05326	0.00097	1060.5	9.7	1062	12	1064	19	1049	19	100.141	99.812
327	91500-9	8507c_TRA_Data	06/11/2018 (3)	25.087	126	76.2	29.85	0.391732	49	175200	3575.51	1.855	0.027	0.1798	0.0022	0.42845	5.56173	0.056	0.07475	0.0012	0.05429	0.001	1064.4	9.5	1065	12	1064	17	1068	20	100.056	100.094
328	91500-10	8507c_TRA_Data	06/11/2018 (3)	25.708	129	84.5	30.16	0.356923	8	197100	24637.5	1.849	0.027	0.1796	0.0023	0.48511	5.56793	0.056	0.07487	0.0012	0.05355	0.00099	1063	9.8	1064	13	1065	18	1054	19	100.094	99.9061
329	91500-11	8507c_TRA_Data	06/11/2018 (3)	26.344	133	79.8	29.77	0.373058	5	185000	37000	1.839	0.025	0.1773	0.002	0.48796	5.64016	0.05	0.07542	0.0011	0.05385	0.00095	1059.5	8.7	1051.8	11	1079	16	1060	18	99.2732	97.4791
330	91500-12	8507c_TRA_Data	06/11/2018 (3)	25.314	128	77.8	30.06	0.386375	29	184300	6355.17	1.861	0.029	0.1808	0.0023	0.57592	5.53097	0.058	0.07463	0.0011	0.05381	0.0011	1066.1	10	1071	13	1063	18	1059	21	100.46	100.753
331	91500-1	8572c_TRA_Data	16/11/2018 (6)	28.128	142	79.4	29.71	0.374181	1	234200	234200	1.861	0.035	0.1801	0.0044	0.60867	5.55247	0.046	0.07508	0.00088	0.05441	0.0014	1066.9	12	1067.1	24	1069.9	13	1071	27	100.019	99.7383
332	91500-2	8572c_TRA_Data	16/11/2018 (6)	28.154	142	81.8	30.42	0.371883	24	238900	9954.17	1.818	0.035	0.1769	0.0043	0.57972	5.65291	0.05	0.07444	0.00091	0.05251	0.0014	1051	13	1049.9	24	1053	14	1034	28	99.8953	99.7056
333	91500-3	8572c_TRA_Data	16/11/2018 (6)	28.12	142	78.8	29.84	0.37868	6	233600	38933.3	1.864	0.035	0.1796	0.0044	0.57349	5.56793	0.047	0.07531	0.00089	0.05349	0.0014	1067.7	12	1064.9	24	1076	14	1053	27	99.7378	98.9684
334	91500-4	8572c_TRA_Data	16/11/2018 (6)	28.132	141	79.3	29.89	0.376923	26	234800	9030.77	1.845	0.036	0.1797	0.0044	0.6339	5.56483	0.05	0.07446	0.00088	0.05396	0.0015	1060.9	13	1065.2	24	1052.8	13	1062	29	100.405	101.178
335	91500-5	8572c_TRA_Data	16/11/2018 (6)	28.178	142	80.1	29.91	0.373408	32	239000	7468.75	1.857	0.036	0.1795	0.0044	0.64838	5.57103	0.055	0.07524	0.00084	0.05372	0.0014	1066.1	12	1063.8	24	1074.5	12	1057	28	99.7843	99.0042
336	91500-6	8572c_TRA_Data	16/11/2018 (6)	28.12	142	80.7	30.4	0.376704	37	242700	6559.46	1.856	0.036	0.1795	0.0044	0.62896	5.57103	0.05	0.07493	0.00091	0.0534	0.0014	1064.8	13	1064	24	1065	16	1051	27	99.9249	99.9061
337	91500-7	8572c_TRA_Data	16/11/2018 (6)	28.173	142	81.4	30.44	0.373956	45	245600	5457.78	1.845	0.035	0.1797	0.0044	0.64551	5.56483	0.052	0.07456	0.00088	0.05467	0.0014	1060.9	13	1064.9	24	1053	14	1076	27	100.377	101.13
338	91500-8	8573c_TRA_Data	16/11/2018 (6)	28.162	142	79.2	29.16	0.368182	3	235400	78466.7	1.849	0.036	0.1782	0.0043	0.61706	5.61167	0.049	0.07494	0.00092	0.05405	0.0014	1062.2	13	1056.8	24	1067	14	1064	27	99.4916	99.044
339	91500-9	8573c_TRA_Data	16/11/2018 (6)	28.232	143	81.5	30.7	0.376687	20	244600	12230	1.848	0.035	0.1795	0.0044	0.6816	5.57103	0.052	0.07457	0.00087	0.05364	0.0014	1062.8	13	1063.9	24	1056	14	1056	28	100.104	100.748
340	91500-10	8573c_TRA_Data	16/11/2018 (6)	28.125	142	81.6	31.29	0.383456	27	243300	9011.11	1.854	0.036	0.1801	0.0044	0.55821	5.55247	0.052	0.07477	0.00095	0.05315	0.0014	1064	13	1067.4	24	1061	15	1046	27	100.32	100.603
341	91500-11	8573c_TRA_Data	16/11/2018 (6)	28.113	142	79.2	29.32	0.370202	10	233800	23380	1.85	0.035	0.1786	0.0043	0.69359	5.5991	0.048	0.07522	0.00084	0.05395	0.0015	1062.8	13	1059.4	24	1073.4	12	1062	28	99.6801	98.6957
342	91500-12	8573c_TRA_Data	16/11/2018 (6)	28.224	143	78.3	29.53	0.377139	36	232200	6450	1.847	0.036	0.1791	0.0044	0.63646	5.58347	0.056	0.07482	0.00091	0.05372	0.0014	1061.5	13	1062.1	24	1062.5	14	1057	28	100.057	99.9624
343	91500-1	8508c_TRA_Data	06/11/2018 (3)	26.338	132	80.1	29.94	0.373783	32	172600	5393.75	1.84	0.046	0.1781	0.0054	0.57277	5.61482	0.051	0.0748	0.0012	0.0543	0.00089	1058.9	17	1056.6	30	1061	20	1068	17	99.7828	99.5853
344	91500-2	8508c_TRA_Data	06/11/2018 (3)	25.973	131	80.7	29.97	0.371375	49	173800	3546.94	1.824	0.046	0.177	0.0055	0.64832	5.64972	0.064	0.07479	0.0011	0.05364	0.00092	1053.2	17	1050	30	1060	20	1056	18	99.6962	99.0566
345	91500-3	8508c_TRA_Data	06/11/2018 (3)	25.814	130	78.6	29.97	0.381298	39	174300	4469.23	1.852	0.046	0.1809	0.0055	0.53594	5.52792	0.053	0.07418	0.0012	0.05333	0.00096	1063.4	16	1071.8	30	1046	17	1050	18	100.79	102.467
346	91500-4	8508c_TRA_Data	06/11/2018 (3)	26.142	132	79.4	29.68	0.373804	49	174900	3569.39	1.863	0.047	0.1805	0.0055	0.59263	5.54017	0.057	0.07499	0.0012	0.05363	0.00096	1066.9	17	1069.4	30	1067	17	1056	18	100.234	100.225
347	91500-5	8508c_TRA_Data	06/11/2018 (3)	25.749	130	81.1	30.07	0.370777	44	177200	4027.27	1.859	0.046	0.1784	0.0054	0.52504	5.60538	0.051	0.07555	0.0012	0.05377	0.0009	1065.9	16	1058.2	30	1079	19	1058	17	99.2776	98.0723
348	91500-6	8508c_TRA_Data	06/11/2018 (3)	25.983	130	79.4	30.06	0.378589	2	178700	89350	1.848	0.047	0.1781	0.0055	0.6455	5.61482	0.056	0.07511	0.0012	0.05372	0.00098	1061.6	17	1056.6	30	1068	17	1057	19	99.529	98.9326
349	91500-7	8508c_TRA_Data	06/11/2018 (3)	18.133	92	80.8	31.74	0.392822	4	187700	46925	1.861	0.047	0.1822	0.0057	0.50438	5.48847	0.069	0.07459	0.0013	0.0539	0.001	1066.5	17	1079	31	1056	19	1060	20	101.172	102.178
350	91500-8	8509c_TRA_Data	06/11/2018 (3)	23.044	116	82.7	30.82	0.372672	7	180000	25714.3	1.823	0.048	0.177	0.0056	0.72162	5.64972	0.07	0.07491	0.0012	0.05311	0.00078	1052.6	17	1050	30	1065	18	1046	15	99.753	98.5915
351	91500-9	8509c_TRA_Data	06/11/2018 (3)	25.054	126	76.6	27.93	0.364621	30	169200	5640	1.883	0.047	0.1818	0.0056	0.70724	5.50055	0.056	0.07501	0.0011	0.05433	0.00087	1074.4	17	1077	30	1069.4	16	1069	17	100.242	100.711
352	91500-10	8509c_TRA_Data	06/11/2018 (3)	24.818	125	81.6	31.54	0.38652	9	184800	20533.3	1.868	0.047	0.1811	0.0055	0.58688	5.52181	0.053	0.07497	0.0012	0.0532	0.00093	1069	17	1073	30	1066	17	1047	18	100.374	100.657
353	91500-11	8509c_TRA_Data	06/11/2018 (3)	28.053	142	79.9	29.7	0.371715	50	176600	3532	1.839	0.046	0.1763	0.0054	0.62113	5.67215	0.06	0.07522	0.0011	0.05372	0.00098	1058.3	16	1046	30	1072.3	16	1057	19	98.8378	97.5473
354	91500-12	8509c_TRA_Data	06/11/2018 (3)	25.834	130	79.4	29.9	0.376574	19	178300	9384.21	1.83	0.046	0.1788	0.0055	0.675	5.59284	0.059	0.07428	0.0011	0.05426	0.00083	1055.2	16	1060	30	1048	18	1068	16	100.455	101.145
355	91500-1	8574c_TRA_Data	16/11/2018 (6)	28.128	142	79.7	29.93	0.375533	8	225600	28200	1.845	0.036	0.179	0.0034	0.49931	5.58659	0.047	0.07489	0.0011	0.05354	0.0011	1061	13	1061	18	1064	17	1054	20	100	99.718
356	91500-2	8574c_TRA_Data	16/11/2018 (6)	28.116	141	80.1	29.98	0.374282	3	228500	76166.7	1.852	0.036	0.1797	0.0034	0.57406	5.56483	0.051	0.07494	0.001	0.05433	0.0011	1063.5	13	1064.9	19	1063	17	1069	20	100.132	100.179
357	91500-3	8574c_TRA_Data	16/11/2018 (6)	28.131	142	79.9	29.82	0.373217	33	230300	6978.79	1.848	0.036	0.1788	0.0033	0.55878	5.59284	0.045	0.07476	0.001	0.05343	0.001	1062	13	1060.3	18	1064.1	16	1052	19	99.8399	99.6429
358	91500-4	8574c_TRA_Data	16/11/2018 (6)	28.133	142	79.8	30.2	0.378446	22	233100	10595.5	1.87	0.037	0.1806	0.0034	0.64495	5.5371	0.047	0.07488	0.001	0.05372	0.001	1069.7	13	1069.8	19	1062	18	1057	20	100.009	100.734
359	91500-5	8574c_TRA_Data	16/11/2018 (6)	28.151	141	80.9	30.22	0.373548	3	235500	78500	1.851	0.037	0.178	0.0034	0.61667	5.61798	0.052	0.07493	0.001	0.05356	0.00098	1062.9	13	1055.8	19	1071.6	15	1054	19	99.332	98.5256
360	91500-6	8574c_TRA_Data	16/11/2018 (6)	28.134	141	81.1	30.61	0.377435	33	241200	7309.09	1.848	0.036	0.1788	0.0034	0.6024	5.59284	0.053	0.07497	0.001	0.05353	0.001	1061.9	13	1060.1	19	1065	16	1054	20	99.8305	99.5399
361	91500-7	8574c_TRA_Data	16/11/2018 (6)	28.155	142	78.6	29.39	0.373919	8	234000	29250	1.84	0.035	0.1798	0.0034	0.51412	5.56173	0.05	0.07479	0.001	0.05417	0.0012	1059.3	13	1066.8	19	1064.1	15	1066	22	100.708	100.254
362	91500-8	8575c_TRA_Data	16/11/2018 (6)	28.109	142	80.8	30.3	0.375	28	233000	8321.43	1.824	0.037	0.1773	0.0035	0.68426	5.64016	0.057	0.07471	0.001	0.05355	0.0011	1053.4	13	1051.8	19	1061	15	1054	20	99.8481	99.1329
363	91500-9	8575c_TRA_Data	16/11/2018 (6)	28.165	142	79.3	29.77	0.37541	5	230400	46080	1.859	0.036	0.1795	0.0035	0.51353	5.57103	0.056	0.07498	0.001	0.05422	0.0011	1065.9	13	1064.1	19	1064	16	1067	20	99.8311	100.009
364	91500-10	8575c_TRA_Data	16/11/2018 (6)	28.132	142	79.9	29.74	0.372215	46	227100	4936.96	1.836	0.036	0.1778	0.0034	0.52884	5.6243	0.049	0.07482	0.0011	0.05414	0.0011	1057.7	13	1055	18	1065	17	1065	21	99.7447	99.061
365	91500-11	8575c_TRA_Data	16/11/2018 (6)	28.127	142	79.8	30.05	0.376566	13	230000	17692.3	1.868	0.037	0.1811	0.0035	0.60979	5.52181	0.053	0.07493	0.001	0.05369	0.001	1069	13	1072.7	19	1066	16	1057	19	100.346	100.629
366	91500-12	8575c_TRA_Data	16/11/2018 (6)	28.124	142	80.2	30.17	0.376185	1	230400	230400	1.858	0.037	0.1795	0.0034	0.67066	5.57103	0.046	0.07488	0.001	0.05323	0.0011	1065.5	13	1064.2	18	1066.5	14	1048	21	99.878	99.7843
367	91500-1	8510c_TRA_Data	06/11/2018 (3)	26.127	132	77.8	29.62	0.38072	9	174600	19400	1.867	0.049	0.1812	0.0048	0.62136	5.51876	0.055	0.07479	0.00071	0.05314	0.0016	1068.3	17	1073.3	26	1058	13	1046	31	100.468	101.446
368	91500-2	8510c_TRA_Data	06/11/2018 (3)	26.135	132	81.5	30.56	0.374969	31	178500	5758.06	1.833	0.048	0.177	0.0047	0.66298	5.64972	0.062	0.07499	0.00069	0.05321	0.0016	1056.4	17	1050	26	1067	11	1048	30	99.3942	98.4067
369	91500-3	8510c_TRA_Data	06/11/2018 (3)	26.132	131	80	29.8	0.3725	45	177700	3948.89	1.859	0.049	0.1794	0.0047	0.6631	5.57414	0.056	0.075	0.00073	0.0546	0.0017	1066.7	17	1063.6	26	1067	12	1074	32	99.7094	99.6813
370	91500-4	8510c_TRA_Data	06/11/2018 (3)	26.124	132	79.6	29.91	0.375754	32	178000	5562.5	1.868	0.049	0.1809	0.0047	0.58875	5.52792	0.052	0.07481	0.00077	0.0544	0.0017	1070	18	1071.4	26	1062	11	1070	32	100.131	100.885
371	91500-5	8510c_TRA_Data	06/11/2018 (3)	26.134	131	81.6	30.41	0.372672	30	179800	5993.33	1.834	0.048	0.1783	0.0047	0.6148	5.60853	0.059	0.0745	0.00073	0.05398	0.0016	1056.7	17	1057	26	1053	13	1062	31	100.028	100.38
372	91500-6	8510c_TRA_Data	06/11/2018 (3)	22.762	114	80.5	30.3	0.376398	1	174400	174400	1.81	0.048	0.1748	0.0046	0.63008	5.72082	0.059	0.07515	0.00079	0.0537	0.0016	1047.9	18	1038	25	1071	12	1057	32	99.0553	96.9188
373	91500-7	8510c_TRA_Data	06/11/2018 (3)	26.124	132	78.6	29.31	0.372901	36	172500	4791.67	1.86	0.049	0.18	0.0047	0.6491	5.55556	0.053	0.07502	0.00067	0.05376	0.0016	1066	17	1066.8	26	1067.2	9.5	1058	31	100.075	99.9625
374	91500-8	8511c_TRA_Data	06/11/2018 (3)	26.116	131	81.4	30.48	0.374447	24	176700	7362.5	1.851	0.048	0.1795	0.0047	0.68576	5.57103	0.052	0.07482	0.00062	0.05407	0.0017	1062.9	17	1063.9	26	1062.6	9.7	1064	32	100.094	100.122
375	91500-9	8511c_TRA_Data	06/11/2018 (3)	26.12	132	79	29.65	0.375316	28	172000	6142.86	1.873	0.049	0.1806	0.0047	0.5718	5.5371	0.054	0.07504	0.00076	0.05238	0.0016	1070.6	17	1070.2	26	1070	12	1032	31	99.9626	100.019
376	91500-10	8511c_TRA_Data	06/11/2018 (3)	26.126	132	81.4	30.39	0.373342	72	175900	2443.06	1.864	0.049	0.1807	0.0048	0.67568	5.53403	0.059	0.07479	0.00066	0.05395	0.0016	1067.6	17	1071	26	1064	10	1062	32	100.318	100.658
377	91500-11	8511c_TRA_Data	06/11/2018 (3)	26.119	132	79.3	29.64	0.37377	16	168600	10537.5	1.832	0.049	0.1775	0.0047	0.55167	5.6338	0.054	0.07491	0.00083	0.05444	0.0017	1055.8	17	1053.1	25	1066	11	1071	32	99.7443	98.7899
378	91500-12	8511c_TRA_Data	06/11/2018 (3)	26.114	131	79.4	30.08	0.378841	49	170800	3485.71	1.844	0.048	0.1796	0.0048	0.64285	5.56793	0.056	0.0748	0.00069	0.05355	0.0017	1060.3	17	1064	26	1059	12	1054	32	100.349	100.472
379	91500-1	8576c_TRA_Data	16/11/2018 (6)	28.158	142	76	30.01	0.394868	20	227000	11350	1.852	0.022	0.1785	0.0027	0.6815	5.60224	0.051	0.07498	0.00068	0.05382	0.0021	1063.2	7.8	1058.7	14	1067	10	1059	41	99.5767	99.2221
380	91500-2	8576c_TRA_Data	16/11/2018 (6)	28.128	142	81.5	29.65	0.363804	45	226400	5031.11	1.85	0.02	0.1801	0.0027	0.60421	5.55247	0.048	0.07448	0.00067	0.05365	0.0022	1063.5	7.2	1067.3	15	1055.2	11	1056	42	100.357	101.147
381	91500-3	8576c_TRA_Data	16/11/2018 (6)	28.118	142	145.9	32.01	0.219397	30	227200	7573.33	1.86	0.021	0.1799	0.0027	0.59379	5.55864	0.048	0.07514	0.0007	0.05365	0.0021	1066.1	7.5	1066	15	1073.1	10	1056	41	99.9906	99.3384
382	91500-5	8576c_TRA_Data	16/11/2018 (6)	28.184	142	151	33.5	0.221854	17	219700	12923.5	1.838	0.021	0.1774	0.0027	0.54504	5.63698	0.053	0.07508	0.00076	0.05381	0.0022	1058.5	7.3	1052.5	15	1072	12	1059	41	99.4332	98.181
383	91500-6	8577c_TRA_Data	16/11/2018 (6)	28.122	142	77.9	29.84	0.383055	4	221300	55325	1.858	0.022	0.1807	0.0027	0.53293	5.53403	0.05	0.07471	0.00076	0.0538	0.0022	1066.5	7.7	1070.7	15	1058	11	1059	42	100.394	101.2
384	91500-7	8577c_TRA_Data	16/11/2018 (6)	28.12	142	81.3	30.04	0.369496	45	217500	4833.33	1.841	0.023	0.1782	0.0027	0.56621	5.61167	0.055	0.07497	0.00074	0.05368	0.0022	1059.3	8.2	1056.9	15	1067	12	1057	41	99.7734	99.0534
385	91500-8	8577c_TRA_Data	16/11/2018 (6)	28.129	142	80.4	29.98	0.372886	10	228400	22840	1.851	0.023	0.1791	0.0027	0.63312	5.58347	0.053	0.07512	0.00077	0.05372	0.0021	1062.9	8.3	1062.1	15	1069	12	1057	41	99.9247	99.3545
386	91500-9	8577c_TRA_Data	16/11/2018 (6)	28.129	142	79.4	29.97	0.377456	24	218900	9120.83	1.848	0.023	0.1797	0.0027	0.62692	5.56483	0.052	0.07454	0.00073	0.05377	0.0021	1061.9	8.1	1065	15	1055	12	1058	41	100.292	100.948
387	91500-10	8577c_TRA_Data	16/11/2018 (6)	28.126	142	79.9	30.01	0.375594	32	224100	7003.12	1.854	0.021	0.1789	0.0027	0.57798	5.58971	0.051	0.07523	0.00075	0.05364	0.0022	1064.1	7.6	1060.7	15	1074	12	1056	41	99.6805	98.7616
388	91500-11	8577c_TRA_Data	16/11/2018 (6)	28.116	142	80.4	29.99	0.37301	52	225100	4328.85	1.837	0.022	0.1778	0.0027	0.55291	5.6243	0.05	0.07497	0.00077	0.05397	0.0022	1057.9	8.1	1054.5	15	1069	12	1062	42	99.6786	98.6436
389	91500-12	8577c_TRA_Data	16/11/2018 (6)	28.116	142	79.8	30.02	0.37619	17	226200	13305.9	1.86	0.024	0.1806	0.0028	0.65409	5.5371	0.052	0.07458	0.00075	0.05365	0.0022	1066	8.3	1069.8	15	1054	12	1056	42	100.356	101.499
390	91500-1	8512c_TRA_Data	06/11/2018 (3)	26.138	132	81.5	30.23	0.37092	16	174500	10906.2	1.826	0.055	0.177	0.0039	0.62133	5.64972	0.051	0.07492	0.001	0.0543	0.001	1053.8	20	1050.5	21	1068	18	1068	20	99.6868	98.3614
391	91500-2	8512c_TRA_Data	06/11/2018 (3)	26.13	131	77.8	29.65	0.381105	26	172800	6646.15	1.893	0.057	0.1829	0.0041	0.59424	5.46747	0.053	0.0751	0.0011	0.05396	0.00098	1077.7	20	1082.4	22	1070	15	1062	19	100.436	101.159
392	91500-3	8512c_TRA_Data	06/11/2018 (3)	26.198	132	78.8	29.57	0.375254	15	171500	11433.3	1.845	0.056	0.1797	0.004	0.67686	5.56483	0.056	0.07439	0.001	0.05351	0.00093	1060.7	20	1064.9	22	1050	16	1053	18	100.396	101.419
393	91500-4	8512c_TRA_Data	06/11/2018 (3)	26.138	132	80.2	29.94	0.373317	10	172100	17210	1.843	0.056	0.1784	0.004	0.6267	5.60538	0.058	0.07483	0.0011	0.05325	0.00083	1059.9	20	1058	22	1063	17	1048	16	99.8207	99.5296
394	91500-5	8512c_TRA_Data	06/11/2018 (3)	26.128	132	82.6	30.57	0.370097	29	175800	6062.07	1.842	0.056	0.1782	0.004	0.63743	5.61167	0.056	0.07495	0.0011	0.05383	0.00078	1060.8	19	1057	22	1066	17	1059	15	99.6418	99.1557
395	91500-6	8512c_TRA_Data	06/11/2018 (3)	26.13	132	83.7	32.48	0.388053	54	166800	3088.89	1.847	0.056	0.1787	0.0039	0.58792	5.59597	0.051	0.07545	0.0011	0.05405	0.00092	1061.2	20	1059.8	21	1078	17	1064	18	99.8681	98.3117
396	91500-7	8512c_TRA_Data	06/11/2018 (3)	26.11	131	75.3	26.89	0.357105	2	149400	74700	1.855	0.057	0.18	0.0042	0.68086	5.55556	0.065	0.0751	0.0011	0.0534	0.001	1064.1	20	1067	23	1072	18	1052	19	100.273	99.5336
397	91500-8	8513c_TRA_Data	06/11/2018 (3)	26.126	132	79.6	29.92	0.375879	34	144300	4244.12	1.852	0.057	0.1788	0.004	0.56253	5.59284	0.058	0.07471	0.0011	0.0537	0.001	1062.9	20	1060	22	1060	17	1056	20	99.7272	100
398	91500-9	8513c_TRA_Data	06/11/2018 (3)	26.129	132	80.2	30	0.374065	8	145300	18162.5	1.847	0.057	0.1796	0.0041	0.60684	5.56793	0.061	0.07434	0.0011	0.054	0.0011	1061.1	20	1065	22	1049	17	1063	21	100.368	101.525
399	91500-10	8513c_TRA_Data	06/11/2018 (3)	26.113	131	79.7	29.83	0.374279	4	141700	35425	1.862	0.056	0.1794	0.0042	0.66548	5.57414	0.062	0.07541	0.0011	0.0537	0.0012	1066.7	20	1063	23	1076	17	1057	22	99.6531	98.7918
400	91500-11	8513c_TRA_Data	06/11/2018 (3)	26.117	131	82	30.81	0.375732	57	145100	2545.61	1.822	0.056	0.1779	0.0041	0.69985	5.62113	0.062	0.07437	0.0011	0.0535	0.001	1052.1	20	1055	22	1050	18	1054	20	100.276	100.476
401	91500-12	8513c_TRA_Data	06/11/2018 (3)	26.117	132	79.3	29.85	0.376419	25	142600	5704	1.863	0.056	0.1801	0.004	0.53222	5.55247	0.057	0.07508	0.0011	0.054	0.0012	1067	20	1067	22	1069	16	1062	22	100	99.8129
402	91500-1	8578c_TRA_Data	16/11/2018 (6)	28.109	141	79.4	29.89	0.376448	13	227900	17530.8	1.856	0.045	0.1802	0.005	0.57855	5.54939	0.046	0.0746	0.0068	0.05299	0.0086	1064.6	25	1068	27	1055.8	18	1044	28	100.319	101.156
403	91500-2	8578c_TRA_Data	16/11/2018 (6)	28.127	142	81.6	30.37	0.372181	1	228300	228300	1.854	0.045	0.1792	0.0049	0.54984	5.58036	0.049	0.07489	0.0068	0.05385	0.0088	1063.9	25	1062.3	27	1066	22	1060	30	99.8496	99.6529
404	91500-3	8578c_TRA_Data	16/11/2018 (6)	28.12	142	79	29.63	0.375063	22	215800	9809.09	1.84	0.045	0.1786	0.0049	0.58141	5.5991	0.049	0.07469	0.0068	0.05366	0.0087	1059	25	1059.2	27	1060	20	1056	30	100.019	99.9245
405	91500-4	8578c_TRA_Data	16/11/2018 (6)	28.112	142	79.3	30.09	0.379445	4	213400	53350	1.85	0.045	0.1801	0.005	0.65864	5.55247	0.055	0.07476	0.0068	0.05394	0.0088	1063.8	25	1067.5	28	1061	22	1062	34	100.348	100.613
406	91500-5	8578c_TRA_Data	16/11/2018 (6)	28.115	142	80.4	30.03	0.373507	10	212900	21290	1.834	0.045	0.1779	0.0049	0.58578	5.62113	0.047	0.07499	0.0068	0.05457	0.0089	1058	25	1055.2	27	1066	20	1074	36	99.7353	98.9869
407	91500-6	8578c_TRA_Data	16/11/2018 (6)	28.157	142	80.1	30	0.374532	14	220500	15750	1.853	0.045	0.1786	0.0048	0.53405	5.5991	0.051	0.07504	0.0068	0.05411	0.0088	1063.7	25	1060.5	27	1065	22	1065	32	99.6992	99.5775
408	91500-7	8578c_TRA_Data	16/11/2018 (6)	28.119	142	80	30.01	0.375125	1	221900	221900	1.841	0.045	0.1776	0.0048	0.60495	5.63063	0.053	0.07481	0.0068	0.05248	0.0085	1059.3	25	1054.7	27	1063	19	1034	30	99.5658	99.2192
409	91500-9	8579c_TRA_Data	16/11/2018 (6)	28.202	142	79.2	29.94	0.37803	12	225000	18750	1.866	0.045	0.1781	0.005	0.63878	5.61482	0.055	0.07507	0.0068	0.05422	0.0088	1068.3	25	1056.3	27	1072.2	18	1067	34	98.8767	98.5171
410	91500-10	8579c_TRA_Data	16/11/2018 (6)	28.124	141	79.8	29.99	0.375815	17	225200	13247.1	1.828	0.045	0.1775	0.0049	0.58887	5.6338	0.052	0.07448	0.0067	0.05331	0.0087	1054.8	25	1053.3	27	1055.6	19	1049	36	99.8578	99.7821
411	91500-11	8579c_TRA_Data	16/11/2018 (6)	28.131	142	80.7	30.06	0.372491	30	227500	7583.33	1.84	0.045	0.1789	0.0049	0.5543	5.58971	0.044	0.07464	0.0068	0.05455	0.0089	1060.2	25	1060.8	27	1059	20	1073	34	100.057	100.17
412	91500-12	8579c_TRA_Data	16/11/2018 (6)	28.119	142	79.6	29.98	0.376633	22	226000	10272.7	1.854	0.045	0.1804	0.005	0.60888	5.54324	0.054	0.07469	0.0068	0.05258	0.0085	1064.8	25	1068.7	28	1059	22	1036	30	100.366	100.916
413	91500-1	8514c_TRA_Data	06/11/2018 (3)	28.118	141	80.3	30.03	0.373973	61	131600	2157.38	1.844	0.038	0.1785	0.0029	0.66861	5.60224	0.069	0.07485	0.0015	0.0543	0.0016	1059.8	14	1058	16	1062	21	1068	32	99.8302	99.6234
414	91500-2	8514c_TRA_Data	06/11/2018 (3)	28.124	142	79.5	29.82	0.375094	39	131900	3382.05	1.867	0.037	0.1802	0.0028	0.50238	5.54939	0.064	0.07509	0.0016	0.0542	0.0017	1068.1	13	1068	15	1070	21	1067	32	99.9906	99.8131
415	91500-3	8514c_TRA_Data	06/11/2018 (3)	28.133	142	80.3	30.02	0.373848	42	131900	3140.48	1.836	0.037	0.1789	0.0028	0.62705	5.58971	0.062	0.07468	0.0015	0.0529	0.0015	1058.3	13	1060	15	1064	22	1041	30	100.161	99.6241
416	91500-4	8514c_TRA_Data	06/11/2018 (3)	28.149	142	80.6	30.43	0.377543	39	132800	3405.13	1.846	0.036	0.1792	0.0028	0.47126	5.58036	0.063	0.07496	0.0015	0.0538	0.0016	1061	13	1062	15	1068	24	1059	31	100.094	99.4382
417	91500-5	8514c_TRA_Data	06/11/2018 (3)	28.131	142	79.8	29.84	0.373935	53	132400	2498.11	1.856	0.037	0.1791	0.0026	0.46595	5.58347	0.057	0.07489	0.0016	0.05365	0.0015	1064.3	13	1062	14	1060	23	1056	29	99.7839	100.189
418	91500-6	8514c_TRA_Data	06/11/2018 (3)	28.126	142	80.7	30.01	0.371871	31	132300	4267.74	1.851	0.037	0.1792	0.0028	0.57205	5.58036	0.061	0.07489	0.0015	0.0534	0.0016	1063.9	13	1062	15	1062	26	1052	30	99.8214	100
419	91500-7	8514c_TRA_Data	06/11/2018 (3)	28.13	142	79.7	29.97	0.376035	9	130500	14500	1.849	0.037	0.1792	0.0027	0.60902	5.58036	0.059	0.07487	0.0015	0.0543	0.0016	1062	13	1064	15	1062	24	1068	31	100.188	100.188
420	91500-8	8515c_TRA_Data	06/11/2018 (3)	28.125	142	80.3	30.27	0.376961	45	128100	2846.67	1.847	0.039	0.1787	0.0027	0.61499	5.59597	0.059	0.0749	0.0015	0.0535	0.0016	1061.1	14	1059	15	1063	22	1052	31	99.8021	99.6237
421	91500-9	8515c_TRA_Data	06/11/2018 (3)	28.138	142	78.3	29.69	0.379183	4	125900	31475	1.851	0.038	0.1797	0.0027	0.61806	5.56483	0.06	0.07486	0.0015	0.054	0.0016	1062.4	14	1065	15	1064	24	1063	31	100.245	100.094
422	91500-10	8515c_TRA_Data	06/11/2018 (3)	28.113	141	79.9	30.11	0.376846	46	128600	2795.65	1.849	0.037	0.1792	0.0027	0.58908	5.58036	0.06	0.07483	0.0015	0.0532	0.0016	1063.1	13	1062	15	1067	25	1047	31	99.8965	99.5314
423	91500-11	8515c_TRA_Data	06/11/2018 (3)	28.132	142	80.5	30.07	0.37354	48	128300	2672.92	1.857	0.039	0.1793	0.0027	0.5011	5.57724	0.058	0.07499	0.0016	0.0541	0.0015	1064.5	14	1063	15	1067	22	1064	30	99.8591	99.6251
424	91500-12	8515c_TRA_Data	06/11/2018 (3)	28.176	142	80.6	29.87	0.370596	58	128000	2206.9	1.845	0.036	0.179	0.0028	0.64254	5.58659	0.065	0.07485	0.0015	0.0538	0.0017	1060.7	13	1061	15	1062	24	1060	32	100.028	99.9058
425	91500-1	8580c_TRA_Data	16/11/2018 (6)	28.127	141	79.7	29.96	0.37591	4	208400	52100	1.859	0.025	0.1803	0.0018	0.65244	5.54631	0.055	0.07495	0.00085	0.05444	0.0017	1065.5	8.8	1068.5	9.9	1065	14	1071	32	100.282	100.329
426	91500-2	8580c_TRA_Data	16/11/2018 (6)	28.125	142	80.3	29.98	0.37335	21	210800	10038.1	1.839	0.023	0.1784	0.0018	0.68235	5.60538	0.057	0.07467	0.00077	0.05378	0.0016	1058.4	8.3	1058.2	9.8	1056.5	11	1059	31	99.9811	100.161
427	91500-3	8580c_TRA_Data	16/11/2018 (6)	28.13	142	80.1	30.12	0.37603	2	210300	105150	1.848	0.023	0.178	0.0017	0.57665	5.61798	0.05	0.07523	0.00088	0.05294	0.0016	1061.8	8.3	1055.7	9.1	1076	15	1042	32	99.4255	98.1134
428	91500-4	8580c_TRA_Data	16/11/2018 (6)	28.119	141	79.8	30.14	0.377694	9	211000	23444.4	1.857	0.023	0.1794	0.0017	0.58043	5.57414	0.052	0.07488	0.00081	0.05345	0.0016	1065.2	8	1063.5	9.2	1069	12	1052	31	99.8404	99.4855
429	91500-5	8580c_TRA_Data	16/11/2018 (6)	28.119	141	80	29.86	0.37325	28	211300	7546.43	1.848	0.021	0.1794	0.0017	0.55632	5.57414	0.052	0.07479	0.00081	0.05406	0.0017	1062.1	7.4	1063.4	9	1064	13	1064	32	100.122	99.9436
430	91500-6	8580c_TRA_Data	16/11/2018 (6)	28.127	142	80	29.99	0.374875	21	223100	10623.8	1.852	0.022	0.1794	0.0017	0.59742	5.57414	0.053	0.07504	0.00083	0.0537	0.0016	1063.5	7.9	1063.5	9.4	1070	13	1057	31	100	99.3925
431	91500-7	8580c_TRA_Data	16/11/2018 (6)	28.12	141	80	30.02	0.37525	17	225900	13288.2	1.847	0.023	0.1795	0.0017	0.60602	5.57103	0.053	0.07468	0.00084	0.05361	0.0016	1062.3	8.4	1064	9.1	1058	12	1055	31	100.16	100.567
432	91500-8	8581c_TRA_Data	16/11/2018 (6)	28.228	143	80.8	30.08	0.372277	24	222500	9270.83	1.848	0.022	0.1788	0.0018	0.58565	5.59284	0.056	0.07488	0.00084	0.05412	0.0017	1062.7	7.8	1060	9.6	1065.2	12	1065	32	99.7459	99.5118
433	91500-9	8581c_TRA_Data	16/11/2018 (6)	28.113	142	79	29.85	0.377848	44	212400	4827.27	1.854	0.022	0.1796	0.0016	0.55576	5.56793	0.049	0.07503	0.00086	0.05391	0.0017	1064.9	7.9	1064.3	8.6	1067	14	1061	32	99.9437	99.747
434	91500-10	8581c_TRA_Data	16/11/2018 (6)	28.113	141	80.5	30.16	0.374658	59	213200	3613.56	1.849	0.022	0.179	0.0018	0.63286	5.58659	0.057	0.07475	0.00084	0.05283	0.0017	1062.2	8.1	1061	10	1060	14	1040	32	99.887	100.094
435	91500-11	8581c_TRA_Data	16/11/2018 (6)	28.161	141	78.9	29.73	0.376806	6	215300	35883.3	1.836	0.022	0.1799	0.0015	0.52514	5.55864	0.046	0.07417	0.00085	0.05298	0.0016	1057.6	7.8	1066.3	8.1	1045.3	12	1043	31	100.823	102.009
436	91500-12	8581c_TRA_Data	16/11/2018 (6)	28.118	142	80.9	30.21	0.373424	29	225000	7758.62	1.872	0.027	0.1782	0.0016	0.43866	5.61167	0.051	0.07664	0.0011	0.0571	0.002	1069.8	9.7	1056.9	8.9	1110	23	1122	39	98.7942	95.2162
437	91500-1	8516c_TRA_Data	06/11/2018 (3)	28.133	142	77.9	28.75	0.369063	31	110600	3567.74	1.846	0.051	0.1778	0.0039	0.61687	5.6243	0.062	0.07493	0.00082	0.0544	0.0011	1061.9	18	1055	21	1066	14	1071	21	99.3502	98.9681
438	91500-2	8516c_TRA_Data	06/11/2018 (3)	28.127	142	79.7	29.79	0.373777	20	112600	5630	1.842	0.051	0.1776	0.0039	0.61599	5.63063	0.064	0.07498	0.00084	0.0532	0.001	1059	18	1054	21	1067	13	1047	20	99.5279	98.7816
439	91500-3	8516c_TRA_Data	06/11/2018 (3)	28.118	142	80.3	30	0.373599	27	115200	4266.67	1.856	0.052	0.1802	0.0039	0.58806	5.54939	0.06	0.07491	0.00089	0.05342	0.00094	1064.1	18	1068	22	1062	12	1052	18	100.367	100.565
440	91500-4	8516c_TRA_Data	06/11/2018 (3)	28.137	142	81	30.93	0.381852	35	117900	3368.57	1.878	0.052	0.1828	0.0041	0.68922	5.47046	0.068	0.07471	0.00078	0.0538	0.0011	1071.8	18	1082	23	1061.5	9.8	1059	21	100.952	101.931
441	91500-5	8516c_TRA_Data	06/11/2018 (3)	28.12	141	81.9	30.62	0.373871	36	116700	3241.67	1.832	0.051	0.1783	0.0039	0.59403	5.60853	0.06	0.07487	0.00081	0.0541	0.0012	1055.4	18	1057	21	1060	14	1064	22	100.152	99.717
442	91500-6	8516c_TRA_Data	06/11/2018 (3)	28.131	142	80.3	29.99	0.373474	20	116800	5840	1.85	0.05	0.1796	0.0039	0.60714	5.56793	0.06	0.07493	0.00081	0.0536	0.0011	1063.2	18	1065	22	1063	11	1054	20	100.169	100.188
443	91500-7	8516c_TRA_Data	06/11/2018 (3)	28.128	142	81.3	31.03	0.381673	11	118600	10781.8	1.848	0.05	0.1795	0.0039	0.61232	5.57103	0.061	0.07481	0.0008	0.054	0.0011	1062.6	18	1064	21	1062	13	1063	22	100.132	100.188
444	91500-8	8517c_TRA_Data	06/11/2018 (3)	28.118	140	77.6	29.5	0.380155	3	114200	38066.7	1.857	0.052	0.1791	0.0039	0.65126	5.58347	0.06	0.075	0.00085	0.0537	0.0011	1064.2	19	1062	21	1065	13	1057	20	99.7933	99.7183
445	91500-9	8517c_TRA_Data	06/11/2018 (3)	28.119	140	80.5	30.21	0.37528	35	117800	3365.71	1.848	0.051	0.1787	0.0041	0.61816	5.59597	0.071	0.07481	0.00085	0.0538	0.0011	1061.4	18	1060	22	1066	13	1058	22	99.8681	99.4371
446	91500-10	8517c_TRA_Data	06/11/2018 (3)	28.124	141	81.2	30.27	0.372783	17	118300	6958.82	1.837	0.049	0.1773	0.0038	0.52971	5.64016	0.058	0.07489	0.00079	0.0535	0.0011	1058.7	18	1052.2	21	1065	12	1052	21	99.386	98.7981
447	91500-11	8517c_TRA_Data	06/11/2018 (3)	28.123	141	78.6	28.82	0.366667	35	116300	3322.86	1.86	0.052	0.1798	0.004	0.61203	5.56173	0.069	0.07499	0.00088	0.0542	0.0012	1065.3	18	1066	22	1066	13	1065	23	100.066	100
448	91500-12	8517c_TRA_Data	06/11/2018 (3)	28.121	141	80.7	30.27	0.375093	37	119300	3224.32	1.856	0.05	0.1805	0.0039	0.58705	5.54017	0.06	0.07477	0.00079	0.0537	0.0011	1064.3	18	1070	22	1063	14	1056	22	100.536	100.659
449	91500-1	8518c_TRA_Data	06/11/2018 (3)	28.128	142	82.4	30.83	0.37415	1	120400	120400	1.837	0.053	0.1786	0.0042	0.69575	5.5991	0.062	0.07499	0.0013	0.0534	0.0021	1057.3	19	1059	23	1068	20	1050	39	100.161	99.1573
450	91500-2	8518c_TRA_Data	06/11/2018 (3)	28.129	142	75.4	27.14	0.359947	8	109100	13637.5	1.809	0.052	0.1766	0.0042	0.64012	5.66251	0.066	0.07455	0.0013	0.0524	0.002	1047.4	19	1048	23	1057	17	1031	39	100.057	99.1485
451	91500-3	8518c_TRA_Data	06/11/2018 (3)	28.132	142	80.6	30.38	0.376923	24	119000	4958.33	1.875	0.053	0.181	0.0042	0.66968	5.52486	0.059	0.07513	0.0013	0.05498	0.0021	1073.2	20	1072	23	1071	20	1082	39	99.8882	100.093
452	91500-4	8518c_TRA_Data	06/11/2018 (3)	28.124	142	81.4	30.71	0.377273	19	120800	6357.89	1.878	0.054	0.1813	0.0042	0.57558	5.51572	0.056	0.07469	0.0013	0.0539	0.0021	1071.9	19	1074	23	1060	22	1062	41	100.196	101.321
453	91500-5	8518c_TRA_Data	06/11/2018 (3)	28.121	141	82.1	30.76	0.374665	3	119700	39900	1.854	0.054	0.1778	0.0042	0.6273	5.6243	0.069	0.07499	0.0014	0.0542	0.0021	1064.6	20	1054	23	1071	23	1070	42	99.0043	98.4127
454	91500-6	8518c_TRA_Data	06/11/2018 (3)	28.116	142	74.7	27.38	0.366533	8	110400	13800	1.866	0.055	0.1813	0.0042	0.62993	5.51572	0.062	0.07478	0.0014	0.0544	0.0022	1067.4	19	1074	23	1061	22	1071	41	100.618	101.225
455	91500-7	8518c_TRA_Data	06/11/2018 (3)	28.123	142	81.1	30.82	0.380025	23	118100	5134.78	1.834	0.053	0.1777	0.0041	0.66493	5.62746	0.062	0.07496	0.0013	0.0526	0.0021	1056.2	19	1054	22	1067	21	1036	40	99.7917	98.7816
456	91500-8	8519c_TRA_Data	06/11/2018 (3)	28.12	141	81.5	30.65	0.376074	20	118400	5920	1.844	0.053	0.1785	0.0042	0.51746	5.60224	0.062	0.0748	0.0014	0.0542	0.0021	1059.9	19	1058	23	1060	20	1067	40	99.8207	99.8113
457	91500-9	8519c_TRA_Data	06/11/2018 (3)	28.135	140	81.4	31.18	0.383047	13	119900	9223.08	1.846	0.054	0.1782	0.0042	0.61611	5.61167	0.064	0.07496	0.0014	0.0534	0.0021	1060.5	19	1057	23	1066	19	1052	40	99.67	99.1557
458	91500-10	8519c_TRA_Data	06/11/2018 (3)	28.116	141	76.1	27.8	0.365309	7	110700	15814.3	1.841	0.053	0.1801	0.0043	0.65874	5.55247	0.065	0.07478	0.0013	0.0531	0.002	1058.8	19	1067	23	1061	22	1046	39	100.774	100.566
459	91500-11	8519c_TRA_Data	06/11/2018 (3)	28.153	141	81.7	31.13	0.381028	20	120500	6025	1.863	0.054	0.18	0.0042	0.58021	5.55556	0.058	0.07496	0.0014	0.0539	0.0021	1066.6	19	1066	23	1064	19	1061	41	99.9437	100.188
460	91500-12	8519c_TRA_Data	06/11/2018 (3)	28.117	142	81.4	30.2	0.371007	38	118600	3121.05	1.851	0.053	0.1784	0.0042	0.58428	5.60538	0.062	0.07489	0.0014	0.0542	0.0021	1063.6	19	1058	23	1062	21	1066	40	99.4735	99.6234
461	91500-1	8520c_TRA_Data	06/11/2018 (3)	28.111	142	86	33.25	0.386628	22	127500	5795.45	1.851	0.027	0.1784	0.0023	0.65471	5.60538	0.059	0.07504	0.00087	0.0528	0.0022	1062.7	9.7	1059	12	1068	13	1040	42	99.6518	99.1573
462	91500-2	8520c_TRA_Data	06/11/2018 (3)	28.132	142	84.8	33.03	0.389505	3	127100	42366.7	1.857	0.031	0.18	0.0023	0.63777	5.55556	0.061	0.07498	0.00096	0.0548	0.0022	1064.5	11	1066	12	1067	15	1078	43	100.141	99.9063
463	91500-3	8520c_TRA_Data	06/11/2018 (3)	28.11	142	70.9	25.76	0.363329	10	105200	10520	1.844	0.031	0.1779	0.0023	0.57067	5.62113	0.061	0.07504	0.001	0.0545	0.0024	1059.9	11	1055	13	1067	17	1072	46	99.5377	98.8754
464	91500-4	8520c_TRA_Data	06/11/2018 (3)	28.128	142	80.5	30.64	0.380621	47	119900	2551.06	1.85	0.029	0.1792	0.0023	0.66908	5.58036	0.058	0.075	0.00089	0.0529	0.0023	1063.2	10	1062	13	1065	15	1042	43	99.8871	99.7183
465	91500-5	8520c_TRA_Data	06/11/2018 (3)	28.114	142	81.9	31.34	0.382662	15	124000	8266.67	1.851	0.03	0.1815	0.0024	0.69437	5.50964	0.064	0.07447	0.00091	0.0537	0.0022	1062.3	11	1075	13	1050	15	1057	42	101.196	102.381
466	91500-6	8520c_TRA_Data	06/11/2018 (3)	28.19	142	81.3	30.18	0.371218	1	121300	121300	1.85	0.03	0.1782	0.0024	0.58376	5.61167	0.062	0.07479	0.00099	0.0553	0.0024	1062	11	1057	13	1060	15	1087	45	99.5292	99.717
467	91500-7	8520c_TRA_Data	06/11/2018 (3)	28.129	142	85.6	33.03	0.385864	31	128400	4141.94	1.85	0.033	0.1793	0.0025	0.66916	5.57724	0.068	0.07439	0.00098	0.05279	0.0022	1062.9	11	1063	14	1052	14	1039	41	100.009	101.046
468	91500-8	8521c_TRA_Data	06/11/2018 (3)	28.118	142	83.2	31.82	0.382452	4	125600	31400	1.85	0.029	0.179	0.0022	0.53625	5.58659	0.056	0.07551	0.00098	0.0546	0.0023	1063.4	10	1061.1	12	1082	14	1074	43	99.7837	98.0684
469	91500-9	8521c_TRA_Data	06/11/2018 (3)	28.137	142	74.7	27.64	0.370013	74	112700	1522.97	1.85	0.033	0.1789	0.0025	0.64997	5.58971	0.068	0.07486	0.00099	0.0528	0.0023	1061.6	12	1061	13	1063	15	1039	44	99.9435	99.8119
470	91500-10	8521c_TRA_Data	06/11/2018 (3)	28.135	142	78.4	29.37	0.374617	62	118800	1916.13	1.848	0.028	0.1786	0.0021	0.54679	5.5991	0.055	0.07445	0.00096	0.0529	0.0022	1061.7	9.9	1059.2	12	1049	14	1042	42	99.7645	100.972
471	91500-11	8521c_TRA_Data	06/11/2018 (3)	28.124	142	81.6	30.92	0.378922	35	124100	3545.71	1.853	0.028	0.1792	0.0023	0.65235	5.58036	0.06	0.07496	0.00083	0.05417	0.0022	1063.3	10	1062	12	1068	14	1066	42	99.8777	99.4382
472	91500-12	8521c_TRA_Data	06/11/2018 (3)	28.126	141	81.2	30.82	0.379557	29	124100	4279.31	1.849	0.027	0.1802	0.0023	0.54411	5.54939	0.061	0.07502	0.00095	0.0541	0.0022	1064	10	1068	13	1067	15	1065	43	100.376	100.094
473	91500-1	8522c_TRA_Data	06/11/2018 (3)	28.14	142	79.9	29.76	0.372466	41	109400	2668.29	1.833	0.045	0.1783	0.01	0.65051	5.60853	0.068	0.07567	0.0012	0.0546	0.0011	1056.8	16	1057	55	1086	20	1074	21	100.019	97.3297
474	91500-2	8522c_TRA_Data	06/11/2018 (3)	28.128	142	80.4	30.63	0.38097	5	113300	22660	1.851	0.043	0.1801	0.01	0.48609	5.55247	0.062	0.07468	0.0012	0.0535	0.0011	1062.6	15	1067	55	1063	19	1053	21	100.414	100.376
475	91500-3	8522c_TRA_Data	06/11/2018 (3)	28.132	142	79.8	29.91	0.374812	22	110600	5027.27	1.849	0.044	0.1788	0.01	0.49421	5.59284	0.064	0.07509	0.0013	0.0534	0.0011	1062.8	16	1060	55	1070	19	1052	21	99.7365	99.0654
476	91500-4	8522c_TRA_Data	06/11/2018 (3)	28.129	142	79.9	29.7	0.371715	1	110900	110900	1.847	0.045	0.1782	0.01	0.58555	5.61167	0.064	0.07431	0.0012	0.0541	0.0014	1060.9	16	1057	55	1050	20	1065	26	99.6324	100.667
477	91500-5	8522c_TRA_Data	06/11/2018 (3)	28.121	141	80.1	30.39	0.379401	42	112700	2683.33	1.89	0.046	0.1805	0.01	0.65686	5.54017	0.069	0.07478	0.0012	0.0533	0.0011	1075.9	16	1069	55	1057	21	1052	22	99.3587	101.135
478	91500-6	8522c_TRA_Data	06/11/2018 (3)	28.119	142	79.9	29.56	0.369962	60	113200	1886.67	1.826	0.044	0.1792	0.01	0.59319	5.58036	0.065	0.0742	0.0012	0.0534	0.0012	1053.6	16	1062	57	1045	20	1051	22	100.797	101.627
479	91500-7	8522c_TRA_Data	06/11/2018 (3)	28.129	142	80.8	30.78	0.380941	5	125500	25100	1.844	0.043	0.1793	0.01	0.59741	5.57724	0.058	0.07546	0.0012	0.0539	0.001	1060.3	15	1063	55	1081	16	1061	20	100.255	98.3349
480	91500-8	8523c_TRA_Data	06/11/2018 (3)	28.129	142	79.8	29.81	0.373559	3	125100	41700	1.845	0.044	0.1785	0.01	0.67771	5.60224	0.076	0.07441	0.0012	0.0538	0.001	1060.1	16	1058	55	1054	19	1058	20	99.8019	100.38
481	91500-9	8523c_TRA_Data	06/11/2018 (3)	28.12	141	80	30.22	0.37775	4	122600	30650	1.867	0.043	0.1796	0.01	0.52256	5.56793	0.056	0.0748	0.0012	0.054	0.0011	1068.4	15	1064.6	55	1067	19	1063	21	99.6443	99.7751
482	91500-10	8523c_TRA_Data	06/11/2018 (3)	28.122	142	79.9	29.59	0.370338	3	111300	37100	1.867	0.045	0.1794	0.01	0.60464	5.57414	0.06	0.07546	0.0012	0.0538	0.00097	1067.9	16	1063	55	1072	18	1059	19	99.5412	99.1604
483	91500-11	8523c_TRA_Data	06/11/2018 (3)	28.119	141	80.8	30.52	0.377723	12	124300	10358.3	1.835	0.044	0.1789	0.01	0.66706	5.58971	0.065	0.07435	0.0012	0.0536	0.0011	1056.8	16	1061	55	1049	18	1055	21	100.397	101.144
484	91500-12	8523c_TRA_Data	06/11/2018 (3)	28.126	141	80	30.04	0.3755	9	132900	14766.7	1.847	0.043	0.1792	0.01	0.58987	5.58036	0.059	0.07518	0.0012	0.0537	0.0011	1061	15	1062	55	1070	17	1056	21	100.094	99.2523
485	91500-1	8524c_TRA_Data	06/11/2018 (3)	28.116	141	79.6	29.77	0.373995	15	122500	8166.67	1.844	0.054	0.1784	0.0049	0.59744	5.60538	0.066	0.07465	0.0013	0.0534	0.0025	1061.2	20	1058	27	1058	21	1052	24	99.6985	100
486	91500-2	8524c_TRA_Data	06/11/2018 (3)	28.122	142	82.4	31.26	0.379369	21	127400	6066.67	1.872	0.053	0.1801	0.005	0.57608	5.55247	0.063	0.07532	0.0013	0.0547	0.0026	1071	19	1067	27	1076	19	1076	24.5	99.6265	99.1636
487	91500-3	8524c_TRA_Data	06/11/2018 (3)	28.126	142	83	31.87	0.383976	9	128900	14322.2	1.853	0.055	0.1802	0.005	0.68664	5.54939	0.06	0.07471	0.0013	0.05329	0.0024	1062.8	20	1068	27	1064	19	1049	23.5	100.489	100.376
488	91500-4	8524c_TRA_Data	06/11/2018 (3)	28.131	142	82.7	30.92	0.373881	22	126200	5736.36	1.809	0.052	0.1761	0.0048	0.62949	5.67859	0.064	0.07472	0.0013	0.0529	0.0025	1048.8	19	1045	26	1057	22	1041	23.5	99.6377	98.8647
489	91500-5	8524c_TRA_Data	06/11/2018 (3)	28.169	142	70.2	25.5	0.363248	56	109400	1953.57	1.856	0.055	0.1809	0.0051	0.60121	5.52792	0.069	0.07497	0.0013	0.0552	0.0026	1064.1	19	1072	28	1062	23	1089	24.5	100.742	100.942
490	91500-6	8524c_TRA_Data	06/11/2018 (3)	28.132	142	83.3	30.92	0.371188	5	129500	25900	1.875	0.055	0.1821	0.005	0.71852	5.49149	0.063	0.07479	0.0012	0.0543	0.0025	1073.2	19	1078	27	1061	20	1069	24	100.447	101.602
491	91500-7	8524c_TRA_Data	06/11/2018 (3)	28.134	142	83.2	30.89	0.371274	11	127000	11545.5	1.859	0.053	0.1783	0.0048	0.63336	5.60853	0.06	0.07497	0.0012	0.0528	0.0025	1065.7	19	1059	27	1072	17	1039	24	99.3713	98.7873
492	91500-8	8524c_TRA_Data	06/11/2018 (3)	28.133	142	77.9	28.87	0.370603	16	114900	7181.25	1.844	0.054	0.1783	0.005	0.66161	5.60853	0.065	0.07504	0.0013	0.0526	0.0025	1059.7	19	1057	27	1067	21	1035	24	99.7452	99.0628
493	91500-9	8524c_TRA_Data	06/11/2018 (3)	28.115	142	84.1	32.58	0.387396	25	125000	5000	1.847	0.053	0.1803	0.0049	0.56034	5.54631	0.057	0.07452	0.0013	0.0542	0.0026	1062.2	19	1068	27	1056	17	1066	25	100.546	101.136
494	91500-10	8524c_TRA_Data	06/11/2018 (3)	28.129	142	76.3	28.16	0.369069	16	111900	6993.75	1.844	0.053	0.178	0.0048	0.50627	5.61798	0.06	0.07508	0.0013	0.0547	0.0026	1061.2	19	1056	27	1074	21	1076	25	99.51	98.324
	Notes
	1 Calibration standard: 91500m zircon (U=80 ppm, Th=30 ppm) (Wiedenbeck et al., 2004)
	2 Common Pb correction made using the method of Andersen (2002), as calculated by Iolite v.3.6
	3 Data corrected for background, drift and downhole U/Pb fractionation using Iolite v.3.6 and 91500 zircon as calibration standard
	4 Uncertainties Uncertainties quoted are Iolite output of 2SE for isotopic ratios, either as internal error only and expressed as 2sint for age or propagated random errors (Internal error + Calculated excess uncertainity) and expressed as 2sprop for age (Paton et al., 2010)
	5 Dates calculated using the decay constants of Jaffey et al. (1971)
	6 Concordence calculated as (206Pb-238U age/207Pb-235U age)*100
	7 Concordance calculated as (206Pb-238U age/207Pb-206Pb age)*100
	8 If zircon age <1100Ma, preferred age is 206Pb-238U age with concordance as 90%-105%; if zircon age ≥1100Ma, Preferred age is 207Pb-206Pb age with concordance as 85%-105%.

## Sheet: Zircon RMs 12um spots
Table S7. U-Th-Pb Isotope Data for Zircon Reference Materials (12 mm spots)																													Sylvester, Souders, Liu Geology G49684
Mineral Isotope Laser Laboratory (MILL), Texas Tech University, 12 µm spots, 4.25 J/cm2, 30 sec total ablation, 8Hz, 240 shots												U-Pb Data for Wetherill plot3					U-Pb Data for Tera-Wasserburg plot3				Th-Pb Data3		Dates (Ma)5								206/238-207/235	206/238-207/206
Count	Grain-Analysis No.	Source file	Date	Duration (s)	Points	U ppm1	Th ppm1	Th/U1	204Pb cps	206Pb cps	206Pb/204Pb	207Pb/235U	2sprop4	206Pb/238U	2sprop4	Error Correlation Rho	238U/206Pb	2sint4	207Pb/206Pb	2sprop4	208Pb/232Th	2sprop4	207Pb/235U	2sprop4	206Pb/238U	2sprop4	207Pb/206Pb	2sprop4	208Pb/232Th	2sprop4	% Conc7	% Conc8
	Plešovice zircon (206Pb/238U= 337.16 ± 0.11 (2s) Ma; Sláma et al., 2008 recalculated by Horstwood et al., 2016)
1	PL_1	9352c_TRA_Data	21/02/2019	6.4049	33	818	82.5	0.100856	13	265300	20407.7	0.3921	0.019	0.05414	0.00068	0.51167	18.4706	0.23	0.053	0.0028	0.01648	0.0015	335.7	14	339.9	4.1	327	68	330	29	101.251	103.945
2	PL_2	9353c_TRA_Data	21/02/2019	5.3524	27	812	97.7	0.12032	43	291300	6774.42	0.4023	0.02	0.0537	0.00065	0.33254	18.622	0.23	0.0544	0.0029	0.01587	0.0013	343.2	14	337.2	4	386	66	318	27	98.2517	87.3575
3	PL_0	9354c_TRA_Data	21/02/2019	7.0666	35	866	96.7	0.111663	48	286300	5964.58	0.4027	0.0094	0.05387	0.00055	0.41556	18.5632	0.19	0.05369	0.00087	0.01625	0.00075	343.5	6.8	338.2	3.4	355	22	326	15	98.4571	95.2676
4	PL_1	9354c_TRA_Data	21/02/2019	8.0706	41	770	87.7	0.113896	26	263600	10138.5	0.3957	0.0095	0.05424	0.00046	0.29688	18.4366	0.16	0.05239	0.00097	0.01637	0.00076	338.4	7	340.5	2.8	301	20	328	15	100.621	113.123
5	PL_2	9355c_TRA_Data	21/02/2019	6.9148	35	873	98	0.112257	4	288400	72100	0.3974	0.0096	0.05445	0.00067	0.26311	18.3655	0.22	0.0528	0.001	0.01668	0.00055	339.6	7	341.8	4.1	318	30	334	11	100.648	107.484
6	PL_0	9356c_TRA_Data	21/02/2019	9.5738	48	463	39.1	0.0844492	40	165800	4145	0.3987	0.021	0.05399	0.00073	0.35719	18.522	0.25	0.0531	0.0032	0.0168	0.0025	340.4	16	338.9	4.5	332	79	336	49	99.5593	102.078
7	PL_1	9356c_TRA_Data	21/02/2019	12.162	61	673	65.4	0.0971768	51	230600	4521.57	0.3914	0.02	0.05395	0.00056	0.28531	18.5357	0.19	0.05243	0.003	0.01623	0.0022	335.3	15	338.7	3.4	302	72	325	44	101.014	112.152
8	PL_2	9357c_TRA_Data	21/02/2019	5.239	26	901	86.1	0.0955605	20	311100	15555	0.3962	0.021	0.05409	0.00095	0.062883	18.4877	0.32	0.0525	0.0032	0.01617	0.0023	338.8	15	339.6	5.8	311	80	324	46	100.236	109.196
9	PL_0	9334c_TRA_Data	20/02/2019	6.5086	33	504	48.6	0.0964286	37	200100	5408.11	0.3998	0.016	0.05332	0.002	0.5301	18.7547	0.33	0.05383	0.0014	0.01708	0.00085	341.4	12	334.9	12	360	38	342	17	98.0961	93.0278
10	PL_1	9334c_TRA_Data	20/02/2019	8.0904	41	542	46.5	0.0857934	10	216100	21610	0.396	0.016	0.05376	0.002	0.46505	18.6012	0.33	0.0531	0.0015	0.0162	0.0011	338.6	12	337.6	12	327	36	324	22	99.7047	103.242
11	PL_2	9335c_TRA_Data	20/02/2019	9.2453	46	658	70.2	0.106687	17	270600	15917.6	0.3965	0.016	0.05332	0.0019	0.51426	18.7547	0.25	0.05387	0.0014	0.01654	0.00074	339	12	334.9	12	363	34	332	15	98.7906	92.259
12	PL_0	9343c_TRA_Data	20/02/2019	8.5456	43	810	79.7	0.0983951	87	274400	3154.02	0.3951	0.0093	0.05446	0.001	0.26684	18.3621	0.2	0.05327	0.0011	0.01599	0.00079	338	6.8	341.9	6.4	337	27	321	16	101.154	101.454
13	PL_1	9343c_TRA_Data	20/02/2019	11.946	60	690	70.8	0.102609	45	256000	5688.89	0.4086	0.0088	0.05585	0.001	0.31808	17.9051	0.16	0.05304	0.00089	0.01666	0.00068	347.7	6.3	350.3	6.2	338	22	334	13	100.748	103.639
14	PL_2	9343c_TRA_Data	20/02/2019	3.0623	16	934	86.8	0.0929336	62	307000	4951.61	0.401	0.014	0.0545	0.0014	0.071297	18.3486	0.38	0.0531	0.002	0.01497	0.00083	342.2	10	341.8	8.6	325	45	300	16	99.8831	105.169
15	PL_0	9340c_TRA_Data	20/02/2019	6.4517	33	539	43	0.0797774	36	199200	5533.33	0.3974	0.0079	0.0545	0.0008	0.2111	18.3486	0.27	0.054	0.0012	0.0171	0.0011	339.7	5.7	342.1	4.9	370	23	343	23	100.707	92.4595
16	PL_1	9340c_TRA_Data	20/02/2019	10.241	51	628	60.1	0.0957006	33	240900	7300	0.3938	0.0066	0.05408	0.00068	0.31168	18.4911	0.24	0.05316	0.00091	0.01732	0.0007	337	4.8	339.5	4.2	331	24	347	14	100.742	102.568
17	PL_2	9340c_TRA_Data	20/02/2019	6.8653	35	885	98.2	0.11096	18	323400	17966.7	0.3908	0.0081	0.05406	0.00085	0.05	18.498	0.3	0.0536	0.0014	0.01704	0.00075	334.8	5.9	339.4	5.2	351	37	342	15	101.374	96.6952
18	PL_1	9344c_TRA_Data	20/02/2019	14.566	74	435	38.3	0.088046	2	180300	90150	0.4025	0.0054	0.05526	0.00041	0.34156	18.0963	0.13	0.05284	0.00077	0.01821	0.00082	343.4	3.9	346.7	2.5	322	18	365	16	100.961	107.671
19	PL_0	9341c_TRA_Data	20/02/2019	6.6402	33	706	66.5	0.0941926	98	262300	2676.53	0.3982	0.0087	0.05384	0.00078	0.12725	18.5736	0.21	0.053	0.0011	0.01642	0.00083	340.2	6.3	338	4.8	329	32	329	16	99.3533	102.736
20	PL_1	9341c_TRA_Data	20/02/2019	5.4949	28	717	65	0.0906555	40	263000	6575	0.3947	0.009	0.0542	0.0011	0.45073	18.4502	0.34	0.0519	0.0011	0.01644	0.001	337.7	6.6	340.2	6.8	281	26	330	20	100.74	121.068
21	PL_2	9341c_TRA_Data	20/02/2019	4.5373	22	855	92.8	0.108538	10	311000	31100	0.4013	0.0076	0.05399	0.0011	0.02	18.522	0.34	0.054	0.0011	0.0167	0.0013	342.5	5.5	339	6.6	590	250	334	26	98.9781	57.4576
22	PL_0	9349c_TRA_Data	21/02/2019	4.1724	21	905	95.7	0.105746	20	366000	18300	0.3953	0.0096	0.05412	0.001	0.48968	18.4775	0.31	0.0531	0.0011	0.0173	0.0011	338.2	7	339.8	6.2	328	30	347	21	100.473	103.598
23	PL_1	9349c_TRA_Data	21/02/2019	5.8658	29	503	41.3	0.0821074	90	203700	2263.33	0.3976	0.0081	0.05404	0.00089	0.34269	18.5048	0.26	0.0534	0.001	0.0168	0.0011	339.8	5.9	339.2	5.4	342	26	337	22	99.8234	99.1813
24	PL_1	9342c_TRA_Data	20/02/2019	3.8507	20	937	99.6	0.106297	1	304200	304200	0.394	0.013	0.05438	0.0018	0.2262	18.3891	0.2	0.052	0.0018	0.0166	0.00078	336.8	9.6	341.4	11	290	36	333	16	101.366	117.724
25	PL_0	9351c_TRA_Data	21/02/2019	3.7456	18	643	53.2	0.0827372	110	260700	2370	0.3985	0.0098	0.05403	0.0012	0.50474	18.5082	0.32	0.0541	0.0017	0.0164	0.0013	340.5	7.2	339.2	7.2	372	33	330	27	99.6182	91.1828
26	PL_1	9351c_TRA_Data	21/02/2019	9.2851	47	654	61.6	0.0941896	31	275700	8893.55	0.4005	0.0056	0.05398	0.00097	0.34812	18.5254	0.21	0.05394	0.0014	0.01652	0.00073	341.9	4	338.9	5.9	370	33	331	14	99.1226	91.5946
27	PL_2	9351c_TRA_Data	21/02/2019	9.8846	49	498	42	0.0843373	7	215000	30714.3	0.3949	0.0073	0.05431	0.00091	0.27656	18.4128	0.18	0.0509	0.0015	0.01673	0.00089	337.8	5.3	340.9	5.6	235	41	335	18	100.918	145.064
	Temora-2 zircon (206Pb/238U= 416.78 ± 0.33 (2s) Ma; Black et al., 2004)
1	Tem_0	9352c_TRA_Data	21/02/2019	4.4544	23	123.6	70.7	0.572006	49	64400	1314.29	0.483	0.026	0.0662	0.0016	0.39603	15.1057	0.44	0.0531	0.0032	0.01559	0.0014	400	18	417	12	335	69	313	28	104.25	124.478
2	Tem_1	9352c_TRA_Data	21/02/2019	7.3264	37	150.8	76.5	0.507294	86	60400	702.326	0.5	0.027	0.0679	0.0013	0.45581	14.7275	0.3	0.0538	0.003	0.01947	0.0016	411	18	423.2	7.6	358	67	390	31	102.968	118.212
3	Tem_0	9354c_TRA_Data	21/02/2019	4.8236	24	83.7	26	0.310633	40	40000	1000	0.514	0.025	0.0673	0.0014	0.39611	14.8588	0.37	0.0549	0.0024	0.0208	0.0017	420	17	419.7	8.3	410	31	416	33	99.9286	102.366
4	Tem_1	9354c_TRA_Data	21/02/2019	9.5509	48	79.3	25.76	0.324842	37	39400	1064.86	0.526	0.019	0.0684	0.0016	0.41023	14.6199	0.32	0.0561	0.0018	0.0209	0.0011	428	13	426.3	9.7	445	45	417	22	99.6028	95.7978
5	Tem_0	9356c_TRA_Data	21/02/2019	2.6736	13	188.7	57	0.302067	30	78300	2610	0.513	0.044	0.0668	0.0024	0.58448	14.9701	0.52	0.0542	0.0044	0.0217	0.0031	419	30	417	14	378	120	435	61	99.5227	110.317
6	Tem_1	9356c_TRA_Data	21/02/2019	14.043	71	43.3	18.19	0.420092	27	23220	860	0.492	0.032	0.0669	0.0016	0.42128	14.9477	0.34	0.0537	0.0036	0.01822	0.0026	405	22	417.6	9.4	411	97	365	52	103.111	101.606
7	Tem_0	9334c_TRA_Data	20/02/2019	5.3406	27	118.6	59	0.49747	10	59500	5950	0.531	0.026	0.0676	0.0025	0.57561	14.7929	0.25	0.0562	0.0018	0.01973	0.0011	432	17	421.9	15	454	50	395	22	97.662	92.9295
8	Tem_1	9334c_TRA_Data	20/02/2019	5.6662	27	80.7	30.53	0.378315	20	40100	2005	0.516	0.031	0.0671	0.0031	0.39594	14.9031	0.46	0.0547	0.0022	0.0182	0.0014	422	20	419	19	433	70	365	27	99.2891	96.7667
9	Tem_0	9343c_TRA_Data	20/02/2019	2.5503	13	302	86	0.284768	20	121800	6090	0.522	0.018	0.0704	0.0018	0.02	14.2045	0.29	0.0542	0.0021	0.0197	0.0017	426	12	438.5	11	384	52	393	33	102.934	114.193
10	Tem_1	9343c_TRA_Data	20/02/2019	1.8889	9	378	177.5	0.469577	60	149500	2491.67	0.518	0.019	0.0686	0.0021	0.16784	14.5773	0.36	0.0547	0.0021	0.0194	0.0016	424	13	427	12	385	58	388	32	100.708	110.909
11	Tem_0	9340c_TRA_Data	20/02/2019	7.4491	38	120.6	35.38	0.293367	61	56700	929.508	0.522	0.017	0.07	0.0012	0.19739	14.2857	0.26	0.0555	0.002	0.02008	0.001	426	11	436	7.5	422	52	402	20	102.347	103.318
12	Tem_1	9340c_TRA_Data	20/02/2019	9.2108	47	127.7	69.1	0.541112	42	61700	1469.05	0.513	0.017	0.0671	0.0012	0.42795	14.9031	0.28	0.0555	0.0017	0.01981	0.00075	420	11	418.8	7	437	33	396	15	99.7143	95.8352
13	Tem_0	9344c_TRA_Data	20/02/2019	1.6528	8	1275	596	0.467451	10	535000	53500	0.5281	0.0098	0.068	0.0015	0.11	14.7059	0.33	0.0563	0.0018	0.02112	0.00092	430.5	6.5	424.1	9.2	455	28	422	18	98.5134	93.2088
14	Tem_1	9344c_TRA_Data	20/02/2019	2.5102	12	393	200.3	0.509669	80	179300	2241.25	0.523	0.024	0.0684	0.0014	0.43113	14.6199	0.3	0.0555	0.0021	0.02	0.0011	427	16	426.6	8.5	620	170	400	21	99.9063	68.8065
15	Tem_0	9341c_TRA_Data	20/02/2019	8.3914	42	136.5	73.2	0.536264	33	63700	1930.3	0.509	0.014	0.0672	0.0012	0.10732	14.881	0.24	0.055	0.0017	0.0196	0.00075	417.6	9.4	419.3	7.4	405	39	392	15	100.407	103.531
16	Tem_1	9341c_TRA_Data	20/02/2019	5.2875	27	255	87.8	0.344314	84	116100	1382.14	0.528	0.016	0.0673	0.0015	0.58935	14.8588	0.32	0.056	0.0012	0.0203	0.0011	430.1	10	419.7	9.3	455	26	406	21	97.582	92.2418
17	Tem_0	9349c_TRA_Data	21/02/2019	6.0361	30	452	337	0.745575	75	234500	3126.67	0.5158	0.0093	0.06808	0.001	0.15441	14.6886	0.19	0.055	0.0011	0.02026	0.00053	422.2	6.3	424.6	6.3	416	23	405	11	100.568	102.067
18	Tem_1	9349c_TRA_Data	21/02/2019	9.4225	48	222.2	134.2	0.60396	5	118800	23760	0.519	0.013	0.0678	0.0011	0.47826	14.7493	0.19	0.0555	0.0012	0.0196	0.00039	424.3	8.5	422.8	6.4	427	26	392.4	7.6	99.6465	99.0164
19	Tem_0	9342c_TRA_Data	20/02/2019	4.65	23	288	94.5	0.328125	8	116700	14587.5	0.523	0.021	0.0675	0.0025	0.42857	14.8148	0.3	0.0552	0.0021	0.0199	0.001	426	14	421	15	433	35	398	20	98.8263	97.2286
20	Tem_1	9342c_TRA_Data	20/02/2019	6.3182	32	257	115.2	0.448249	10	110100	11010	0.523	0.013	0.069	0.0025	0.43771	14.4927	0.26	0.0547	0.0014	0.02026	0.00067	426.7	8.6	429.9	15	399	31	405	13	100.75	107.744
21	Tem_0	9351c_TRA_Data	21/02/2019	21.238	107	67.1	34.16	0.509091	72	41400	575	0.512	0.014	0.0666	0.0014	0.51619	15.015	0.23	0.0553	0.0018	0.02035	0.00077	418.4	9.3	415.8	8.2	417	42	407	15	99.3786	99.7122
22	Tem_1	9351c_TRA_Data	21/02/2019	17.876	90	53.7	17.31	0.322346	68	33390	491.029	0.511	0.016	0.0666	0.0016	0.47252	15.015	0.29	0.0554	0.002	0.0214	0.0011	418	11	415.5	9.5	434	48	428	21	99.4019	95.7373
	Fish Canyon Tuff zircon (206Pb/238U= 28.478 ± 0.024 (2s) Ma; Schmitz and Bowring, 2001)
1	Fish_0	9354c_TRA_Data	21/02/2019	7.9955	40	205.3	138.1	0.672674	30	6500	216.667	0.03	0.0033	0.00438	0.00016	0.10802	228.31	8.9	0.0502	0.0054	0.00116	0.00016	30	3.2	28.2	1.1	348	98	23.5	3.2	94	8.10345
2	Fish_0	9356c_TRA_Data	21/02/2019	10.38	52	456	199.6	0.437719	29	13520	466.207	0.0284	0.0022	0.004556	7.9e-05	0.05	219.491	3.8	0.0451	0.0038	0.00136	0.00021	28.5	2.2	29.3	0.51	242	100	27.5	4.3	102.807	12.1074
3	Fish_0	9334c_TRA_Data	20/02/2019	5.485	28	225.9	79	0.349712	60	7620	127	0.0281	0.0034	0.00457	0.00021	0.18	218.818	6.2	0.0446	0.0055	0.00119	0.00019	28.2	3.3	29.38	1.3	290	120	24	3.8	104.184	10.131
4	Fish_0	9343c_TRA_Data	20/02/2019	16.634	83	127.4	64.9	0.509419	27	3770	139.63	0.0297	0.0029	0.00425	0.00014	0.23743	235.294	7.3	0.0512	0.0049	0.00137	0.00015	29.6	2.8	27.37	0.92	492	93	27.7	3.1	92.4662	5.56301
5	Fish_0	9340c_TRA_Data	20/02/2019	6.6497	33	678	368	0.542773	51	20900	409.804	0.0299	0.0016	0.004532	9.8e-05	0.091895	220.653	5.5	0.0487	0.0027	0.001294	8.9e-05	29.9	1.5	29.15	0.63	243	52	26.1	1.8	97.4916	11.9959
6	Fish_0	9344c_TRA_Data	20/02/2019	6.58	33	353	139.5	0.395184	67	10240	152.836	0.0294	0.0025	0.00452	0.00016	0.22145	221.239	8.4	0.0472	0.0037	0.00143	0.00018	29.4	2.5	29.1	1	280	110	28.9	3.7	98.9796	10.3929
7	Fish_0	9341c_TRA_Data	20/02/2019	9.6322	48	161.6	168.9	1.04517	38	6470	170.263	0.0307	0.0032	0.00451	0.00014	0.2265	221.73	6.5	0.0476	0.005	0.00163	0.00014	30.6	3.2	29.02	0.93	361	93	32.8	2.9	94.8366	8.03878
8	Fish_0	9349c_TRA_Data	21/02/2019	11.117	56	357	156.7	0.438936	52	12710	244.423	0.0297	0.0017	0.004528	0.0001	0.084875	220.848	4.8	0.0478	0.0029	0.001329	9e-05	29.7	1.7	29.12	0.65	282	74	26.8	1.8	98.0471	10.3262
9	Fish_0	9342c_TRA_Data	20/02/2019	5.9891	30	290	164.3	0.566552	42	8000	190.476	0.0282	0.0027	0.00443	0.00018	0.10381	225.734	6.5	0.0452	0.0045	0.0013	0.00017	28.2	2.6	28.5	1.2	194	93	26.3	3.3	101.064	14.6907
10	Fish_0	9351c_TRA_Data	21/02/2019	16.108	81	213	293	1.37559	26	7610	292.692	0.028	0.0019	0.00439	0.00014	0.01	227.79	6.5	0.0469	0.0035	0.001273	9.1e-05	28	1.9	28.25	0.9	273	70	25.7	1.8	100.893	10.348
	Owens Gully Diorite (OG1) zircon (207Pb/206Pb= 3465.4 ± 0.6 (2s) Ma; Stern et al., 2009)
1	OG1_0	9353c_TRA_Data	21/02/2019	4.418	22	212.7	179.6	0.844382	110	985000	8954.55	30.45	1.5	0.72	0.012	0.77634	1.38889	0.024	0.3082	0.015	0.187	0.015	3500	48	3496	47	3510	56	3464	250	99.8857	99.6011
2	OG1_0	9355c_TRA_Data	21/02/2019	2.3241	12	195	103	0.528205	60	808000	13466.7	29.23	0.86	0.713	0.015	0.4641	1.40253	0.031	0.2952	0.0074	0.192	0.012	3461	30	3470	58	3450	34	3550	210	100.26	100.58
3	OG1_0	9357c_TRA_Data	21/02/2019	7.5102	37	173.1	102.3	0.590988	54	844000	15629.6	29.86	1.5	0.741	0.011	0.62011	1.34953	0.02	0.2897	0.016	0.1868	0.025	3481	50	3572	40	3418.9	59	3461	430	102.614	104.478
4	OG1_0	9335c_TRA_Data	20/02/2019	6.2603	32	422	333	0.7891	224	2180000	9732.14	29.2	1.8	0.719	0.042	0.97123	1.39082	0.072	0.2937	0.0069	0.163	0.0058	3452	65	3480	160	3440.5	18	3052	100	100.811	101.148
5	OG1_0	9343c_TRA_Data	20/02/2019	3.4036	17	291	129.7	0.445704	50	1233000	24660	29.68	0.82	0.716	0.02	0.83781	1.39665	0.032	0.2991	0.005	0.1819	0.0081	3475	27	3478	75	3467.7	12	3380	140	100.086	100.297
6	OG1_0	9340c_TRA_Data	20/02/2019	13.535	68	226.2	222	0.981432	44	1149000	26113.6	29.08	0.42	0.7094	0.0097	0.91075	1.40964	0.02	0.2999	0.0023	0.1734	0.0041	3457	15	3462	38	3469.7	5.8	3230	70	100.145	99.7781
7	OG1_0	9344c_TRA_Data	20/02/2019	2.7819	14	194	97.4	0.502062	50	912000	18240	30.64	0.61	0.725	0.02	0.48987	1.37931	0.038	0.3051	0.0076	0.1877	0.0048	3507	20	3514	74	3488	23	3476	82	100.2	100.745
8	OG1_0	9341c_TRA_Data	20/02/2019	4.1334	21	188	95.3	0.506915	20	893000	44650	29.53	0.65	0.716	0.02	0.78001	1.39665	0.038	0.2978	0.0051	0.2026	0.007	3470	21	3480	76	3459	20	3727	120	100.288	100.607
9	OG1_0	9350c_TRA_Data	21/02/2019	2.3551	11	278	141.4	0.508633	40	1449000	36225	29.96	0.83	0.72	0.021	0.76664	1.38889	0.04	0.3017	0.006	0.186	0.0053	3485	27	3496	80	3468	17	3447	90	100.316	100.807
10	OG_0	9342c_TRA_Data	20/02/2019	4.313	21	183	143.9	0.786339	70	811000	11585.7	30.5	0.65	0.733	0.026	0.43176	1.36426	0.023	0.3011	0.0068	0.199	0.0062	3502	21	3545	98	3477	19	3670	110	101.228	101.956
11	OG1_0	9351c_TRA_Data	21/02/2019	4.1207	20	169.3	89.1	0.526285	46	923000	20065.2	29.56	0.51	0.715	0.016	0.33221	1.3986	0.025	0.2925	0.0088	0.1807	0.0064	3472	17	3475	59	3428	26	3356	110	100.086	101.371
	91500 zircon (207Pb/206Pb= 1065.4 ± 0.6 (2s); Wiedenbeck et al., 1995)
1	Z_91500_0	9352c_TRA_Data	21/02/2019	17.409	88	80.4	30.6	0.380597	33	99920	3027.88	1.855	0.088	0.1799	0.003	0.71619	5.55864	0.096	0.075	0.0038	0.0536	0.0043	1064	31	1066	16	1067	62	1055	41	100.188	99.9063
2	Z_91500_1	9352c_TRA_Data	21/02/2019	18.194	91	78.9	28.9	0.366286	26	97000	3730.77	1.871	0.089	0.1796	0.0028	0.5282	5.56793	0.088	0.076	0.0039	0.0541	0.0043	1071	33	1064	15	1092	64	1064	41	99.3464	97.4359
3	Z_91500_2	9352c_TRA_Data	21/02/2019	17.994	90	81	30.4	0.375309	25	102400	4096	1.807	0.085	0.1789	0.0031	0.71668	5.58971	0.098	0.07317	0.0037	0.0536	0.0042	1046	31	1061	17	1016	59	1055	41	101.434	104.429
4	Z_91500_3	9352c_TRA_Data	21/02/2019	17.994	90	80	30.5	0.38125	58	103100	1777.59	1.858	0.087	0.1784	0.0025	0.72682	5.60538	0.084	0.0754	0.0038	0.0535	0.0043	1065	31	1058	14	1076	67	1053	42.5	99.3427	98.3271
5	Z_91500_4	9352c_TRA_Data	21/02/2019	17.994	90	79.9	29.7	0.371715	18	102300	5683.33	1.868	0.09	0.1786	0.0027	0.57075	5.5991	0.083	0.0758	0.004	0.0539	0.0044	1068	32	1059	14	1081	78	1061	42	99.1573	97.9648
6	Z_91500_5	9352c_TRA_Data	21/02/2019	17.994	90	80	29.7	0.37125	34	119500	3514.71	1.829	0.086	0.1801	0.0026	0.70762	5.55247	0.08	0.074	0.0038	0.0538	0.0042	1054	31	1067	14	1040	72	1059	40	101.233	102.596
7	Z_91500_6	9352c_TRA_Data	21/02/2019	18.19	91	79.9	30.7	0.38423	1	115200	115200	1.876	0.09	0.1792	0.0027	0.55762	5.58036	0.085	0.0766	0.004	0.0537	0.0042	1073	33	1062	15	1103	74	1057	41	98.9748	96.2829
8	Z_91500_7	9352c_TRA_Data	21/02/2019	18.19	91	79.9	29	0.362954	13	96300	7407.69	1.854	0.09	0.1794	0.0031	0.65085	5.57414	0.097	0.0751	0.0039	0.0537	0.0043	1063	32	1063	17	1069	63	1057	42	100	99.4387
9	Z_91500_8	9352c_TRA_Data	21/02/2019	17.994	90	80.4	31.1	0.386816	15	103100	6873.33	1.844	0.089	0.1786	0.0029	0.29046	5.5991	0.095	0.0745	0.0039	0.0538	0.0043	1060	31	1059	16	1050	63	1058	42	99.9057	100.857
10	Z_91500_9	9353c_TRA_Data	21/02/2019	17.994	90	80	29.8	0.3725	62	98900	1595.16	1.843	0.088	0.178	0.0027	0.60103	5.61798	0.086	0.0749	0.0038	0.0536	0.0043	1059	31	1056	15	1066	58	1055	42	99.7167	99.0619
11	Z_91500_10	9353c_TRA_Data	21/02/2019	17.994	91	79.9	30.1	0.376721	43	100900	2346.51	1.856	0.087	0.1814	0.0028	0.56569	5.51268	0.085	0.0743	0.0038	0.054	0.0043	1066	30	1074	16	1046	61	1062	42	100.75	102.677
12	Z_91500_11	9353c_TRA_Data	21/02/2019	17.994	91	80.1	30.1	0.37578	26	101500	3903.85	1.849	0.086	0.1782	0.0028	0.56703	5.61167	0.088	0.0754	0.0039	0.0537	0.0043	1062	31	1057	15	1076	64	1056	42	99.5292	98.2342
13	Z_91500_0	9354c_TRA_Data	21/02/2019	18.132	91	76.7	28.2	0.367666	90	91200	1013.33	1.847	0.046	0.1774	0.003	0.76765	5.63698	0.096	0.0754	0.001	0.055	0.0015	1061	16	1053	16	1076	14	1081	29	99.246	97.8625
14	Z_91500_1	9354c_TRA_Data	21/02/2019	17.704	89	81.2	30.4	0.374384	10	97800	9780	1.843	0.045	0.1806	0.003	0.66935	5.5371	0.091	0.0745	0.0011	0.0539	0.0014	1059	16	1070	16	1052	18	1061	26	101.039	101.711
15	Z_91500_2	9354c_TRA_Data	21/02/2019	18.351	92	78.5	29.5	0.375796	35	95100	2717.14	1.846	0.044	0.1799	0.0028	0.65185	5.55864	0.086	0.0746	0.0011	0.0545	0.0014	1060	16	1066	15	1059	16	1072	28	100.566	100.661
16	Z_91500_3	9354c_TRA_Data	21/02/2019	17.941	90	82.6	30.6	0.37046	53	98400	1856.6	1.823	0.044	0.1771	0.0027	0.66099	5.64653	0.092	0.0745	0.0011	0.0529	0.0016	1052	16	1053	16	1052	20	1041	31	100.095	100.095
17	Z_91500_4	9354c_TRA_Data	21/02/2019	18.029	90	82.7	31.3	0.378476	28	99860	3566.43	1.879	0.045	0.1803	0.0025	0.54004	5.54631	0.079	0.0755	0.0012	0.0532	0.0013	1072	16	1068	13	1075	21	1046	25	99.6269	99.3488
18	Z_91500_5	9354c_TRA_Data	21/02/2019	18.2	91	79.5	30.3	0.381132	25	95300	3812	1.857	0.045	0.1793	0.0028	0.51443	5.57724	0.089	0.075	0.0013	0.0537	0.0015	1064	16	1063	15	1067	21	1058	29	99.906	99.6251
19	Z_91500_6	9354c_TRA_Data	21/02/2019	18.151	91	80.9	31	0.383189	29	96900	3341.38	1.855	0.045	0.1796	0.003	0.70211	5.56793	0.093	0.0748	0.001	0.0531	0.0012	1064	16	1064	16	1068	17	1046	23	100	99.6255
20	Z_91500_7	9354c_TRA_Data	21/02/2019	18.286	92	76.7	28.7	0.374185	39	91800	2353.85	1.868	0.046	0.1797	0.0029	0.61629	5.56483	0.092	0.075	0.0011	0.0542	0.0017	1068	16	1065	16	1070	17	1065	33	99.7191	99.5327
21	Z_91500_8	9354c_TRA_Data	21/02/2019	18.17	91	80.4	30.2	0.375622	40	95700	2392.5	1.846	0.049	0.1786	0.0029	0.59347	5.5991	0.094	0.0748	0.0013	0.0531	0.0015	1060	17	1059	16	1065	19	1046	28	99.9057	99.4366
22	Z_91500_9	9355c_TRA_Data	21/02/2019	18.112	91	79.8	29.8	0.373434	38	95100	2502.63	1.844	0.043	0.1793	0.0026	0.61614	5.57724	0.08	0.0749	0.0011	0.0536	0.0015	1060	15	1063	14	1066	16	1055	29	100.283	99.7186
23	Z_91500_10	9355c_TRA_Data	21/02/2019	18.048	90	82.6	31	0.375303	1	97700	97700	1.821	0.044	0.1782	0.0024	0.53532	5.61167	0.075	0.0744	0.0013	0.0535	0.0014	1052	16	1057	13	1056	20	1054	28	100.475	100.095
24	Z_91500_11	9355c_TRA_Data	21/02/2019	18.048	90	78.9	29.4	0.372624	20	94100	4705	1.874	0.046	0.1802	0.0028	0.60305	5.54939	0.082	0.0752	0.0012	0.0548	0.0016	1070	16	1068	15	1073	20	1078	30	99.8131	99.534
25	Z_91500_0	9356c_TRA_Data	21/02/2019	18.339	92	79	29.7	0.375949	19	112900	5942.11	1.857	0.095	0.1783	0.0025	0.68253	5.60853	0.079	0.07591	0.0044	0.0541	0.0073	1064.9	34	1057	13	1094	62	1065	35	99.2581	96.6179
26	Z_91500_1	9356c_TRA_Data	21/02/2019	18.088	91	79	29.8	0.377215	33	112200	3400	1.853	0.095	0.1798	0.0024	0.55715	5.56173	0.074	0.075	0.0043	0.0529	0.0072	1065	35	1066	13	1065	69	1041	35	100.094	100.094
27	Z_91500_2	9356c_TRA_Data	21/02/2019	18.045	90	83	31.3	0.377108	1	116700	116700	1.838	0.097	0.1789	0.0024	0.75229	5.58971	0.072	0.07422	0.0042	0.053	0.0072	1058	34	1061	13	1047	64	1044	35	100.284	101.337
28	Z_91500_3	9356c_TRA_Data	21/02/2019	18.192	91	78.5	29.1	0.370701	46	109500	2380.43	1.861	0.098	0.1791	0.0025	0.5744	5.58347	0.079	0.0754	0.0044	0.0543	0.0074	1066	35	1062	14	1076	56	1068	35	99.6248	98.6989
29	Z_91500_4	9356c_TRA_Data	21/02/2019	18.098	91	82.4	30.5	0.370146	69	113800	1649.28	1.845	0.1	0.1796	0.0027	0.39443	5.56793	0.082	0.0742	0.0044	0.0551	0.0076	1059	35	1064	15	1034	53	1083	35	100.472	102.901
30	Z_91500_5	9356c_TRA_Data	21/02/2019	18.245	92	77.3	29.4	0.380336	26	95400	3669.23	1.836	0.097	0.1796	0.0025	0.58816	5.56793	0.08	0.074	0.0043	0.0537	0.0074	1057	34	1065	14	1036	78	1056	35	100.757	102.799
31	Z_91500_6	9356c_TRA_Data	21/02/2019	17.951	90	80.3	30.5	0.379826	37	97600	2637.84	1.844	0.097	0.1786	0.0027	0.4216	5.5991	0.088	0.0747	0.0044	0.0534	0.0073	1060	35	1059	15	1055	65	1051	35	99.9057	100.379
32	Z_91500_7	9356c_TRA_Data	21/02/2019	18.339	92	79.3	30	0.37831	36	96500	2680.56	1.897	0.13	0.1805	0.0027	0.17091	5.54017	0.085	0.0765	0.0056	0.0606	0.0098	1072	39	1069	15	1117	130	1180	55	99.7201	95.7028
33	Z_91500_8	9357c_TRA_Data	21/02/2019	17.951	90	77.7	29.9	0.384813	32	99950	3123.44	1.796	0.095	0.1787	0.003	0.62174	5.59597	0.092	0.0734	0.0042	0.0517	0.007	1042	34	1059	16	1030	81	1018	35	101.631	102.816
34	Z_91500_0	9334c_TRA_Data	20/02/2019	20.39	102	77.7	29.14	0.375032	7	107400	15342.9	1.835	0.072	0.1787	0.0064	0.51126	5.59597	0.074	0.0747	0.0018	0.0539	0.0018	1058.5	25	1060	35	1065	25	1061	35	100.142	99.5305
35	Z_91500_1	9334c_TRA_Data	20/02/2019	16.187	81	81.2	30.33	0.373522	18	112300	6238.89	1.848	0.074	0.1789	0.0066	0.62269	5.58971	0.086	0.0752	0.0018	0.0529	0.0018	1063	28	1061	36	1070	29	1041	34	99.8119	99.1589
36	Z_91500_2	9334c_TRA_Data	20/02/2019	15.32	77	81.6	30.26	0.370833	5	115700	23140	1.874	0.08	0.1831	0.0068	0.61956	5.4615	0.09	0.0742	0.002	0.0545	0.0021	1070	28	1084	37	1044	28	1072	40	101.308	103.831
37	Z_91500_3	9334c_TRA_Data	20/02/2019	16.942	85	81.6	30.75	0.376838	28	114600	4092.86	1.845	0.075	0.179	0.0065	0.47624	5.58659	0.08	0.0747	0.0019	0.0534	0.0018	1060	27	1061	35	1055	29	1052	35	100.094	100.569
38	Z_91500_4	9334c_TRA_Data	20/02/2019	15.96	80	78.5	29.42	0.374777	26	108800	4184.62	1.833	0.074	0.177	0.0063	0.5671	5.64972	0.082	0.0749	0.0019	0.0537	0.002	1056	27	1052	37	1064	31	1058	38	99.6212	98.8722
39	Z_91500_5	9334c_TRA_Data	20/02/2019	17.057	86	80.3	29.96	0.373101	16	110800	6925	1.844	0.076	0.18	0.0067	0.57798	5.55556	0.091	0.074	0.0019	0.0555	0.002	1060	27	1066	36	1037	31	1092	39	100.566	102.797
40	Z_91500_6	9334c_TRA_Data	20/02/2019	16.187	81	79.5	30.02	0.37761	14	109300	7807.14	1.906	0.078	0.1796	0.0066	0.70594	5.56793	0.089	0.076	0.0018	0.0538	0.002	1082	27	1064	36	1095	32	1059	38	98.3364	97.1689
41	Z_91500_7	9334c_TRA_Data	20/02/2019	15.33	77	80.2	30	0.374065	41	110200	2687.8	1.814	0.075	0.1776	0.0065	0.51629	5.63063	0.089	0.074	0.0019	0.054	0.002	1049	27	1054	36	1042	31	1062	38	100.477	101.152
42	Z_91500_8	9334c_TRA_Data	20/02/2019	15.152	76	79.8	29.99	0.375815	96	111300	1159.38	1.891	0.076	0.1803	0.0067	0.62235	5.54631	0.091	0.0761	0.0019	0.0525	0.002	1077	27	1068	36	1097	31	1035	38	99.1643	97.3564
43	Z_91500_9	9335c_TRA_Data	20/02/2019	15.395	77	80.5	30.16	0.374658	77	111800	1451.95	1.826	0.076	0.1787	0.0066	0.65109	5.59597	0.09	0.0743	0.0019	0.0536	0.002	1053	27	1060	36	1043	27	1055	38	100.665	101.63
44	Z_91500_10	9335c_TRA_Data	20/02/2019	15.507	78	80.1	29.9	0.373283	23	112000	4869.57	1.841	0.076	0.1805	0.0066	0.57419	5.54017	0.087	0.0742	0.0019	0.0538	0.002	1059	27	1069	36	1045	34	1059	38	100.944	102.297
45	Z_91500_11	9335c_TRA_Data	20/02/2019	15.658	78	79.5	29.96	0.376855	5	108900	21780	1.853	0.075	0.1782	0.0066	0.46907	5.61167	0.094	0.0757	0.002	0.0538	0.002	1063	27	1057	36	1086	28	1059	38	99.4356	97.3297
46	Z_91500_0	9343c_TRA_Data	20/02/2019	17.735	89	83.3	30.9	0.370948	32	101200	3162.5	1.878	0.048	0.1798	0.0038	0.59501	5.56173	0.078	0.075	0.0015	0.0536	0.0021	1074	18	1065	21	1065	24	1055	40	99.162	100
47	Z_91500_1	9343c_TRA_Data	20/02/2019	18.046	91	81.6	30	0.367647	13	99000	7615.38	1.849	0.048	0.1778	0.0039	0.7539	5.6243	0.085	0.07454	0.0013	0.0541	0.0022	1061	17	1055	21	1058	20	1064	42	99.4345	99.7164
48	Z_91500_2	9343c_TRA_Data	20/02/2019	18.324	93	76.6	29	0.37859	41	95200	2321.95	1.862	0.049	0.1804	0.0042	0.72266	5.54324	0.092	0.0749	0.0014	0.0537	0.0022	1068	18	1069	23	1065	20	1057	43	100.094	100.376
49	Z_91500_3	9343c_TRA_Data	20/02/2019	18.046	91	80.1	30.1	0.37578	16	96600	6037.5	1.861	0.047	0.1791	0.004	0.58262	5.58347	0.086	0.0758	0.0013	0.0534	0.0022	1066	17	1062	22	1087	22	1051	42	99.6248	97.7001
50	Z_91500_4	9343c_TRA_Data	20/02/2019	17.975	90	80.6	30	0.372208	26	97000	3730.77	1.807	0.045	0.1788	0.0041	0.56107	5.59284	0.092	0.074	0.0014	0.054	0.0024	1046	16	1060	22	1045	24	1062	45	101.338	101.435
51	Z_91500_5	9343c_TRA_Data	20/02/2019	18.113	91	79.8	30	0.37594	7	95200	13600	1.845	0.048	0.1797	0.0041	0.68544	5.56483	0.088	0.0751	0.0014	0.0538	0.0021	1060	17	1065	22	1066	22	1058	41	100.472	99.9062
52	Z_91500_6	9343c_TRA_Data	20/02/2019	17.987	90	77.1	29.6	0.383917	38	92900	2444.74	1.835	0.047	0.1788	0.004	0.656	5.59284	0.092	0.0746	0.0014	0.0537	0.0021	1056	17	1060	22	1062	17	1057	40	100.379	99.8117
53	Z_91500_7	9343c_TRA_Data	20/02/2019	18.022	90	80.6	30.4	0.377171	13	98400	7569.23	1.852	0.048	0.179	0.004	0.644	5.58659	0.087	0.0749	0.0014	0.0537	0.0021	1062	17	1061	22	1058	22	1057	40	99.9058	100.284
54	Z_91500_8	9343c_TRA_Data	20/02/2019	17.975	90	79.3	30	0.37831	61	97000	1590.16	1.879	0.049	0.1794	0.004	0.60083	5.57414	0.088	0.0757	0.0015	0.0538	0.0021	1072	17	1063	22	1084	24	1058	40	99.1604	98.0627
55	Z_91500_9	9343c_TRA_Data	20/02/2019	18.175	91	80.3	29.8	0.371108	40	98900	2472.5	1.863	0.047	0.1792	0.0039	0.62467	5.58036	0.084	0.0749	0.0014	0.0537	0.0023	1066	17	1062	21	1067	24	1056	44	99.6248	99.5314
56	Z_91500_10	9343c_TRA_Data	20/02/2019	18.175	91	81	30.2	0.37284	82	99770	1216.71	1.83	0.046	0.1791	0.0038	0.67257	5.58347	0.078	0.0744	0.0014	0.0538	0.0021	1059	17	1062	21	1052	21	1058	40	100.283	100.951
57	Z_91500_0	9340c_TRA_Data	20/02/2019	15.045	75	79.1	29.46	0.37244	34	104800	3082.35	1.846	0.038	0.1791	0.0028	0.58604	5.58347	0.089	0.0753	0.0014	0.053	0.0016	1060	14	1062	15	1073	22	1043	30	100.189	98.9748
58	Z_91500_1	9340c_TRA_Data	20/02/2019	14.969	75	77.1	29.4	0.381323	1	104400	104400	1.858	0.041	0.1793	0.0026	0.57707	5.57724	0.085	0.0746	0.0013	0.0549	0.0017	1064	15	1063	14	1062	22	1079	32	99.906	100.094
59	Z_91500_2	9340c_TRA_Data	20/02/2019	15.027	76	82.8	30.77	0.371618	6	108900	18150	1.85	0.039	0.1788	0.0033	0.68672	5.59284	0.1	0.0752	0.0012	0.0547	0.0016	1062	14	1060	18	1071	18	1076	31	99.8117	98.9729
60	Z_91500_3	9340c_TRA_Data	20/02/2019	15.055	76	80.9	30.3	0.374536	10	106700	10670	1.854	0.04	0.1795	0.0029	0.63107	5.57103	0.094	0.0745	0.0013	0.0528	0.0015	1063	14	1064	16	1055	20	1039	29	100.094	100.853
61	Z_91500_4	9340c_TRA_Data	20/02/2019	14.975	75	80.9	30.4	0.375773	32	106400	3325	1.842	0.041	0.1791	0.0028	0.60156	5.58347	0.085	0.0742	0.0013	0.0538	0.0016	1059	14	1062	15	1042	20	1059	30	100.283	101.919
62	Z_91500_5	9340c_TRA_Data	20/02/2019	14.967	75	80.6	29.85	0.370347	41	104600	2551.22	1.852	0.038	0.1787	0.0029	0.16359	5.59597	0.092	0.0756	0.0013	0.0525	0.0018	1063	14	1059	16	1082	22	1033	34	99.6237	97.8743
63	Z_91500_6	9340c_TRA_Data	20/02/2019	15.1	76	79.6	29.9	0.375628	22	104100	4731.82	1.847	0.037	0.1797	0.0031	0.66562	5.56483	0.095	0.0747	0.0012	0.0539	0.0017	1061	13	1065	17	1061	16	1061	32	100.377	100.377
64	Z_91500_7	9340c_TRA_Data	20/02/2019	14.978	76	75.2	28.5	0.378989	3	101200	33733.3	1.844	0.038	0.179	0.0026	0.57127	5.58659	0.083	0.0743	0.0014	0.0541	0.0015	1060	13	1061	14	1050	23	1065	29	100.094	101.048
65	Z_91500_8	9340c_TRA_Data	20/02/2019	14.994	75	81.1	30.5	0.376079	58	107300	1850	1.858	0.036	0.1794	0.003	0.62236	5.57414	0.093	0.0759	0.0013	0.0544	0.0015	1070	14	1063	16	1089	22	1071	29	99.3458	97.6125
66	Z_91500_9	9340c_TRA_Data	20/02/2019	15.063	76	80.4	29.8	0.370647	91	104700	1150.55	1.838	0.036	0.1788	0.0028	0.65428	5.59284	0.091	0.0746	0.0012	0.0534	0.0018	1058	13	1060	15	1056	18	1051	34	100.189	100.379
67	Z_91500_10	9340c_TRA_Data	20/02/2019	15.062	76	81.7	30.7	0.375765	16	107100	6693.75	1.861	0.038	0.1795	0.0026	0.56542	5.57103	0.083	0.075	0.0013	0.054	0.0014	1066	13	1064	14	1069	22	1063	28	99.8124	99.5323
68	Z_91500_11	9340c_TRA_Data	20/02/2019	15.369	77	80.1	30	0.374532	67	105900	1580.6	1.85	0.036	0.1792	0.0028	0.61658	5.58036	0.085	0.0746	0.0012	0.053	0.0017	1062	13	1062	15	1058	16	1044	33	100	100.378
69	Z_91500_0	9344c_TRA_Data	20/02/2019	18.09	91	80.7	30.3	0.375465	12	103800	8650	1.861	0.031	0.1791	0.0027	0.61619	5.58347	0.087	0.0754	0.0012	0.0535	0.0017	1066	11	1062	15	1078	18	1052	32	99.6248	98.5158
70	Z_91500_1	9344c_TRA_Data	20/02/2019	18.033	91	79.7	29.8	0.373902	6	102100	17016.7	1.839	0.034	0.1794	0.0027	0.60248	5.57414	0.084	0.0748	0.0012	0.0543	0.0015	1058	12	1063	15	1056	20	1068	29	100.473	100.663
71	Z_91500_2	9344c_TRA_Data	20/02/2019	18.12	91	79	29.6	0.374684	16	102400	6400	1.844	0.039	0.1792	0.0028	0.69934	5.58036	0.087	0.0746	0.0013	0.0528	0.0019	1061	14	1062	15	1057	18	1039	36	100.094	100.473
72	Z_91500_3	9344c_TRA_Data	20/02/2019	18.033	90	79.4	29.7	0.374055	10	102600	10260	1.848	0.032	0.1785	0.0028	0.57999	5.60224	0.092	0.0747	0.0013	0.0543	0.0019	1061	11	1058	15	1059	19	1068	36	99.7172	99.9056
73	Z_91500_4	9344c_TRA_Data	20/02/2019	18.033	90	81.7	30.9	0.378213	33	107000	3242.42	1.853	0.034	0.1795	0.0025	0.6883	5.57103	0.081	0.0746	0.0011	0.0536	0.0017	1065	12	1064	14	1056	17	1054	33	99.9061	100.758
74	Z_91500_5	9344c_TRA_Data	20/02/2019	17.977	90	78.9	29.5	0.373891	32	101700	3178.12	1.853	0.03	0.179	0.0025	0.58735	5.58659	0.078	0.0751	0.0011	0.0537	0.0016	1063	11	1061	14	1075	15	1058	30	99.8119	98.6977
75	Z_91500_6	9344c_TRA_Data	20/02/2019	17.977	90	80.7	30.4	0.376704	5	105000	21000	1.846	0.032	0.1792	0.0025	0.54241	5.58036	0.08	0.0749	0.0012	0.0537	0.0017	1061	12	1062	13	1062	19	1058	33	100.094	100
76	Z_91500_7	9344c_TRA_Data	20/02/2019	18.033	90	79.4	29.9	0.376574	31	110300	3558.06	1.859	0.036	0.1796	0.0027	0.67195	5.56793	0.082	0.075	0.0012	0.0538	0.0018	1065	13	1065	14	1068	18	1059	34	100	99.7191
77	Z_91500_8	9344c_TRA_Data	20/02/2019	18.033	90	80.9	30.2	0.3733	18	111100	6172.22	1.844	0.032	0.1789	0.0029	0.69858	5.58971	0.094	0.0747	0.0012	0.0537	0.0017	1060	12	1060	16	1060	18	1057	32	100	100
78	Z_91500_9	9344c_TRA_Data	20/02/2019	18.033	90	80.1	29.9	0.373283	56	107000	1910.71	1.849	0.03	0.1793	0.0026	0.58387	5.57724	0.08	0.0744	0.0012	0.0538	0.0019	1062	11	1063	14	1051	19	1058	36	100.094	101.142
79	Z_91500_10	9344c_TRA_Data	20/02/2019	17.934	90	78.9	29.8	0.377693	19	105600	5557.89	1.841	0.03	0.1775	0.0027	0.54077	5.6338	0.086	0.0757	0.0012	0.0537	0.0017	1059	11	1053	15	1076	19	1057	32	99.4334	97.8625
80	Z_91500_11	9344c_TRA_Data	20/02/2019	18.033	91	81	30.3	0.374074	58	109000	1879.31	1.861	0.034	0.1807	0.0028	0.73452	5.53403	0.085	0.07465	0.0011	0.0537	0.0018	1066	12	1071	15	1059	15	1057	34	100.469	101.133
81	Z_91500_0	9341c_TRA_Data	20/02/2019	15.016	76	78.1	28.9	0.370038	29	103800	3579.31	1.853	0.045	0.1801	0.0031	0.62851	5.55247	0.08	0.075	0.0013	0.0543	0.002	1062	16	1067	17	1068	21	1068	37	100.471	99.9064
82	Z_91500_1	9341c_TRA_Data	20/02/2019	15.076	76	77	29.2	0.379221	38	103600	2726.32	1.84	0.04	0.1796	0.0033	0.63453	5.56793	0.09	0.0747	0.0012	0.0552	0.002	1058	14	1064	18	1062	15	1085	38	100.567	100.188
83	Z_91500_2	9341c_TRA_Data	20/02/2019	15.018	76	83.7	31.3	0.373955	12	109900	9158.33	1.835	0.039	0.1778	0.003	0.48215	5.6243	0.082	0.0749	0.0013	0.0532	0.0019	1057	14	1055	17	1064	21	1047	35	99.8108	99.1541
84	Z_91500_3	9341c_TRA_Data	20/02/2019	14.992	75	80.1	30.2	0.377029	37	106600	2881.08	1.855	0.039	0.1788	0.0036	0.59024	5.59284	0.1	0.075	0.0013	0.0534	0.0019	1064	14	1060	20	1067	20	1050	36	99.6241	99.344
85	Z_91500_4	9341c_TRA_Data	20/02/2019	14.992	75	80.7	30.5	0.377943	88	107600	1222.73	1.871	0.038	0.1801	0.0035	0.52922	5.55247	0.096	0.0749	0.0013	0.0533	0.0016	1070	13	1067	19	1064	20	1050	30	99.7196	100.282
86	Z_91500_5	9341c_TRA_Data	20/02/2019	14.992	75	78.3	29.4	0.375479	31	104400	3367.74	1.859	0.042	0.1798	0.0034	0.52781	5.56173	0.094	0.0749	0.0014	0.0541	0.0019	1065	15	1066	19	1068	17	1065	36	100.094	99.8127
87	Z_91500_6	9341c_TRA_Data	20/02/2019	14.992	76	82.7	30.6	0.370012	117	106700	911.966	1.824	0.041	0.1774	0.0034	0.68474	5.63698	0.098	0.0748	0.0012	0.0525	0.0021	1052	15	1052	19	1062	16	1034	41	100	99.0584
88	Z_91500_7	9341c_TRA_Data	20/02/2019	14.96	75	79.1	29.8	0.376738	1	104400	104400	1.864	0.041	0.1793	0.0035	0.71282	5.57724	0.095	0.0751	0.0011	0.054	0.0018	1067	15	1063	19	1070	15	1062	35	99.6251	99.3458
89	Z_91500_8	9341c_TRA_Data	20/02/2019	14.982	75	81.6	30.7	0.376225	31	107900	3480.65	1.851	0.036	0.1798	0.0037	0.56906	5.56173	0.099	0.0746	0.0012	0.0542	0.002	1062	13	1065	20	1065	20	1066	38	100.282	100
90	Z_91500_9	9341c_TRA_Data	20/02/2019	15.16	76	78	30	0.384615	23	103700	4508.7	1.871	0.046	0.1814	0.0033	0.57662	5.51268	0.089	0.0749	0.0014	0.0527	0.002	1069	16	1074	18	1063	24	1037	38	100.468	101.035
91	Z_91500_10	9341c_TRA_Data	20/02/2019	14.982	75	80.2	29.7	0.370324	50	104000	2080	1.834	0.038	0.1777	0.0034	0.5446	5.62746	0.095	0.0748	0.0013	0.0541	0.0019	1056	14	1054	19	1062	21	1065	37	99.8106	99.2467
92	Z_91500_11	9341c_TRA_Data	20/02/2019	14.96	75	80.6	29.8	0.369727	43	104700	2434.88	1.848	0.038	0.1781	0.0037	0.22103	5.61482	0.1	0.0749	0.0012	0.0543	0.0021	1062	14	1056	20	1066	21	1068	40	99.435	99.0619
93	Z_91500_0	9349c_TRA_Data	21/02/2019	18.015	90	78.7	29.6	0.376112	23	115600	5026.09	1.858	0.036	0.1796	0.0031	0.58086	5.56793	0.083	0.0751	0.0012	0.0539	0.0015	1065	13	1065	17	1065	20	1060	28	100	100
94	Z_91500_1	9349c_TRA_Data	21/02/2019	17.502	88	78.6	29.4	0.374046	60	114300	1905	1.831	0.043	0.1793	0.003	0.67349	5.57724	0.082	0.074	0.0012	0.0538	0.0015	1055	15	1063	16	1049	17	1058	29	100.758	101.335
95	Z_91500_2	9349c_TRA_Data	21/02/2019	18.015	90	80.8	30.4	0.376238	48	119000	2479.17	1.867	0.038	0.1798	0.0029	0.59972	5.56173	0.08	0.0752	0.0012	0.0536	0.0012	1068	14	1065	16	1074	18	1054	23	99.7191	99.162
96	Z_91500_3	9349c_TRA_Data	21/02/2019	17.994	90	80.5	30	0.372671	30	116600	3886.67	1.834	0.036	0.1772	0.0031	0.56387	5.64334	0.09	0.0747	0.0012	0.054	0.0013	1056	13	1051	17	1060	19	1062	25	99.5265	99.1509
97	Z_91500_4	9349c_TRA_Data	21/02/2019	17.477	88	80.6	30.2	0.37469	52	117700	2263.46	1.84	0.031	0.1794	0.003	0.53437	5.57414	0.082	0.0747	0.0011	0.0535	0.0015	1059	11	1064	17	1060	14	1053	30	100.472	100.377
98	Z_91500_5	9349c_TRA_Data	21/02/2019	17.952	90	80.6	30.1	0.373449	25	117900	4716	1.869	0.038	0.1802	0.0032	0.63024	5.54939	0.087	0.0752	0.0011	0.0541	0.0014	1069	14	1067	17	1072	17	1064	27	99.8129	99.5336
99	Z_91500_6	9349c_TRA_Data	21/02/2019	18.035	90	79.8	30.08	0.376942	1	116100	116100	1.852	0.035	0.1786	0.0031	0.71266	5.5991	0.083	0.07502	0.00094	0.0535	0.0012	1063	12	1059	17	1071	15	1053	22	99.6237	98.8796
100	Z_91500_7	9349c_TRA_Data	21/02/2019	17.962	91	79.5	29.7	0.373585	1	115800	115800	1.875	0.038	0.1805	0.0031	0.58652	5.54017	0.081	0.0752	0.0012	0.0538	0.0011	1071	13	1069	17	1074	18	1058	22	99.8133	99.5345
101	Z_91500_8	9349c_TRA_Data	21/02/2019	18.142	91	83.1	30.9	0.371841	62	119400	1925.81	1.839	0.036	0.1774	0.0031	0.67069	5.63698	0.088	0.07507	0.0011	0.0537	0.0012	1060	12	1052	17	1071	16	1058	22	99.2453	98.226
102	Z_91500_9	9350c_TRA_Data	21/02/2019	18.278	92	75.8	28.54	0.376517	21	110500	5261.9	1.851	0.037	0.1784	0.0034	0.6858	5.60538	0.092	0.0751	0.0011	0.0536	0.0015	1062	13	1058	19	1068	18	1055	29	99.6234	99.0637
103	Z_91500_10	9350c_TRA_Data	21/02/2019	18.003	91	81.9	30.7	0.374847	35	120200	3434.29	1.843	0.036	0.1807	0.003	0.45856	5.53403	0.077	0.074	0.0013	0.054	0.0016	1063	13	1071	16	1039	21	1063	31	100.753	103.08
104	Z_91500_11	9350c_TRA_Data	21/02/2019	18.11	91	82.8	31	0.374396	9	119400	13266.7	1.845	0.037	0.1784	0.003	0.54783	5.60538	0.078	0.0748	0.0012	0.0536	0.0014	1060	13	1058	16	1060	16	1055	26	99.8113	99.8113
105	Z_91500_0	9342c_TRA_Data	20/02/2019	17.981	90	79.7	29.9	0.375157	63	98700	1566.67	1.843	0.037	0.1793	0.0062	0.63325	5.57724	0.078	0.0754	0.0014	0.054	0.0015	1061	13	1063	34	1075	19	1062	29	100.189	98.8837
106	Z_91500_1	9342c_TRA_Data	20/02/2019	18.026	90	78.6	29.8	0.379135	47	97600	2076.6	1.869	0.039	0.1796	0.0063	0.42107	5.56793	0.084	0.076	0.0016	0.0539	0.0015	1069	14	1065	34	1097	25	1060	30	99.6258	97.083
107	Z_91500_2	9342c_TRA_Data	20/02/2019	18.026	90	78	29.1	0.373077	17	97200	5717.65	1.847	0.041	0.1805	0.0064	0.61453	5.54017	0.09	0.0742	0.0014	0.0537	0.0012	1060	14	1069	35	1053	22	1056	23	100.849	101.519
108	Z_91500_3	9342c_TRA_Data	20/02/2019	18.445	93	78.8	29.5	0.374365	18	96600	5366.67	1.841	0.036	0.178	0.0062	0.66522	5.61798	0.085	0.075	0.0014	0.0536	0.0014	1059	13	1056	34	1065	23	1055	28	99.7167	99.1549
109	Z_91500_4	9342c_TRA_Data	20/02/2019	18.071	91	84.7	32.1	0.378985	16	104300	6518.75	1.857	0.042	0.1814	0.0064	0.65827	5.51268	0.09	0.0743	0.0014	0.0536	0.0013	1064	15	1074	35	1046	22	1054	25	100.94	102.677
110	Z_91500_5	9342c_TRA_Data	20/02/2019	18.071	91	79.8	29.9	0.374687	42	98300	2340.48	1.846	0.036	0.1784	0.0062	0.39407	5.60538	0.083	0.0742	0.0014	0.0541	0.0014	1061	13	1058	34	1047	22	1064	27	99.7172	101.051
111	Z_91500_6	9342c_TRA_Data	20/02/2019	18.026	90	81.1	30.3	0.373613	7	98300	14042.9	1.844	0.036	0.176	0.0062	0.53079	5.68182	0.084	0.075	0.0015	0.0535	0.0015	1060	13	1045	34	1072	24	1053	28	98.5849	97.4813
112	Z_91500_7	9342c_TRA_Data	20/02/2019	18.026	91	82.5	30.3	0.367273	13	99780	7675.38	1.838	0.036	0.1786	0.0062	0.58038	5.5991	0.085	0.0745	0.0014	0.0537	0.0013	1058	13	1059	34	1057	26	1058	25	100.095	100.189
113	Z_91500_8	9342c_TRA_Data	20/02/2019	18.071	91	77.8	29.2	0.375321	55	96300	1750.91	1.877	0.039	0.1812	0.0064	0.66527	5.51876	0.086	0.0754	0.0014	0.0537	0.0014	1071	14	1073	35	1079	23	1057	26	100.187	99.4439
114	Z_91500_9	9342c_TRA_Data	20/02/2019	18.381	93	80.7	30.4	0.376704	12	98200	8183.33	1.844	0.041	0.1794	0.0062	0.702	5.57414	0.083	0.0748	0.0014	0.0538	0.0014	1062	15	1063	34	1060	25	1058	27	100.094	100.283
115	Z_91500_10	9342c_TRA_Data	20/02/2019	18.071	91	77.7	28.8	0.370656	35	93800	2680	1.842	0.04	0.1775	0.0063	0.66434	5.6338	0.093	0.0755	0.0014	0.0537	0.0017	1059	14	1053	34	1084	21	1057	32	99.4334	97.1402
116	Z_91500_11	9342c_TRA_Data	20/02/2019	18.026	90	80.9	31.2	0.385661	65	100500	1546.15	1.856	0.037	0.1816	0.0065	0.59095	5.50661	0.094	0.0745	0.0014	0.0537	0.0013	1066	14	1075	36	1059	20	1057	25	100.844	101.511
117	Z_91500_0	9351c_TRA_Data	21/02/2019	18.147	91	80.8	29.88	0.369802	38	116400	3063.16	1.842	0.03	0.1781	0.0033	0.52306	5.61482	0.072	0.0749	0.002	0.053	0.0019	1059.4	11	1056	18	1068	30	1043	35	99.6791	98.8764
118	Z_91500_1	9351c_TRA_Data	21/02/2019	18.347	92	76.3	28.5	0.373526	2	111500	55750	1.865	0.032	0.1801	0.0035	0.63276	5.55247	0.076	0.0748	0.002	0.0545	0.0016	1068	11	1067	19	1063	32	1073	32	99.9064	100.376
119	Z_91500_2	9351c_TRA_Data	21/02/2019	18.101	91	81.7	30.4	0.372093	3	117200	39066.7	1.835	0.033	0.1773	0.0036	0.51955	5.64016	0.085	0.0751	0.0021	0.053	0.0018	1057	12	1052	20	1069	36	1043	35	99.527	98.4097
120	Z_91500_3	9351c_TRA_Data	21/02/2019	18.147	91	83	31.3	0.377108	42	120600	2871.43	1.847	0.033	0.1789	0.0033	0.66547	5.58971	0.069	0.07487	0.002	0.0537	0.0019	1061	12	1061	18	1063	35	1057	36	100	99.8119
121	Z_91500_4	9351c_TRA_Data	21/02/2019	18.101	91	78.6	29.8	0.379135	37	116200	3140.54	1.861	0.033	0.1822	0.0034	0.52665	5.48847	0.072	0.0748	0.002	0.0544	0.0018	1066	12	1079	19	1067	35	1071	35	101.22	101.125
122	Z_91500_5	9351c_TRA_Data	21/02/2019	18.101	91	80.1	30.2	0.377029	33	116700	3536.36	1.845	0.034	0.1776	0.0037	0.56927	5.63063	0.089	0.0749	0.0021	0.0537	0.0018	1060	12	1054	20	1063	38	1057	34	99.434	99.1533
123	Z_91500_6	9351c_TRA_Data	21/02/2019	18.147	91	79.8	30.1	0.377193	14	118000	8428.57	1.861	0.031	0.1791	0.0036	0.75632	5.58347	0.084	0.07487	0.0019	0.0531	0.0018	1066	11	1062	20	1063	30	1045	35	99.6248	99.9059
124	Z_91500_7	9351c_TRA_Data	21/02/2019	18.101	91	80.7	30.1	0.372986	15	119800	7986.67	1.848	0.032	0.1795	0.0037	0.54043	5.57103	0.085	0.0749	0.002	0.0542	0.0018	1062	11	1064	20	1066	31	1066	35	100.188	99.8124
125	Z_91500_8	9351c_TRA_Data	21/02/2019	18.045	91	82.5	30.9	0.374545	7	122300	17471.4	1.838	0.035	0.1789	0.0038	0.64741	5.58971	0.088	0.0748	0.002	0.0535	0.0018	1058	13	1061	21	1062	31	1052	34	100.284	99.9058
126	Z_91500_9	9351c_TRA_Data	21/02/2019	18.091	91	81.4	30.7	0.37715	76	120900	1590.79	1.863	0.033	0.1775	0.0035	0.65606	5.6338	0.079	0.07503	0.002	0.0529	0.0018	1067	12	1053	19	1068	29	1042	34	98.6879	98.5955
127	Z_91500_10	9351c_TRA_Data	21/02/2019	18.147	91	76.5	28.46	0.372026	7	115400	16485.7	1.843	0.036	0.1794	0.0033	0.66901	5.57414	0.067	0.07465	0.0019	0.0546	0.0017	1059	13	1063	18	1063	28	1074	33	100.378	100
128	Z_91500_11	9351c_TRA_Data	21/02/2019	17.855	90	80.5	30.4	0.37764	53	122100	2303.77	1.847	0.032	0.1809	0.0036	0.5959	5.52792	0.081	0.075	0.002	0.0537	0.0018	1061	11	1071	20	1069	29	1056	34	100.943	100.187
	Notes
	1 Calibration standard: 91500m zircon (U=80 ppm, Th=30 ppm) (Wiedenbeck et al., 2004)
	2 Common Pb correction made using the method of Andersen (2002), as calculated by Iolite v.3.6
	3 Data corrected for background, drift and downhole U/Pb fractionation using Iolite v.3.6 and 91500 zircon as calibration standard
	4 Uncertainties Uncertainties quoted are Iolite output of 2SE for isotopic ratios, either as internal error only and expressed as 2sint for age or propagated random errors (Internal error + Calculated excess uncertainity) and expressed as 2sprop for age (Paton et al., 2010)
	5 Dates calculated using the decay constants of Jaffey et al. (1971)
	6 Concordence calculated as (206Pb-238U age/207Pb-235U age)*100
	7 Concordance calculated as (206Pb-238U age/207Pb-206Pb age)*100
	8 If zircon age <1100Ma, preferred age is 206Pb-238U age with concordance as 90%-105%; if zircon age ≥1100Ma, Preferred age is 207Pb-206Pb age with concordance as 85%-105%.

## Sheet: G49684
Sylvester, P.J., Souders, A.K., and Liu, R., 2022, Significance of U-Pb detrital zircon geochronology for mudstone provenance: Geology, v. 50, https://doi.org/10.1130/G49684.1
